# Supplementary material for: Design, synthesis, in vitro and in silico evaluation of indole-based tetrazole derivatives as putative anti-breast cancer agents
Source: Royal Society of Chemistry journal article supplement (doi:10.1039/d3md00730h), 2024-01-01
Supplement: d3md00730h1.pdf [file d3md00730h1.pdf]

## Design, Synthesis, In Vitro and In Silico Evaluation of Indole Based Tetrazole Derivatives as Putative Anti-Breast Cancer Agents

Kamalpreet Kaur<sup>a</sup>, Harkomal Verma<sup>b</sup>, Prabhakar Gangwar<sup>b</sup>, Monisha Dhiman<sup>c</sup>, Vikas Jaitak<sup>a,\*</sup>

<sup>a</sup>Department of Pharmaceutical Sciences and Natural Products. Central University of Punjab, Ghudda, Bathinda (Pb), India-151401

<sup>b</sup>Department of Zoology. Central University of Punjab, Ghudda, Bathinda (Pb), India-151401

<sup>c</sup>Department of Microbiology, Central University of Punjab, Ghudda, Bathinda (Pb), India-151401

Email: [vikasjaitak@gmail.com](mailto:vikasjaitak@gmail.com)

### Table of Content

**Supplementary Table S1.** Docking score and binding modes of the synthesised indole-tetrazole derivatives.

**Supplementary Table S2.** The SMILES strings of the active compounds.

**Figure S1.** HPLC spectrum and peak area of compound **5d**.

**Figure S2.** HPLC spectrum and peak area of compound **5f**.

**Figure S3.** MTT assay results indicating dose-dependent response of test compounds in comparison to positive control bazedoxifene (Baz) on breast cancer cell line T-47D for 48 h.

**Figure S4.** MTT assay results indicating dose-dependent response of test compounds in comparison to positive control bazedoxifene (Baz) on breast cancer cell line MCF-7 for 48 h.

**Figure S5.** MTT assay results indicating dose-dependent response of test compounds in comparison to positive control bazedoxifene (Baz) on breast cancer cell line MDA-MB-231 for 48 h.

**Figure S6.** MTT assay results indicating dose-dependent response of selected test compounds in comparison to positive control bazedoxifene (Baz) on human embryonic kidney cells HEK-293 for 48 h.

**Figure S7-S12.** <sup>1</sup>H NMR, <sup>13</sup>C NMR, Mass Spectra of intermediates **2a** and **2b**.

**Figure S13-S18.** <sup>1</sup>H NMR, <sup>13</sup>C NMR, Mass Spectra of intermediates **3a** and **3b**.

**Figure S19-S26.** <sup>1</sup>H NMR, <sup>13</sup>C NMR, HRMS and FT-IR Spectra of compounds **4a** and **4b**.

**Figure S27-S74.** <sup>1</sup>H NMR, <sup>13</sup>C NMR, HRMS and FT-IR Spectra of compounds **4a** and **4b**.

**Figure S75-S89.** <sup>1</sup>H NMR, <sup>13</sup>C NMR, HRMS and FT-IR Spectra of compounds **4a** and **4b**.

**Supplementary Table 1.** Docking score and binding poses of the synthesised indole-tetrazole derivatives.

| S. No. | Compound | Docking Score (Kcal/Mol) | Interaction Pose |
|--------|----------|--------------------------|------------------|
| 1.     | 4a       | -6.535                   |                  |
| 2.     | 4b       | -6.896                   |                  |
| 3.     | 5a       | -7.948                   |                  |

|    |    |        |  |
|----|----|--------|--|
| 4. | 5b | -8.614 |  |
| 5. | 5c | -8.575 |  |
| 6. | 5d | -7.877 |  |
| 7. | 5e | -7.735 |  |



|     |    |        |  |
|-----|----|--------|--|
| 12. | 5j | -7.3   |  |
| 13. | 5k | -7.172 |  |
| 14. | 5l | -7.739 |  |
| 15. | 5m | -7.272 |  |

|     |    |        |  |
|-----|----|--------|--|
| 16. | 5n | -6.742 |  |
| 17. | 5o | -6.708 |  |
| 18. | 5p | -6.543 |  |

|     |    |        |                                                                                      |
|-----|----|--------|--------------------------------------------------------------------------------------|
| 19. | 6i | -8.323 | 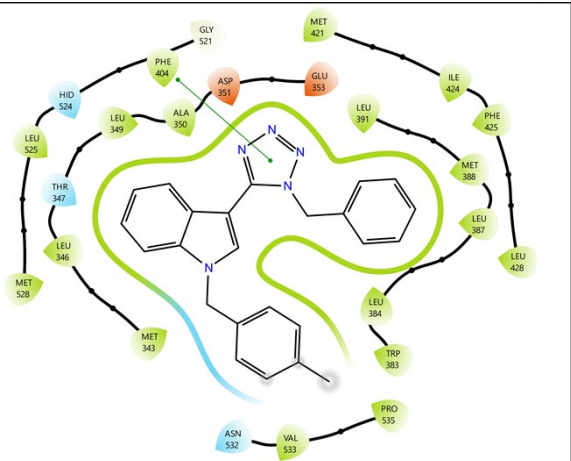   |
| 20. | 6j | -6.873 |   |
| 21. | 6k | -7.574 |  |



|     |              |        |  |
|-----|--------------|--------|--|
| 22. | 6l           | -7.284 |  |
| 23. | 6m           | -7.35  |  |
| 24. | Bazedoxifene | -9.482 |  |



**Supplementary Table S2.** The SMILES strings of the active compounds.

| Compound  | Structure                                                                         | SMILES                                                                    |
|-----------|-----------------------------------------------------------------------------------|---------------------------------------------------------------------------|
| <b>5d</b> | 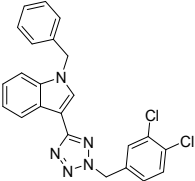 | <chem>ClC1=CC(CN2N=NC(C3=CN(CC4=CC=CC=C4)C5=CC=CC=C53)=N2)=CC=C1Cl</chem> |
| <b>5f</b> |  | <chem>ClC(C=C1)=CC=C1CN2N=NC(C3=CN(CC4=CC=CC=C4)C5=CC=CC=C53)=N2</chem>   |

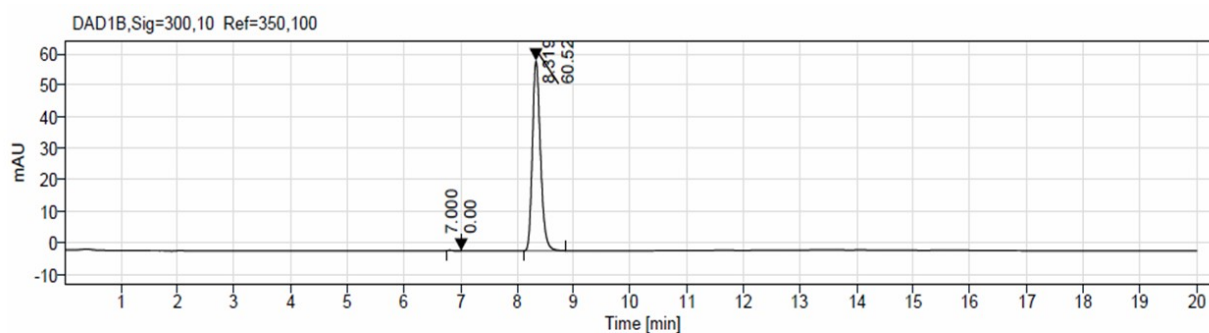

Signal: DAD1B, Sig=300,10 Ref=350,100

| Name | RT [min] | Area    | Area % | Height | Height % |
|------|----------|---------|--------|--------|----------|
| 1    | 7.000    | 0.309   | 0.05   | 0.000  | 0.00     |
| 2    | 8.319    | 601.990 | 99.95  | 60.517 | 100.00   |

**Figure S1.** HPLC spectrum and peak area of compound **5d**.

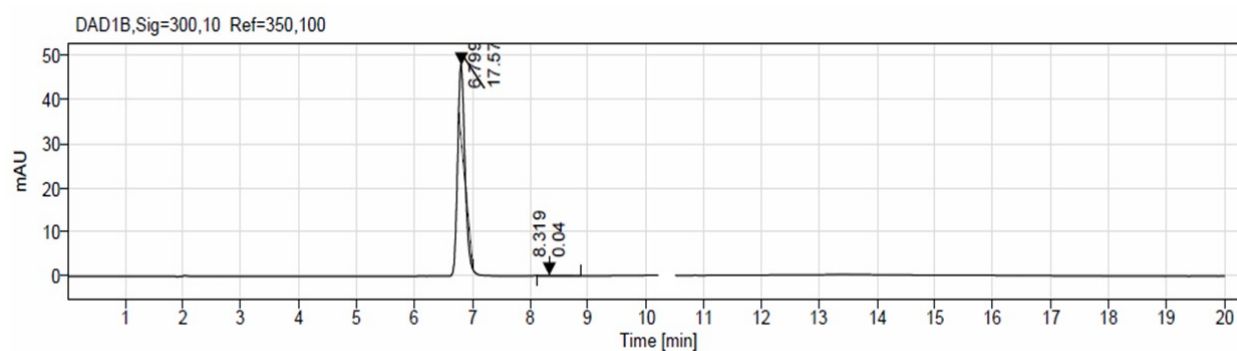

Signal: DAD1B, Sig=300,10 Ref=350,100

| Name | RT [min] | Area   | Area % | Height | Height % |
|------|----------|--------|--------|--------|----------|
| 1    | 6.799    | 55.768 | 97.97  | 17.572 | 99.76    |
| 2    | 8.319    | 1.156  | 2.03   | 0.043  | 0.24     |

**Figure S2.** HPLC spectrum and peak area of compound **5f**.

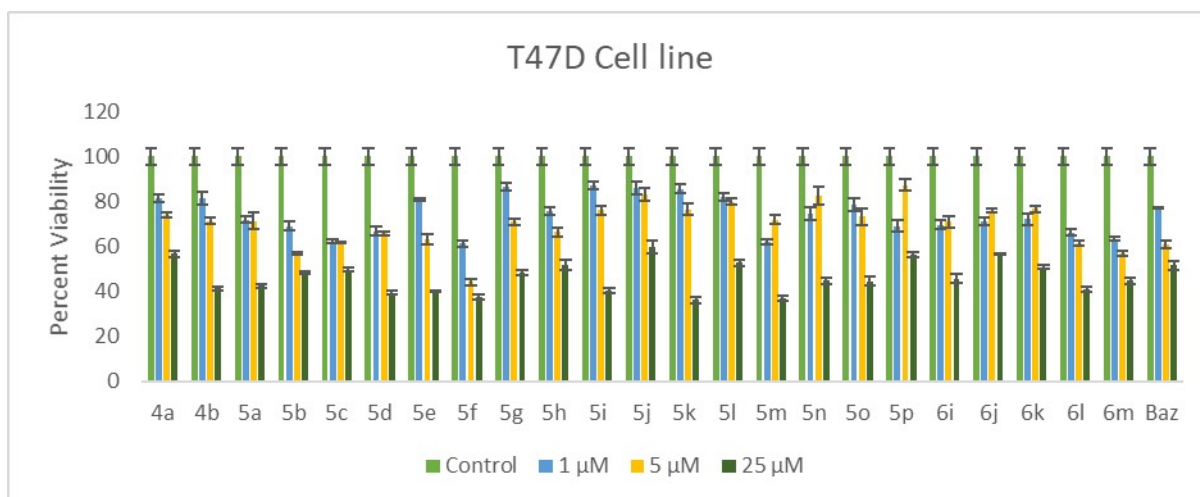

**Figure S3.** MTT assay results indicating dose-dependent response of test compounds in comparison to positive control bazedoxifene (Baz) on breast cancer cell line T-47D for 48 h.

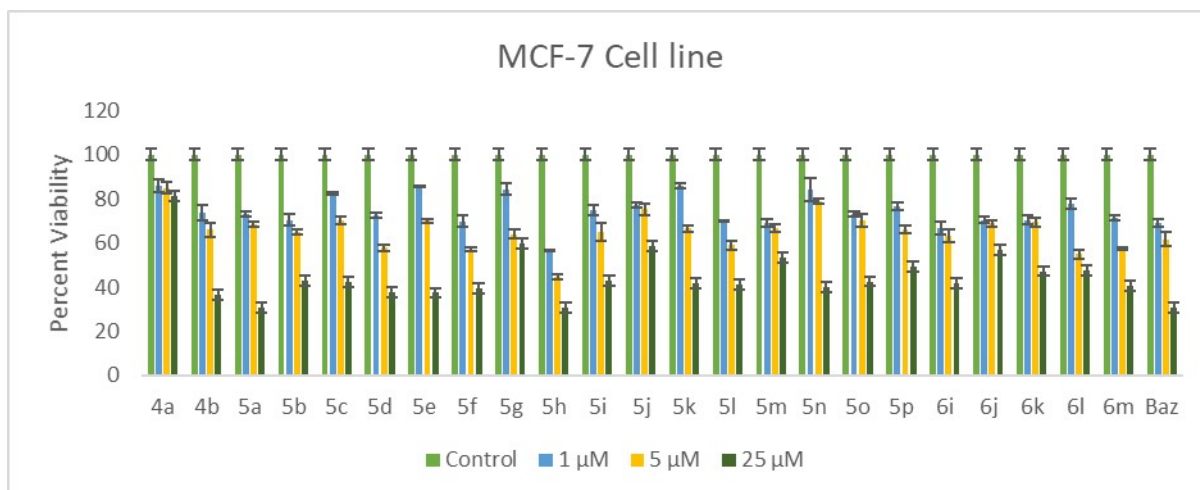

**Figure S4.** MTT assay results indicating dose-dependent response of test compounds in comparison to positive control bazedoxifene (Baz) on breast cancer cell line MCF-7 for 48 h.

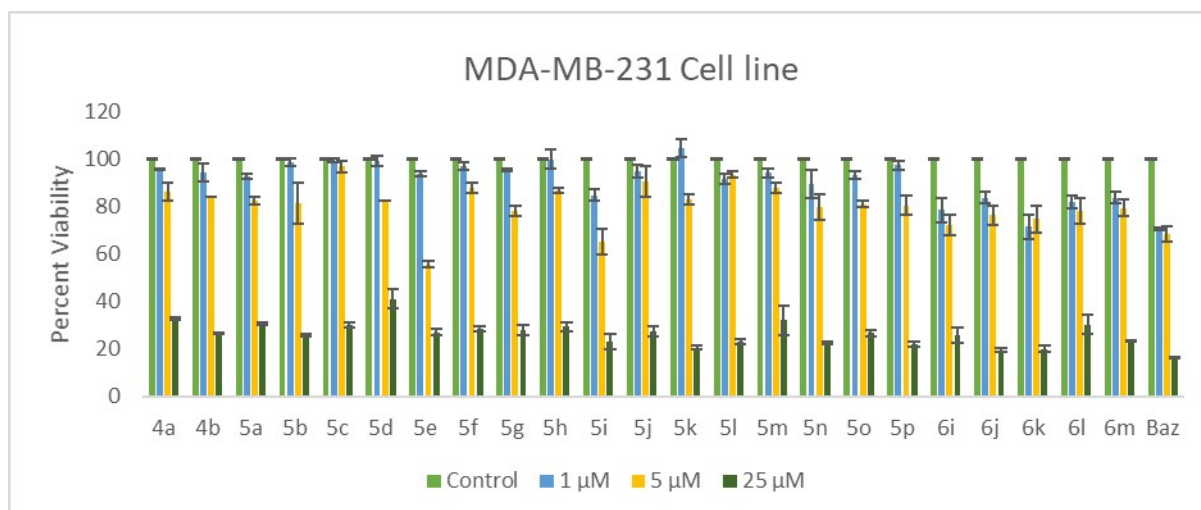

**Figure S5.** MTT assay results indicating dose-dependent response of test compounds in comparison to positive control basedoxifene (Baz) on breast cancer cell line MDA-MB-231 for 48 h.

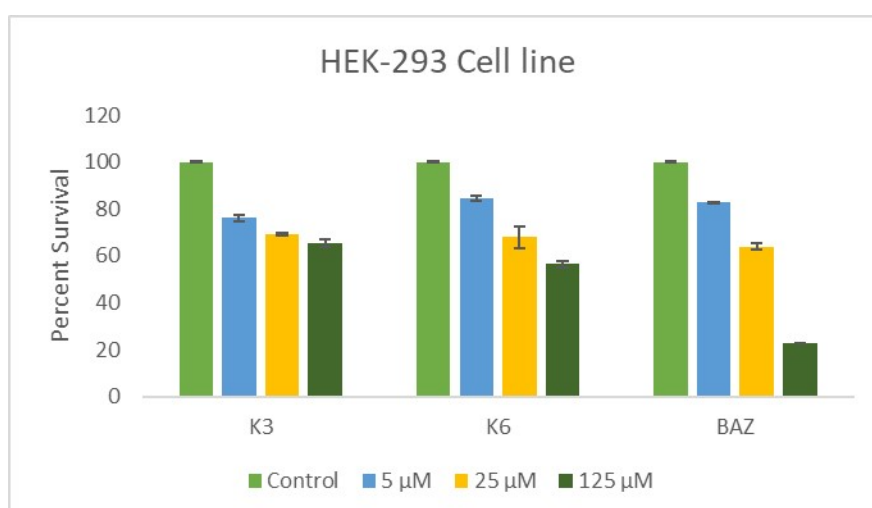

**Figure S6.** MTT assay results indicating dose-dependent response of selected test compounds in comparison to positive control basedoxifene (Baz) on human embryonic kidney cells HEK-293 for 48 h.

$^1\text{H}$  NMR,  $^{13}\text{C}$  NMR, Mass Spectra and FT-IR of synthesized compounds.

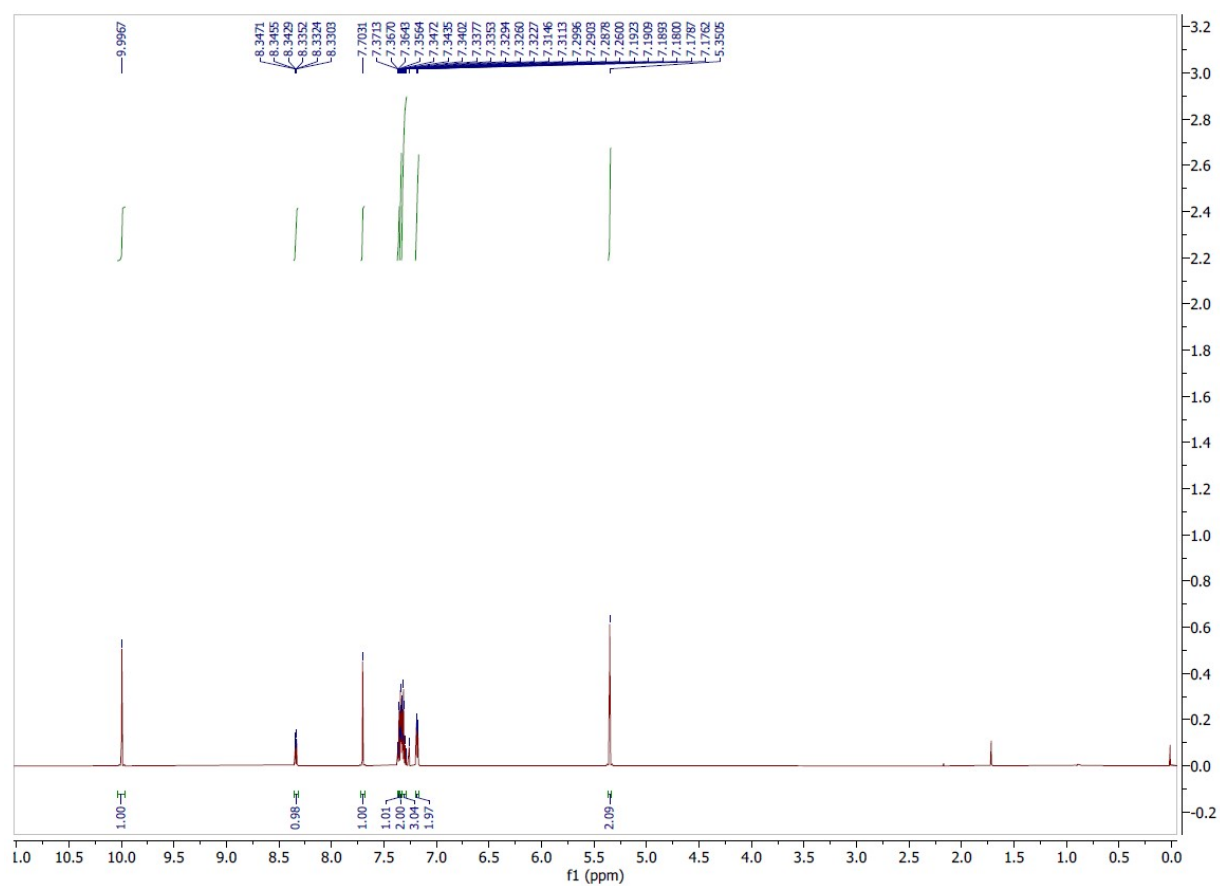

Figure S7.  $^1\text{H}$  NMR spectrum of compound 2a

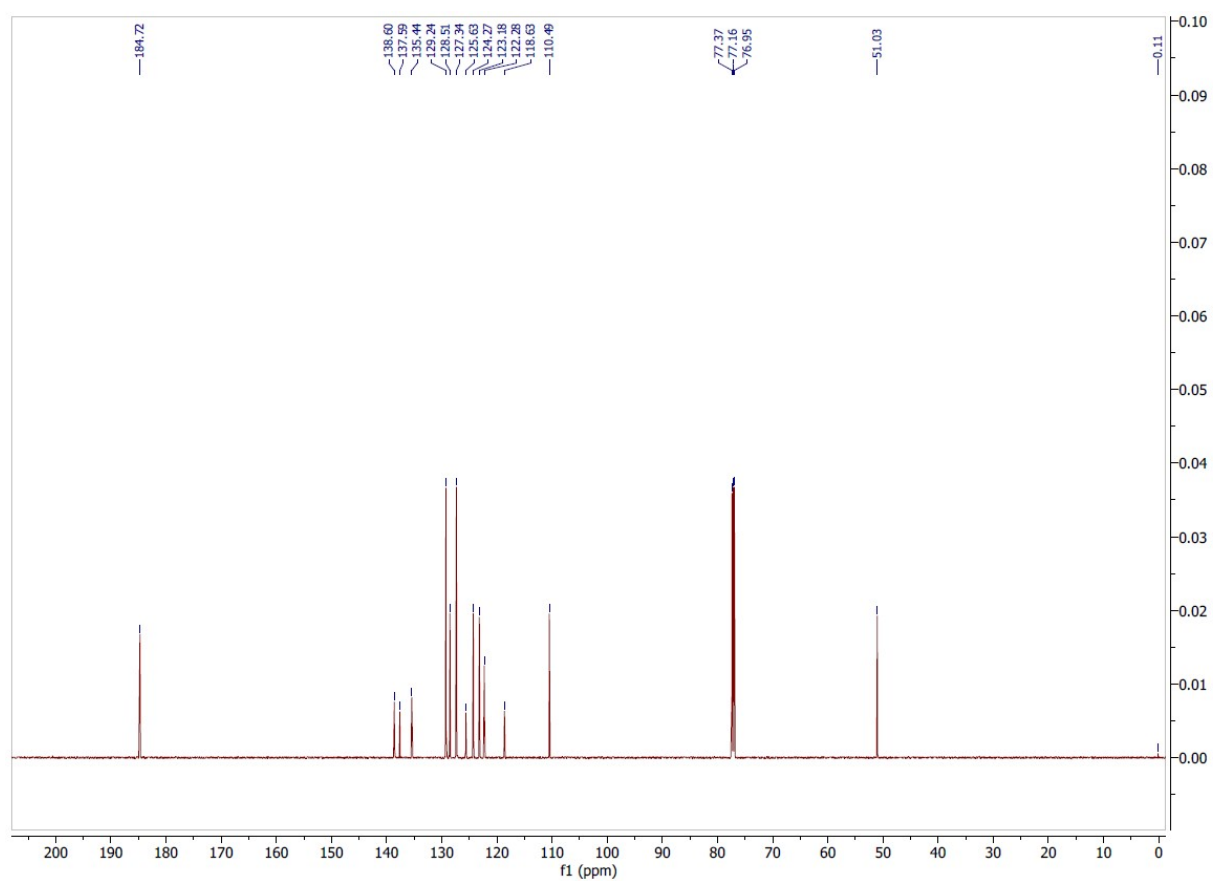

Figure S8.  $^{13}\text{C}$  NMR spectrum of compound 2a

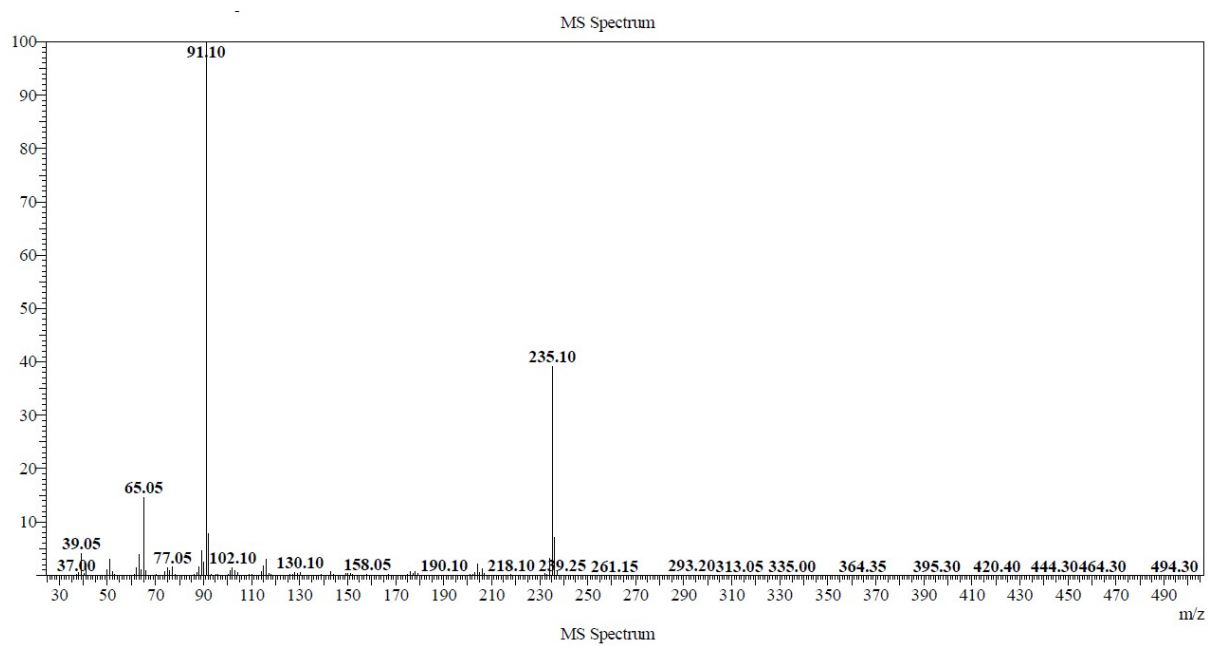

**Figure S9. Mass spectrum (ESI-MS) of compound 2a**



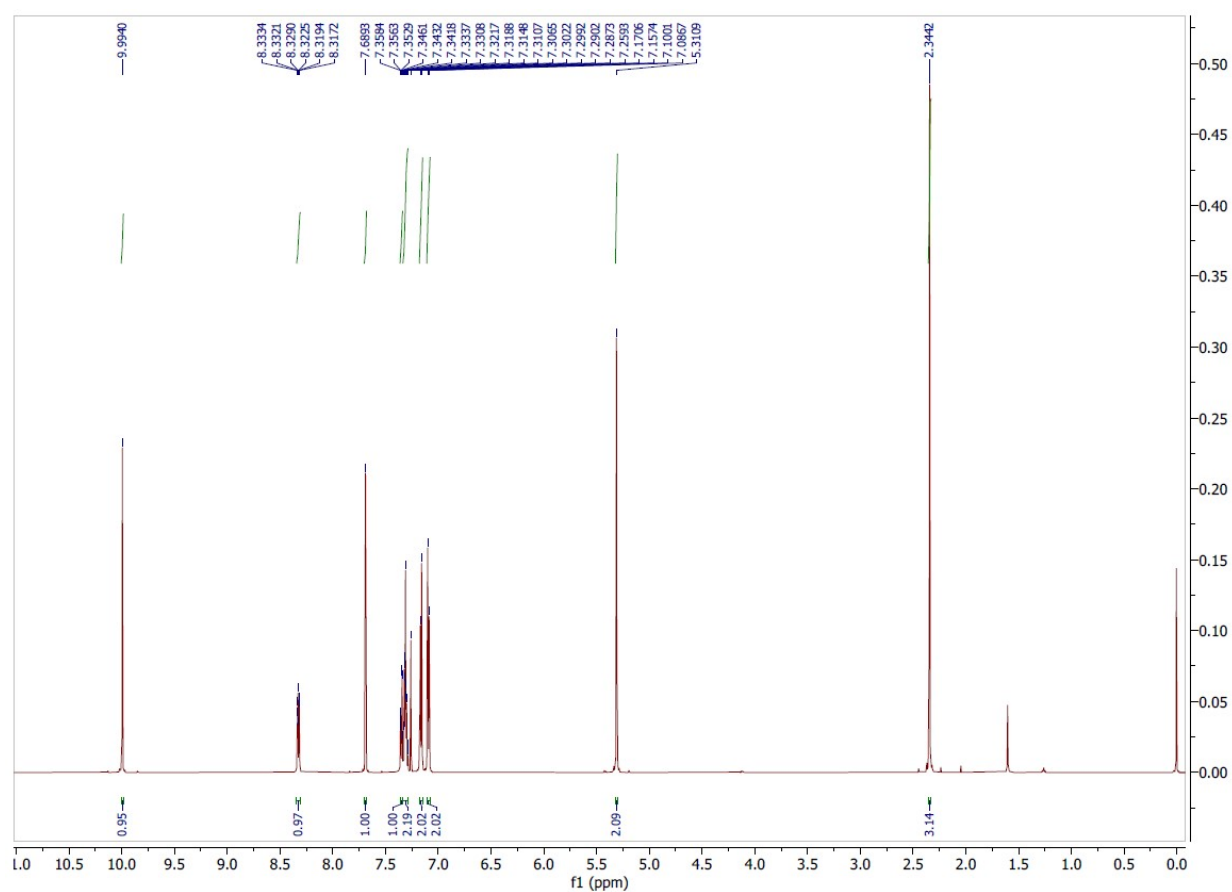

Figure S10. <sup>1</sup>H NMR spectrum of compound 2b

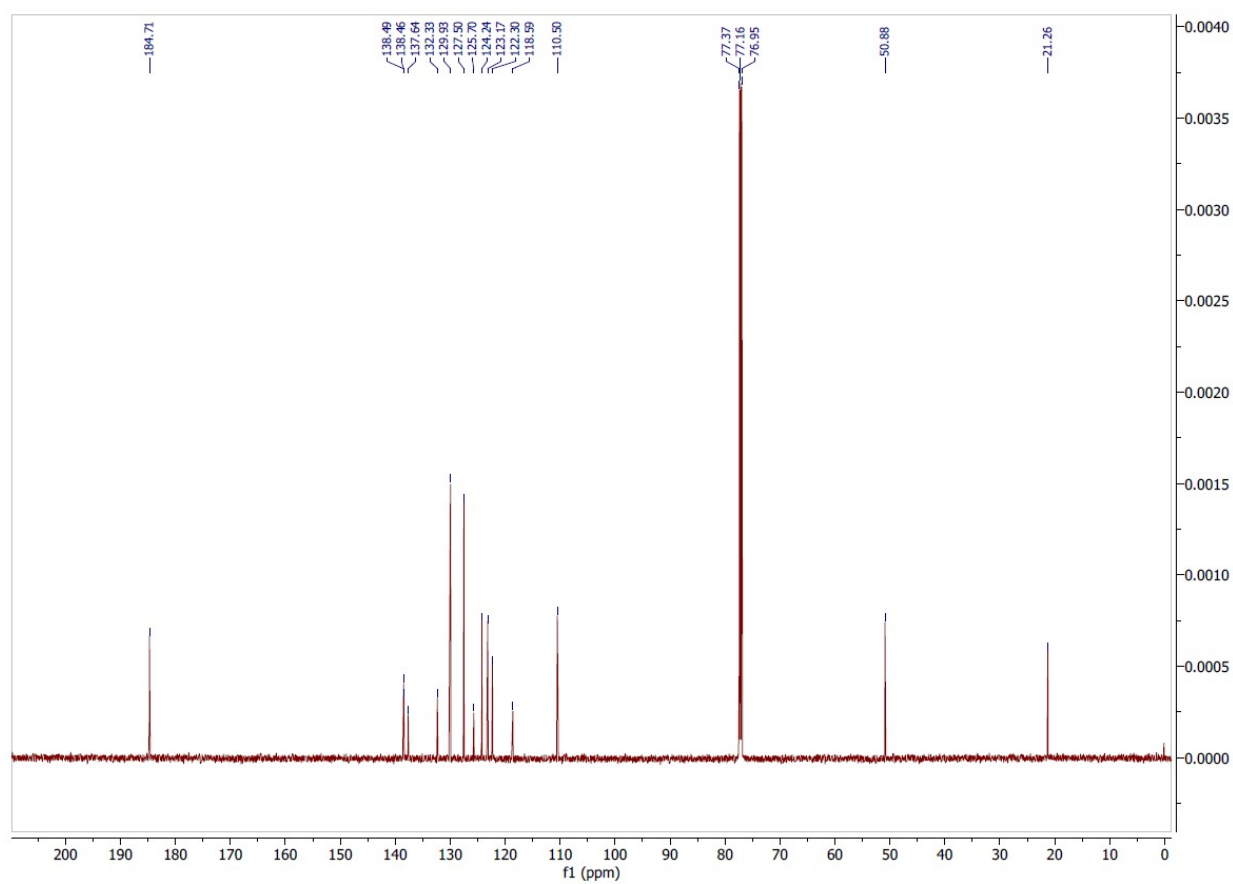

Figure S11.  $^{13}\text{C}$  NMR spectrum of compound 2b

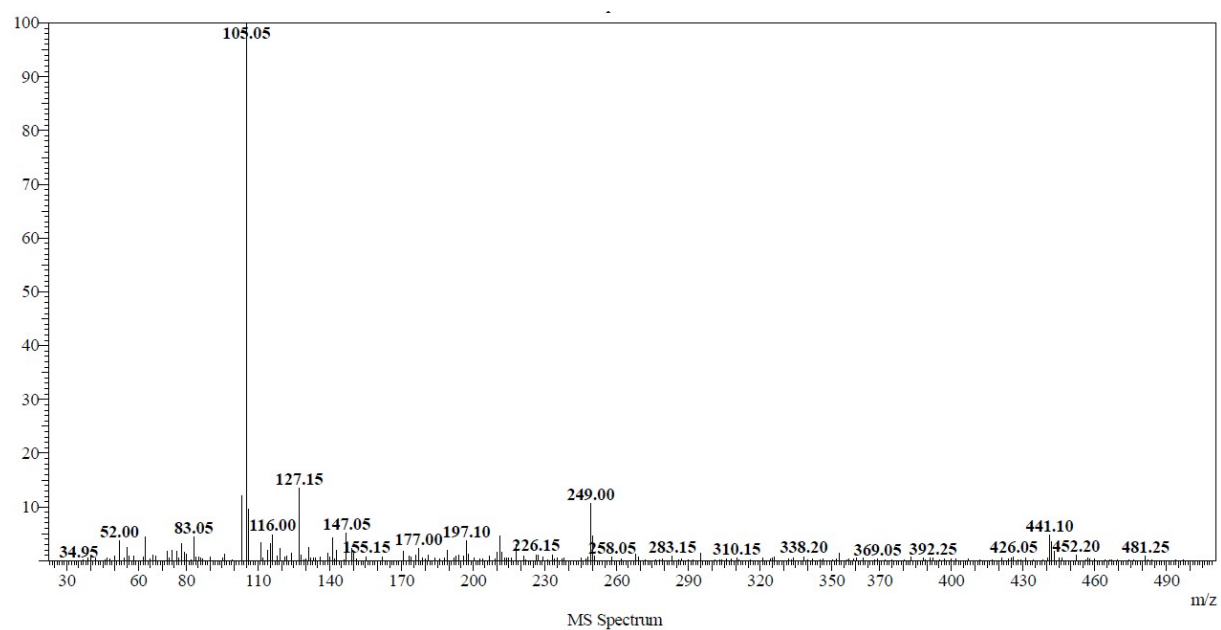

**Figure S12. Mass spectrum (ESI-MS) of compound 2b**

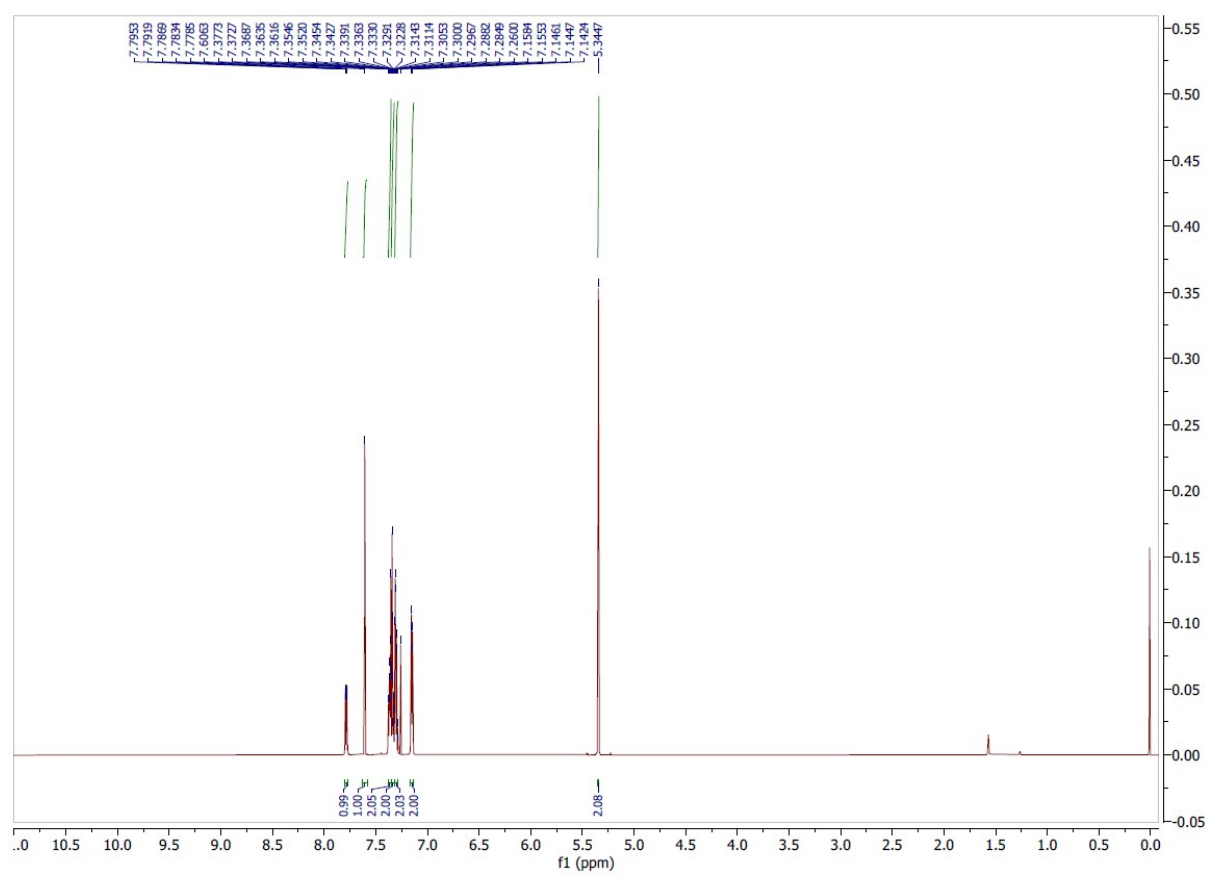

Figure S13. <sup>1</sup>H NMR spectrum of compound 3a

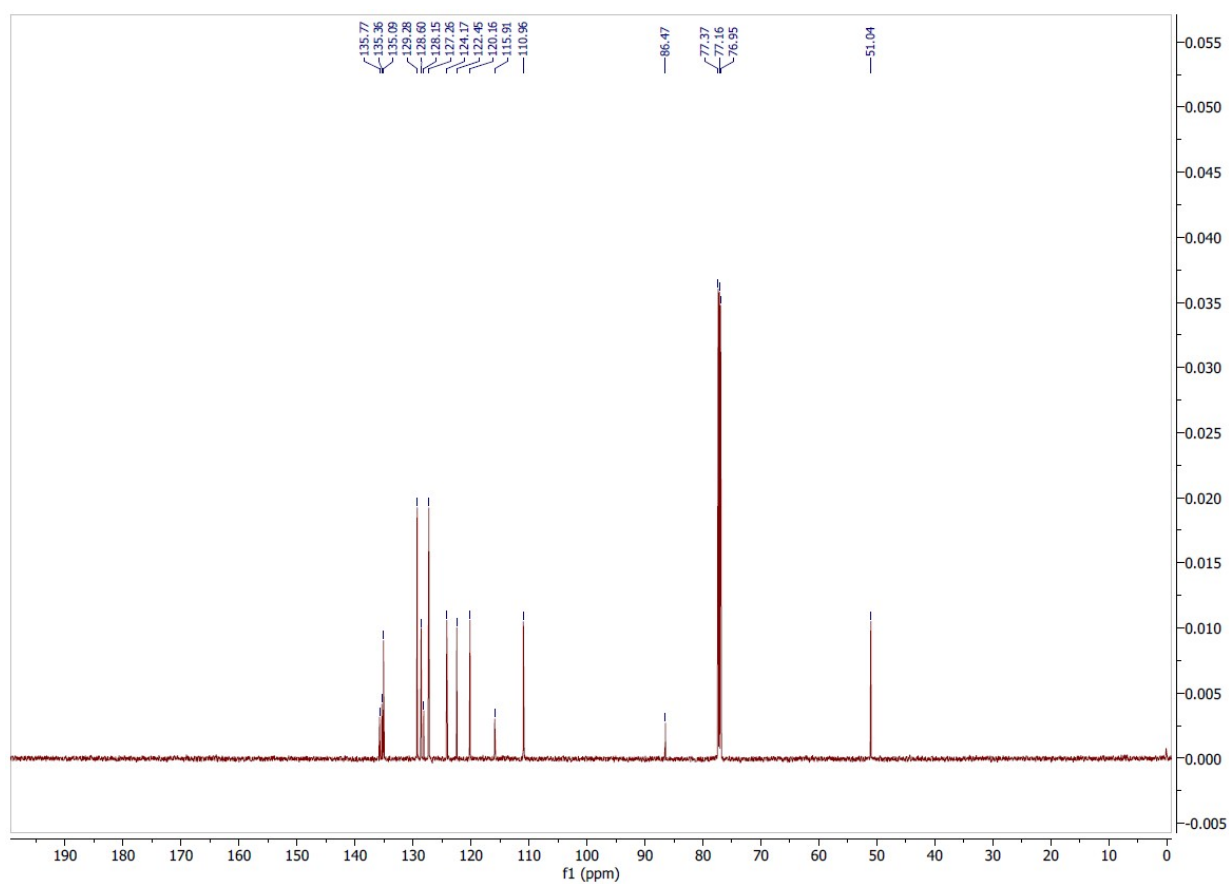

Figure S14. <sup>13</sup>C NMR spectrum of compound 3a

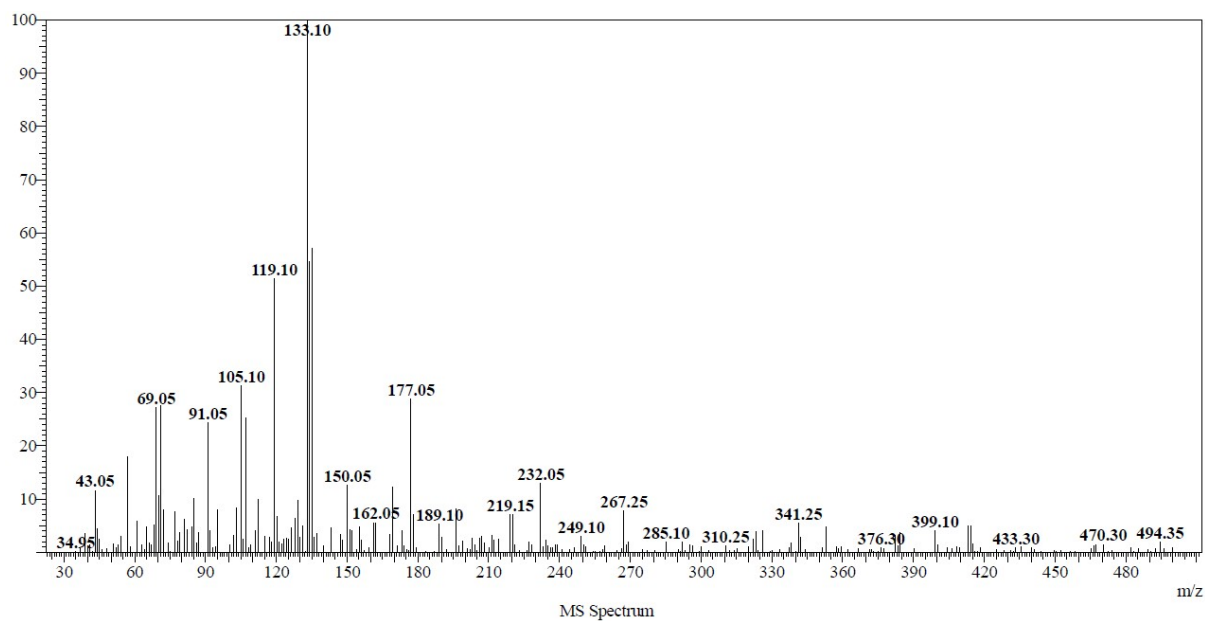

**Figure S15. Mass spectrum (ESI-MS) of compound 3a**

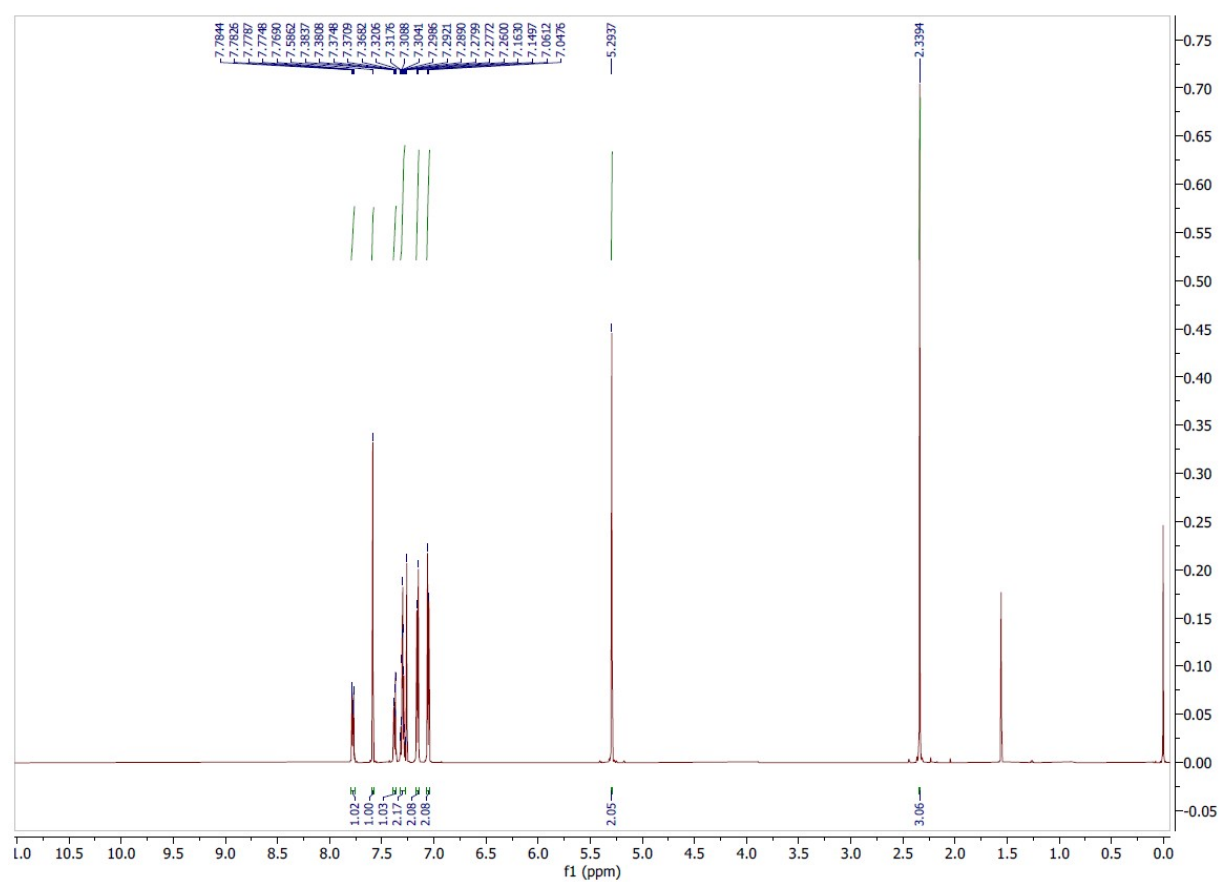



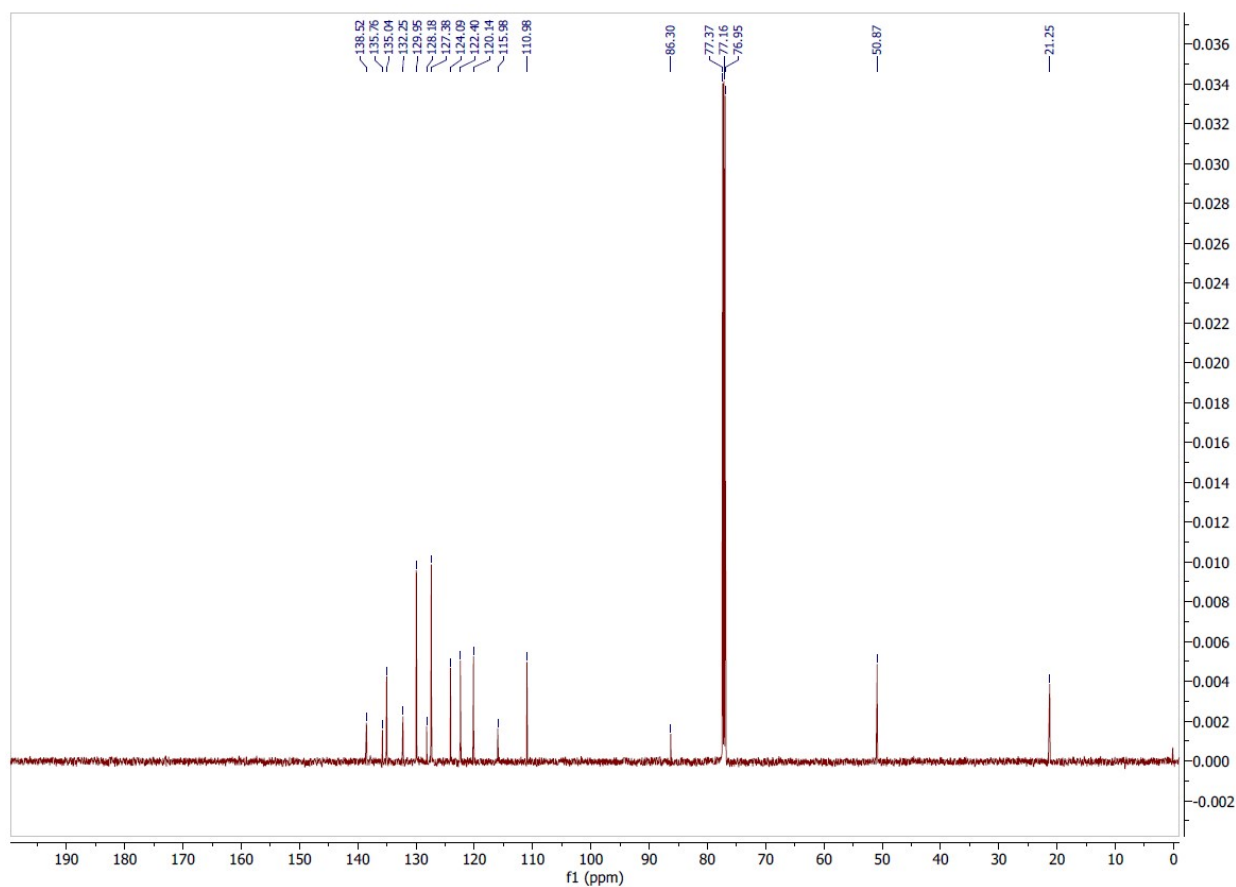

Figure S17. <sup>13</sup>C NMR spectrum of compound 3b

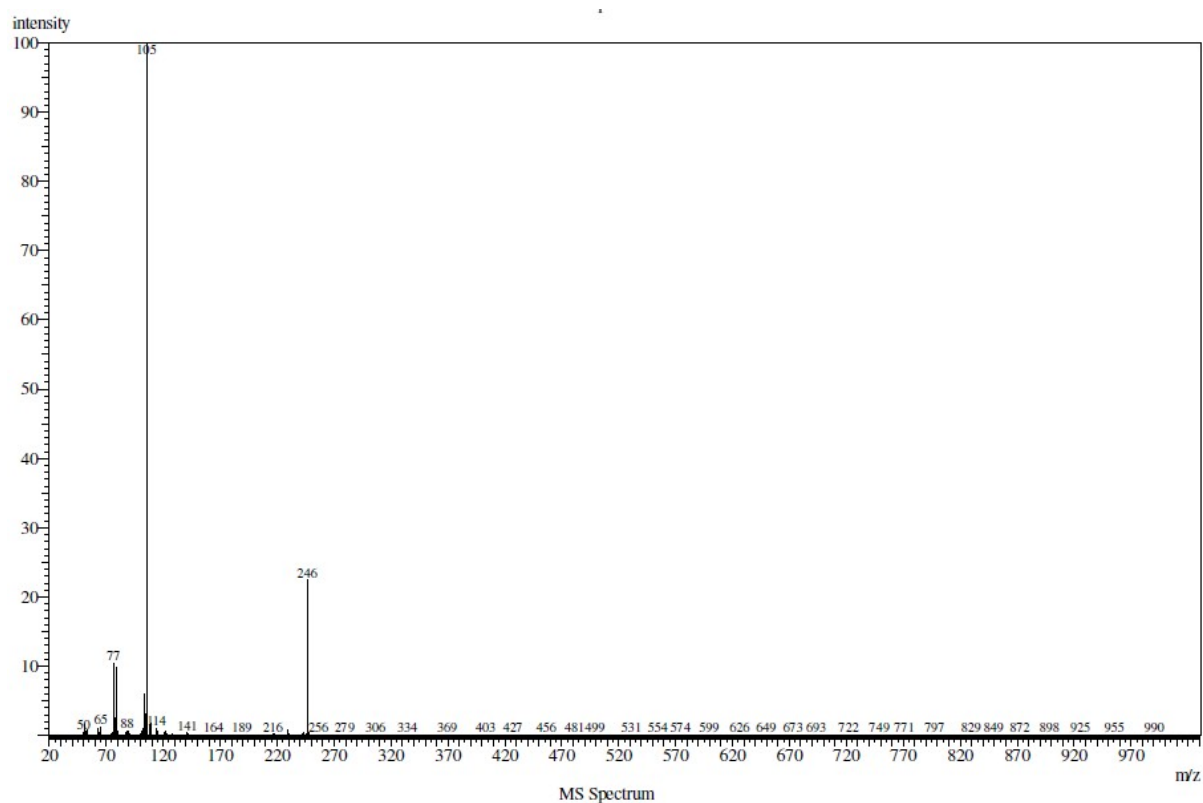

**Figure S18. Mass spectrum (ESI-MS) of compound 3b**

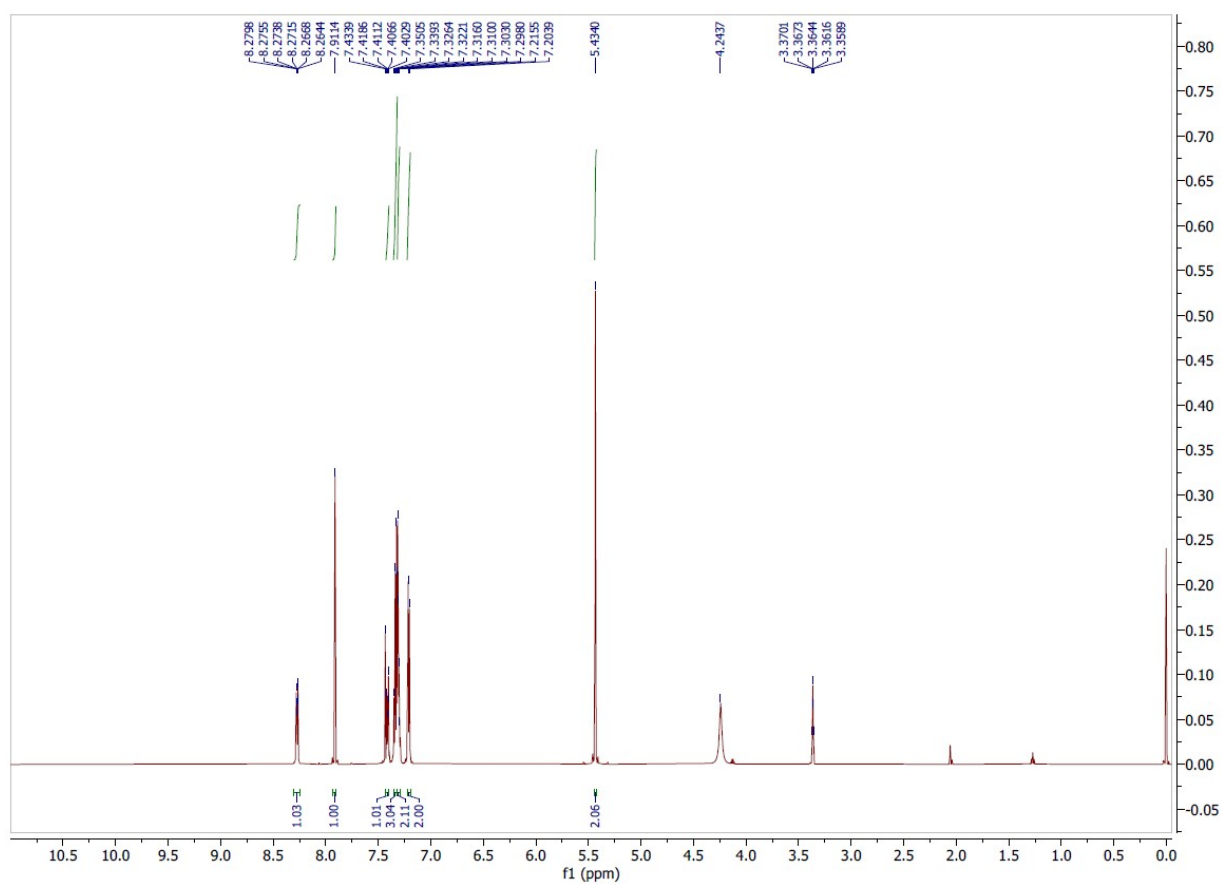

Figure S19. <sup>1</sup>H NMR spectrum of compound 4a

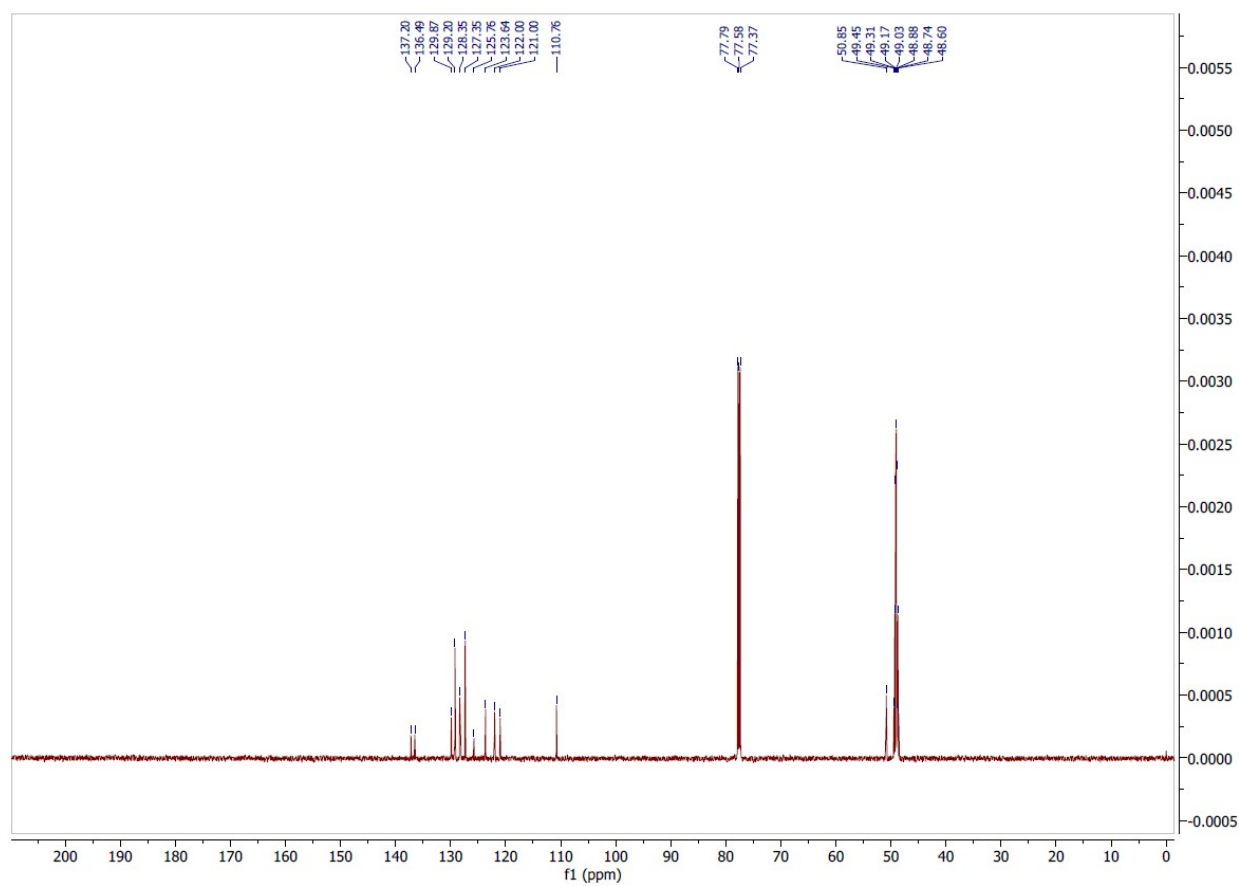

Figure S20. <sup>13</sup>C NMR spectrum of compound 4a

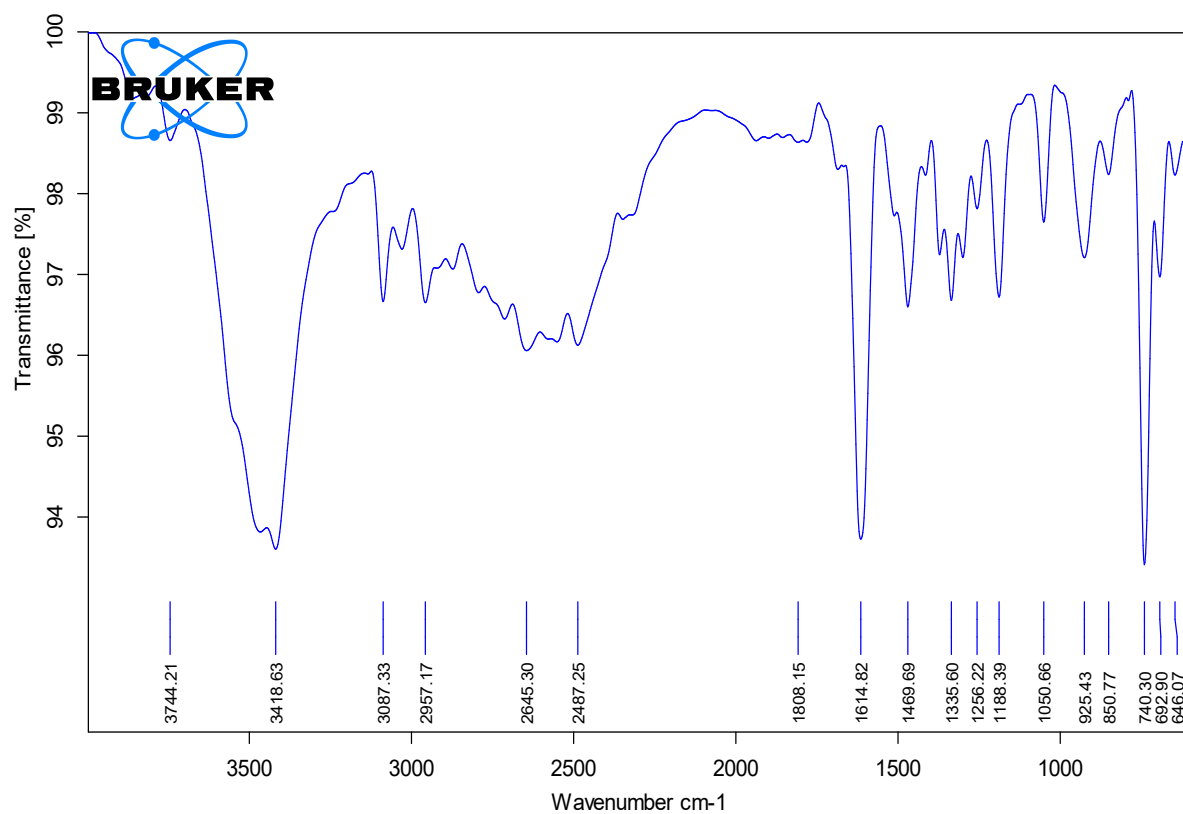

**Figure S21. FT-IR spectrum of compound 4a**

Sample Name : K\_268  
Test Name :  
13012022\_K\_268 31 (0.667)

IITRPR

XEVO G2-XS QTOF

1: TOF MS ES+  
1.47e+007

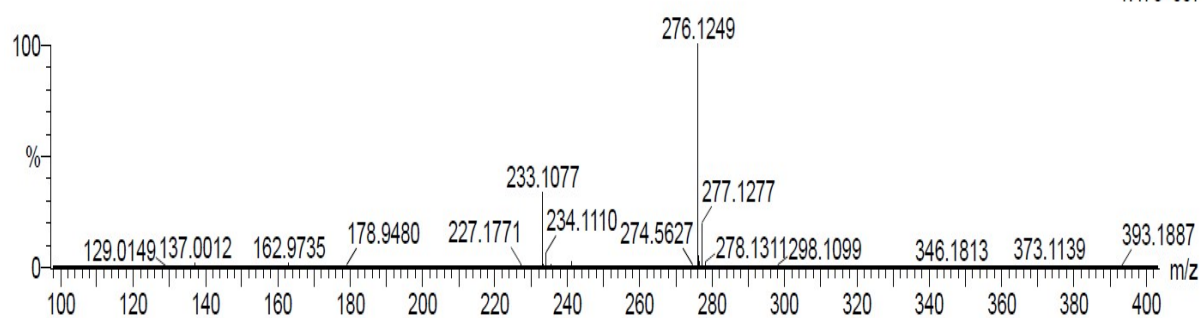

**Figure S22. HRMS spectrum of compound 4a**

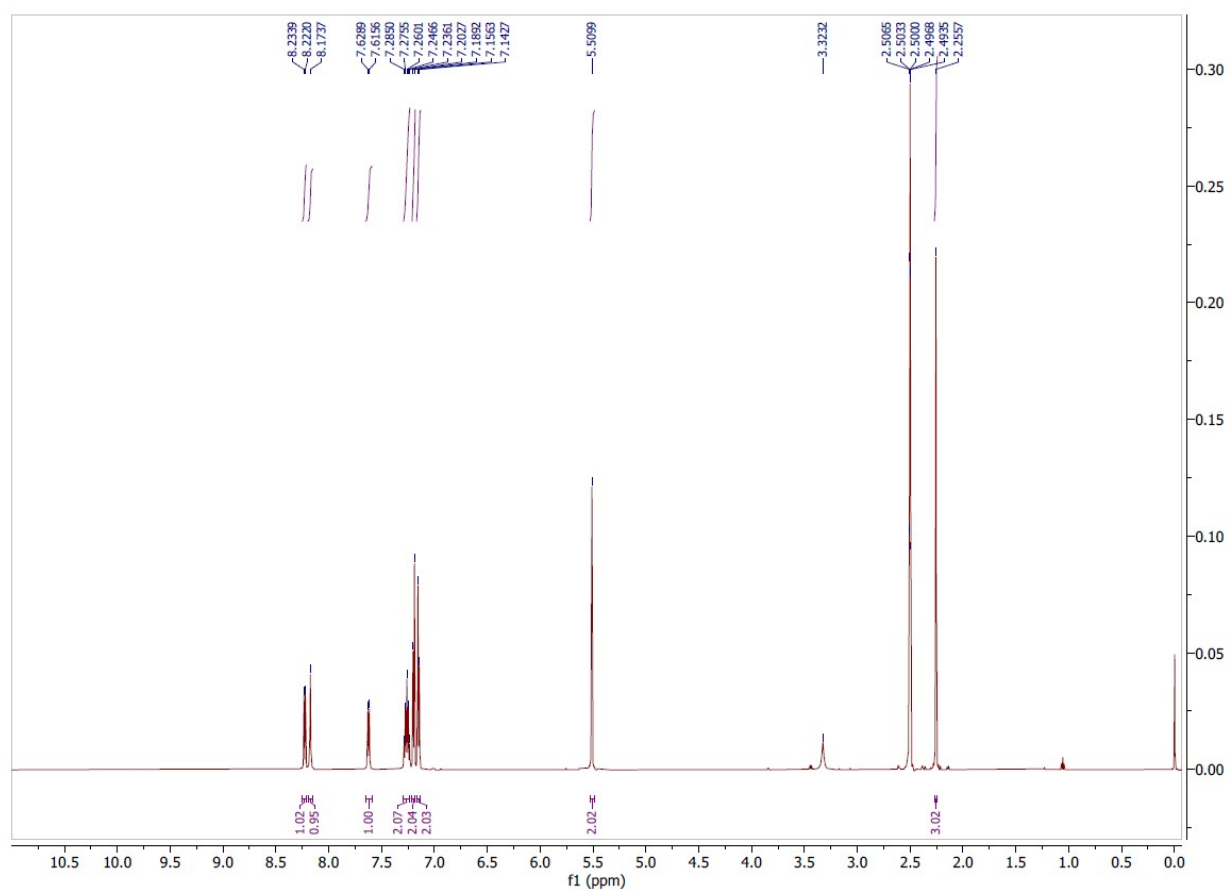

Figure S23. <sup>1</sup>H NMR spectrum of compound 4b



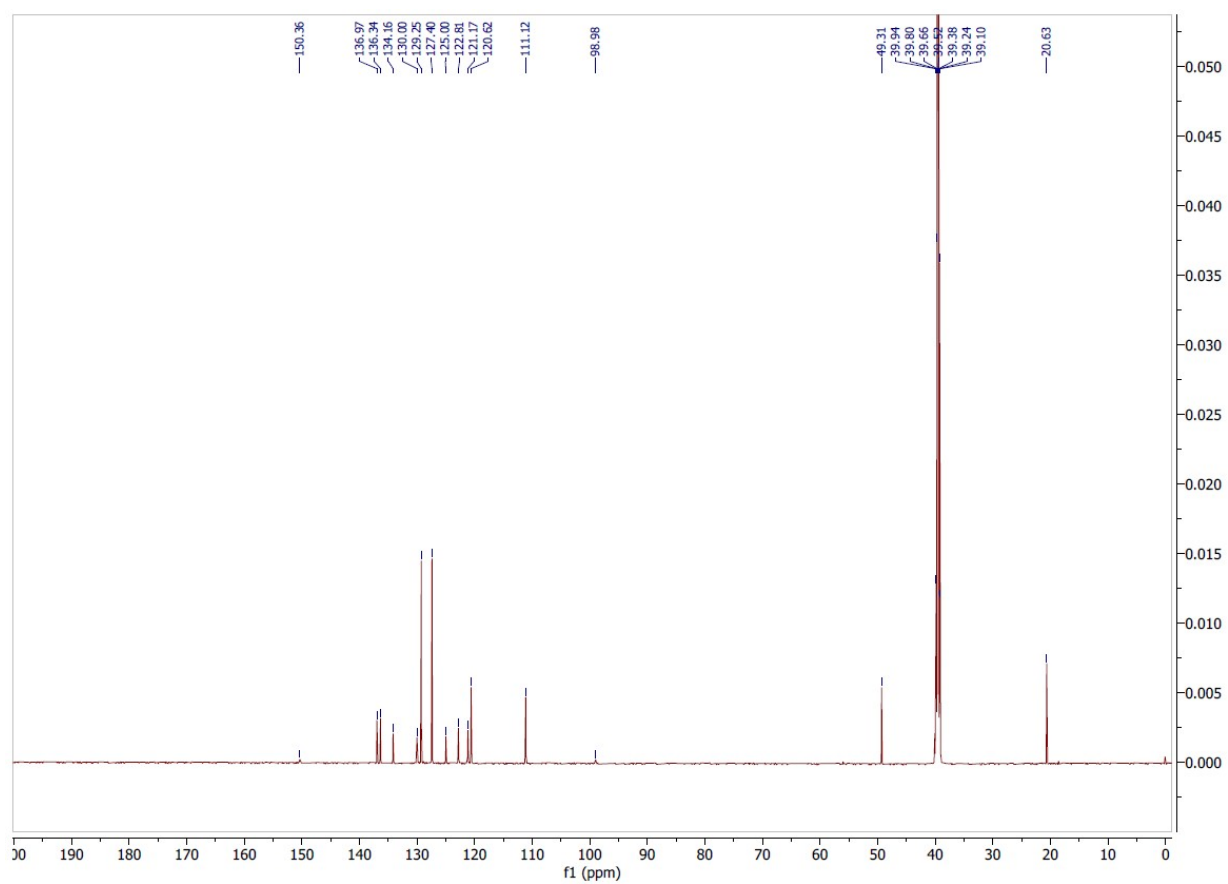

Figure S24.  $^{13}\text{C}$  NMR spectrum of compound 4b

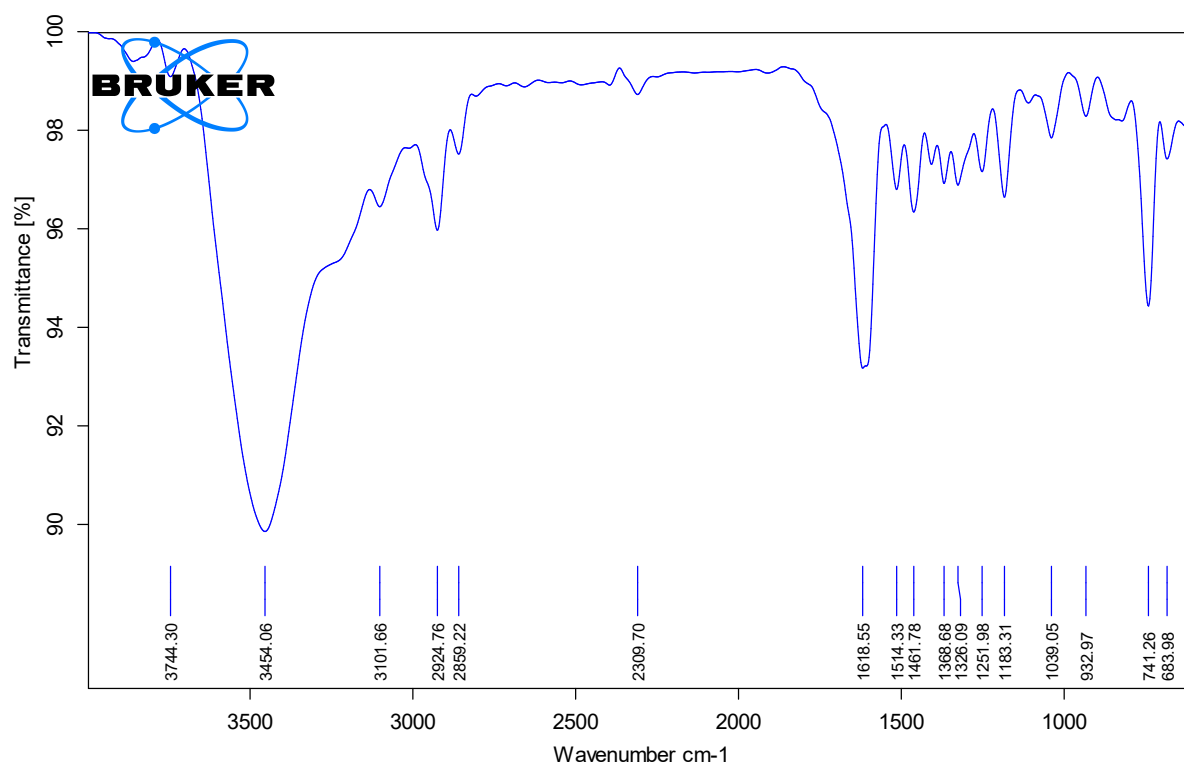

**Figure S25. FT-IR spectrum of compound 4b**

Sample Name : K\_359  
Test Name :  
060822\_K\_359 25 (0.277)

IITRPR

XEVO G2-XS QTOF

1: TOF MS ES+  
4.13e+007

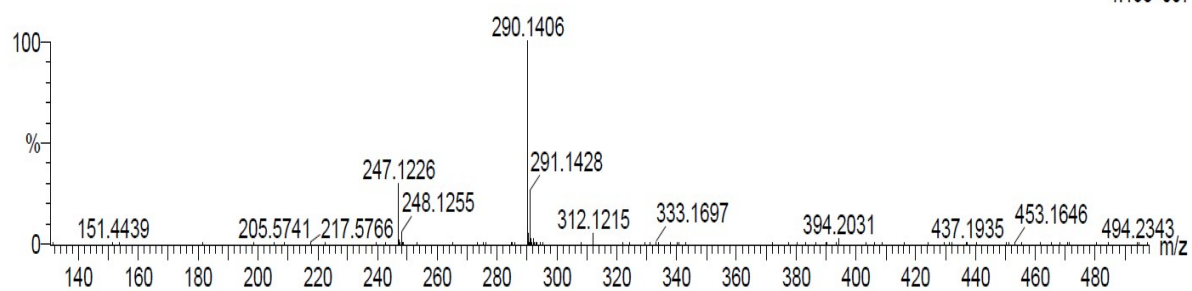

**Figure S26. HRMS spectrum of compound 4b**

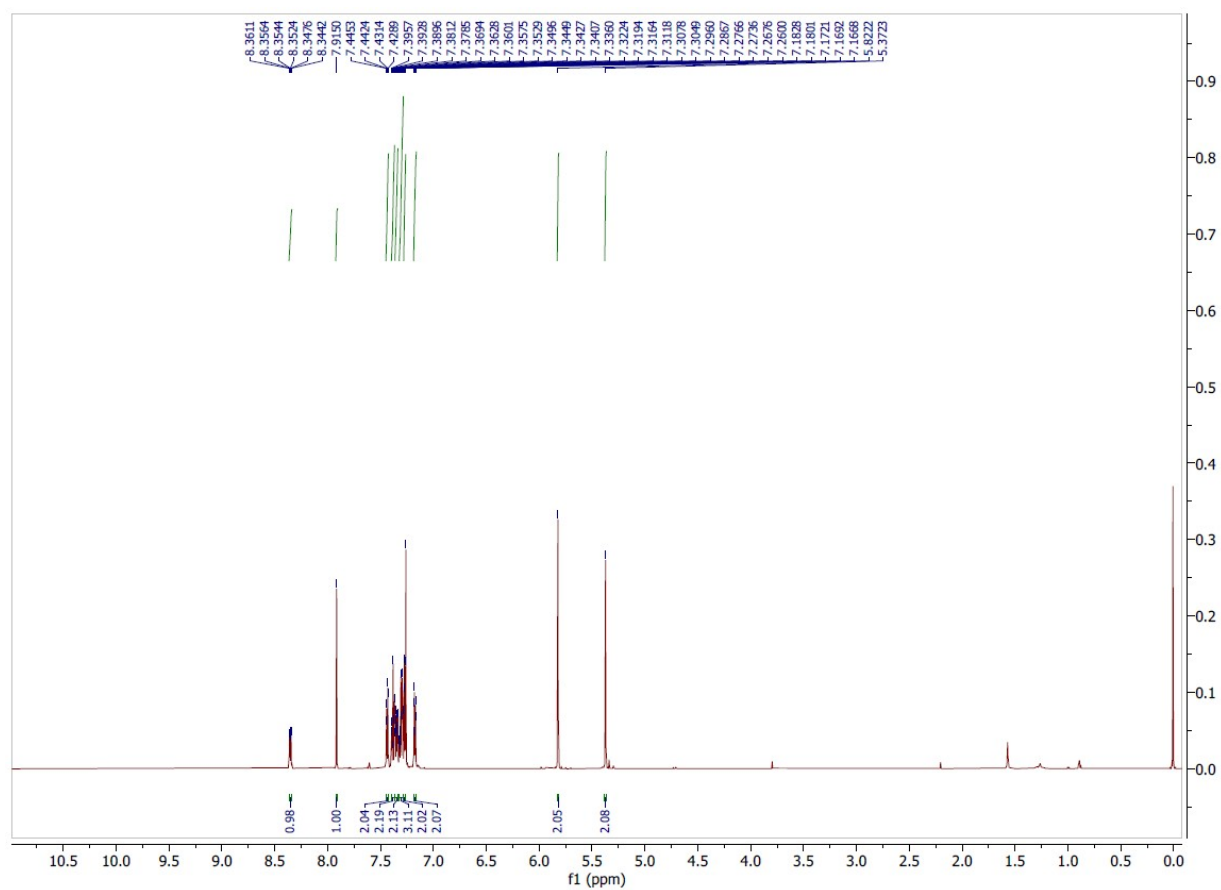

Figure S27. <sup>1</sup>H NMR spectrum of compound 5a

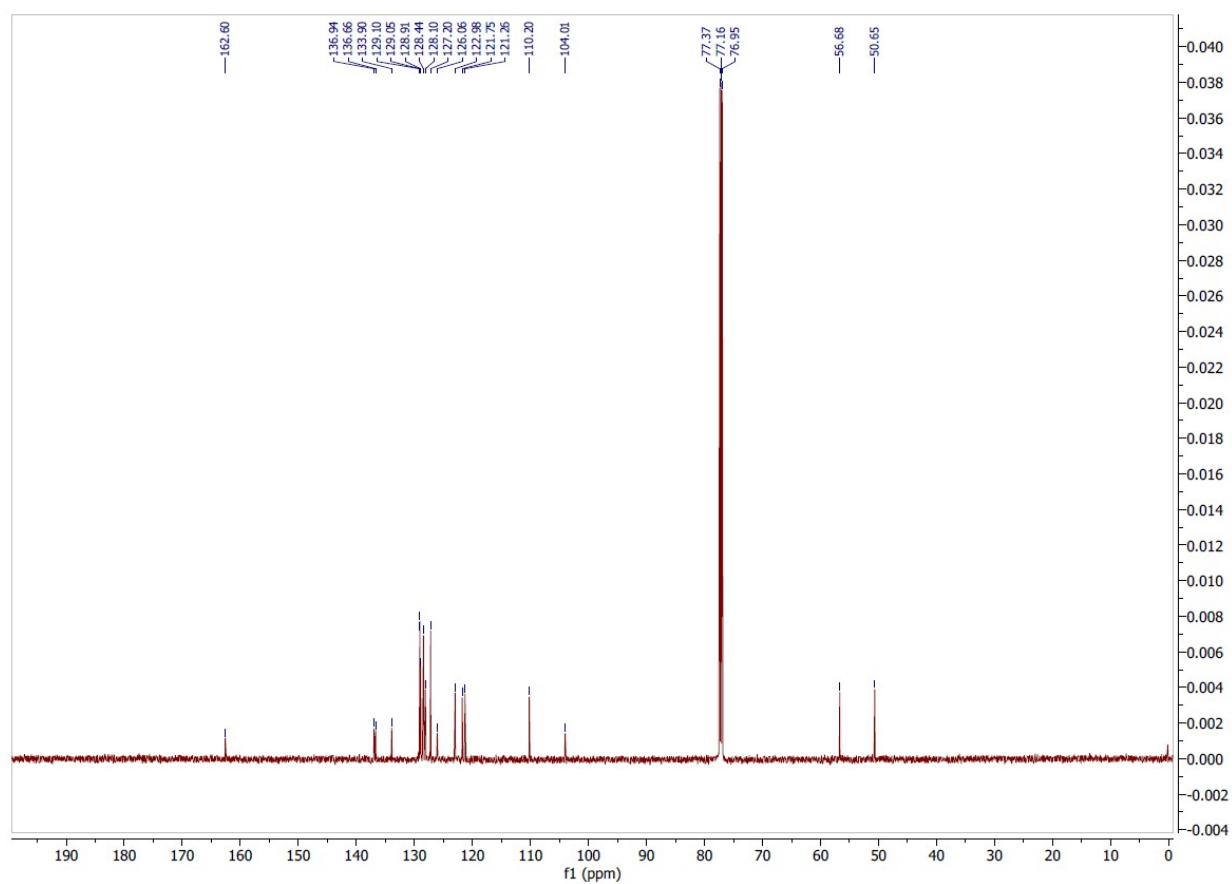

Figure S28. <sup>13</sup>C NMR spectrum of compound 5a

Sample Name : K\_287  
Test Name :  
13012022\_K\_287 31 (0.667)

IITRPR

XEVO G2-XS QTOF

1: TOF MS ES+  
2.00e+007

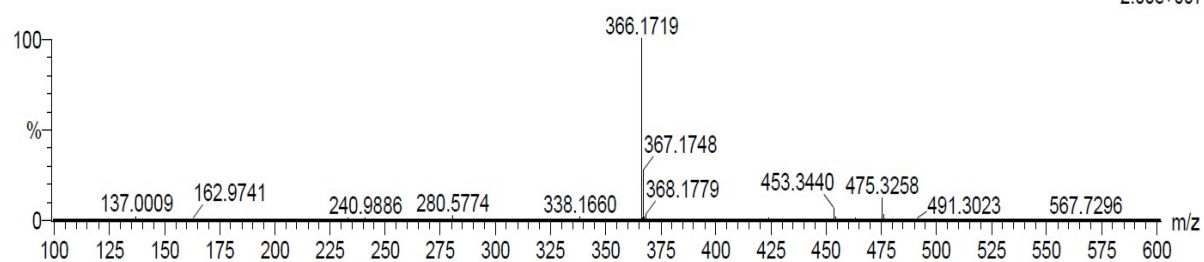

**Figure S29. HRMS spectrum of compound 5a**

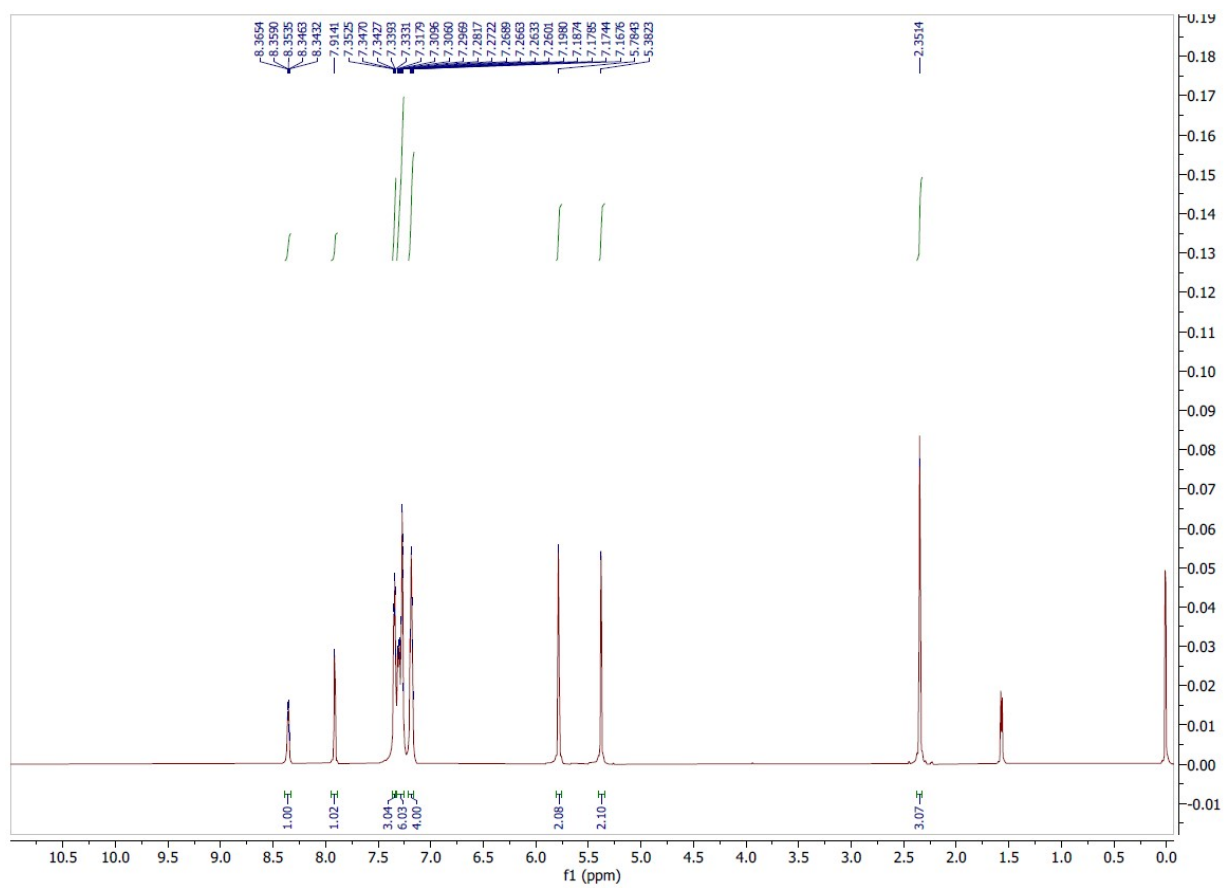

Figure S30. <sup>1</sup>H NMR spectrum of compound 5b



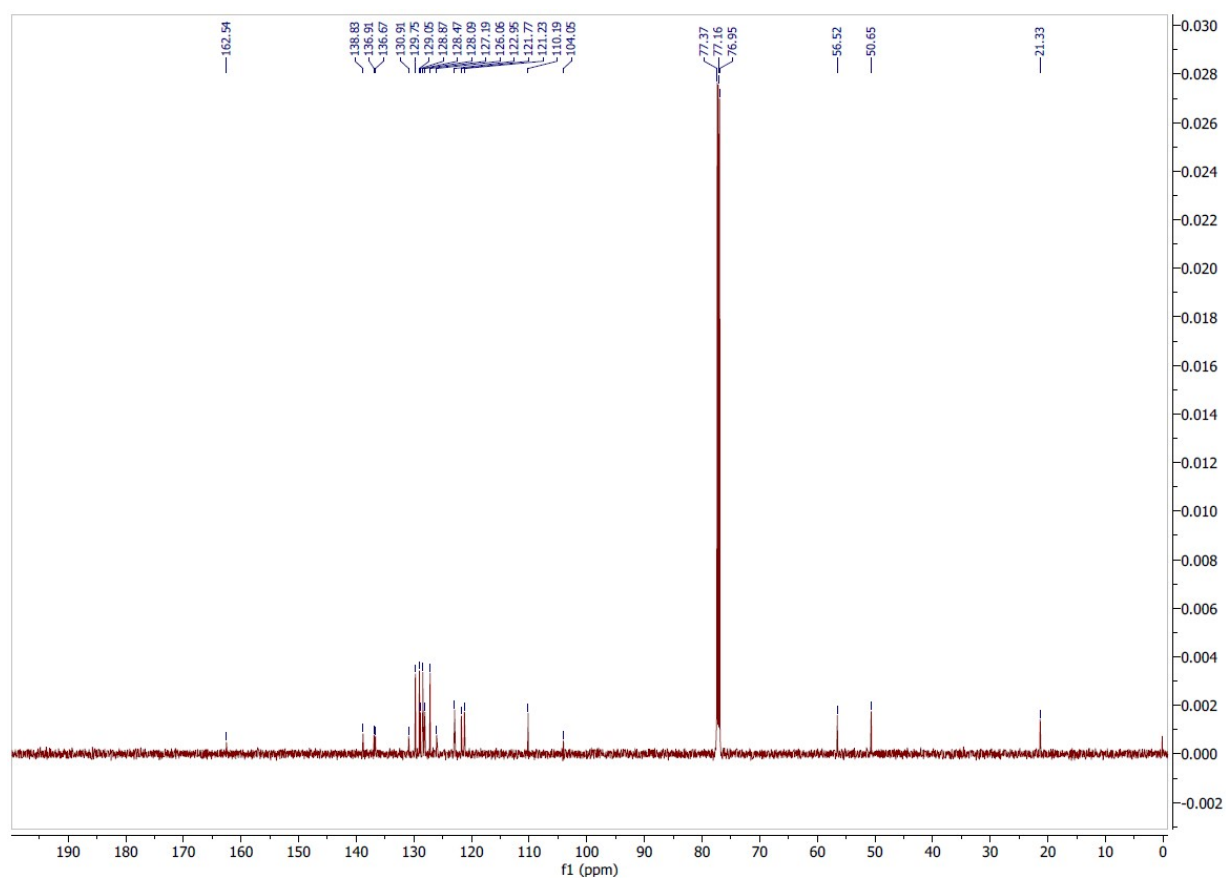

Figure S31. <sup>13</sup>C NMR spectrum of compound 5b

Sample Name : K\_276  
Test Name :  
13012022\_K\_276 29 (0.622)

IITRPR

XEVO G2-XS QTOF

1: TOF MS ES+  
1.86e+007

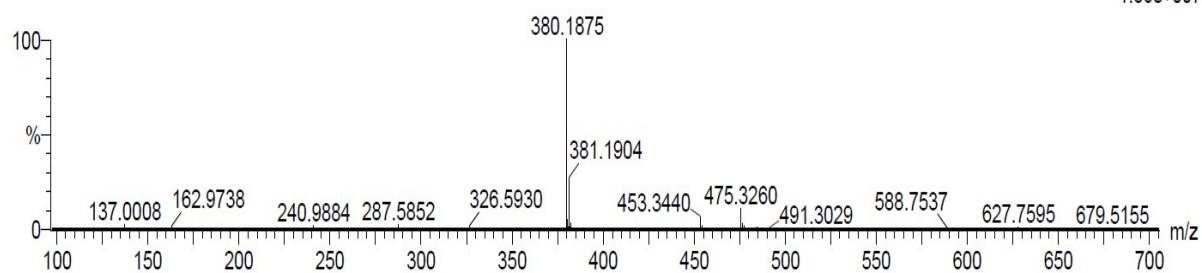

**Figure S32. HRMS spectrum of compound 5b**

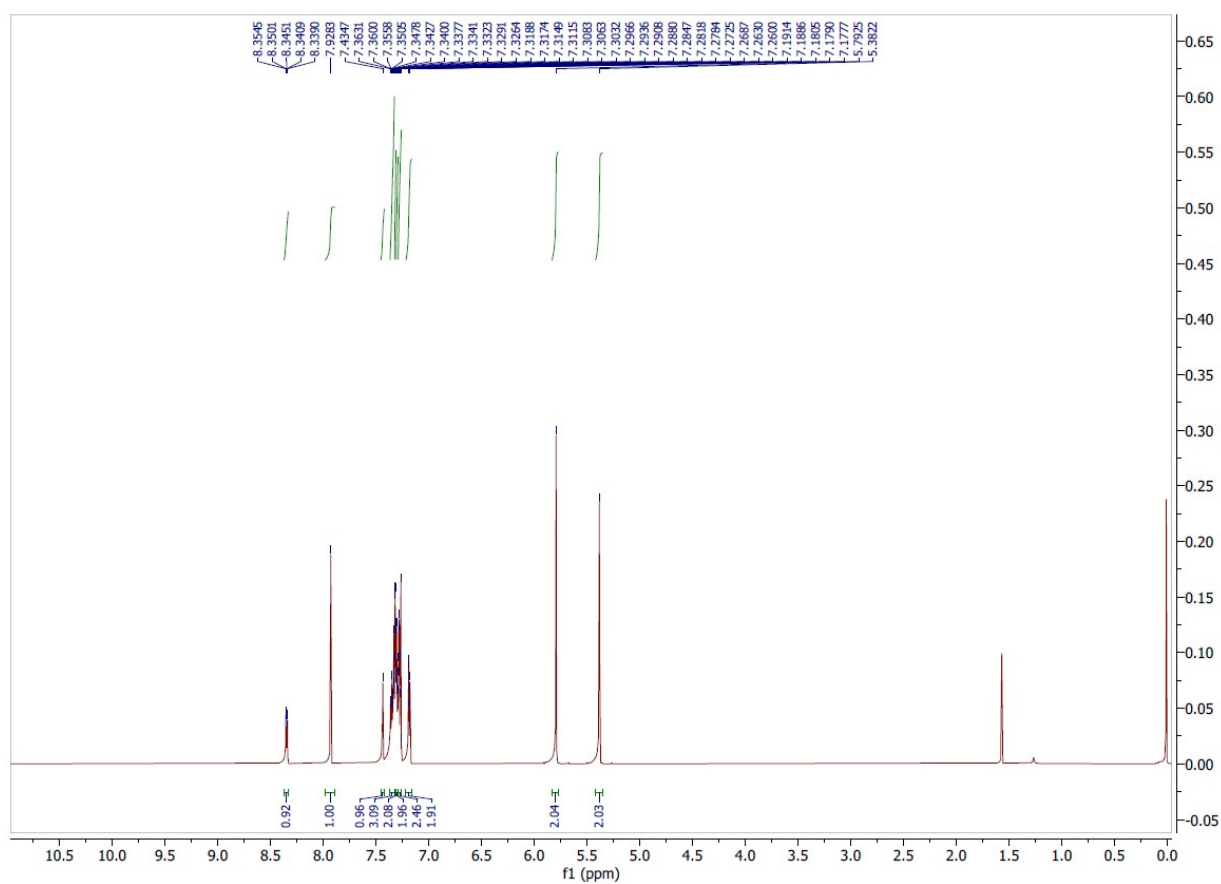

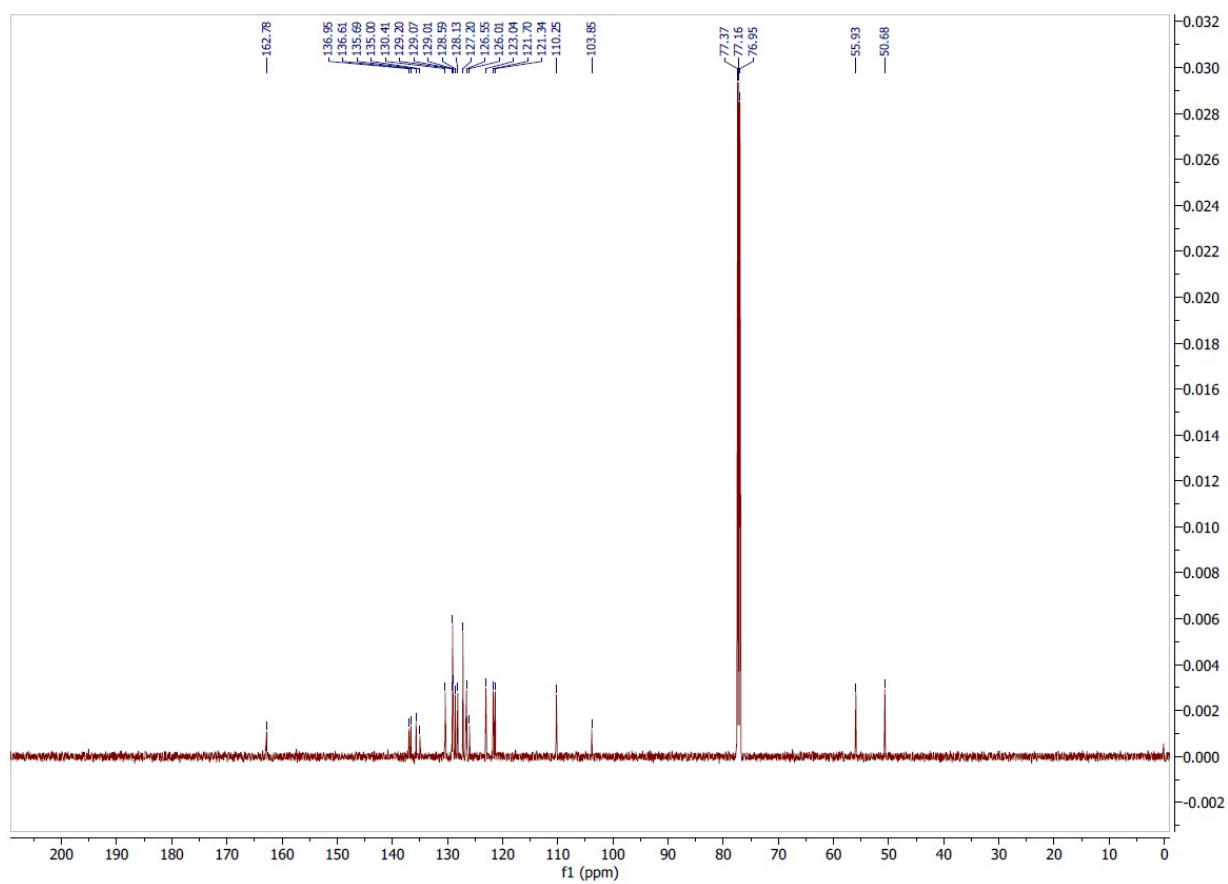

Figure S34. <sup>13</sup>C NMR spectrum of compound 5c

Sample Name : K\_277  
Test Name :  
13012022\_K\_277 18 (0.390)

IITRPR

XEVO G2-XS QTOF

1: TOF MS ES+  
5.38e+006

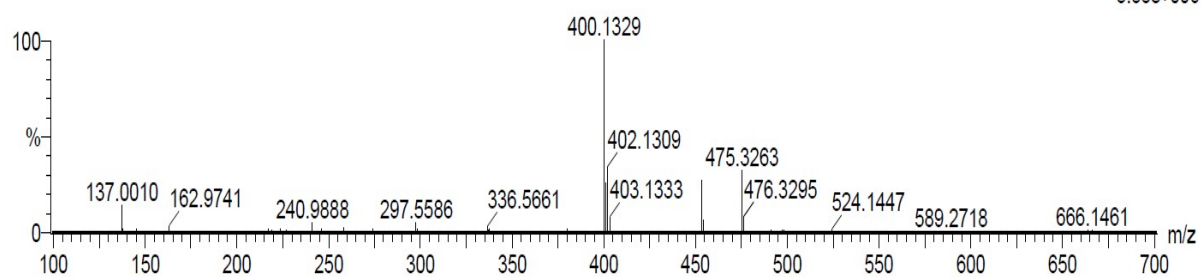

**Figure S35. HRMS spectrum of compound 5c**

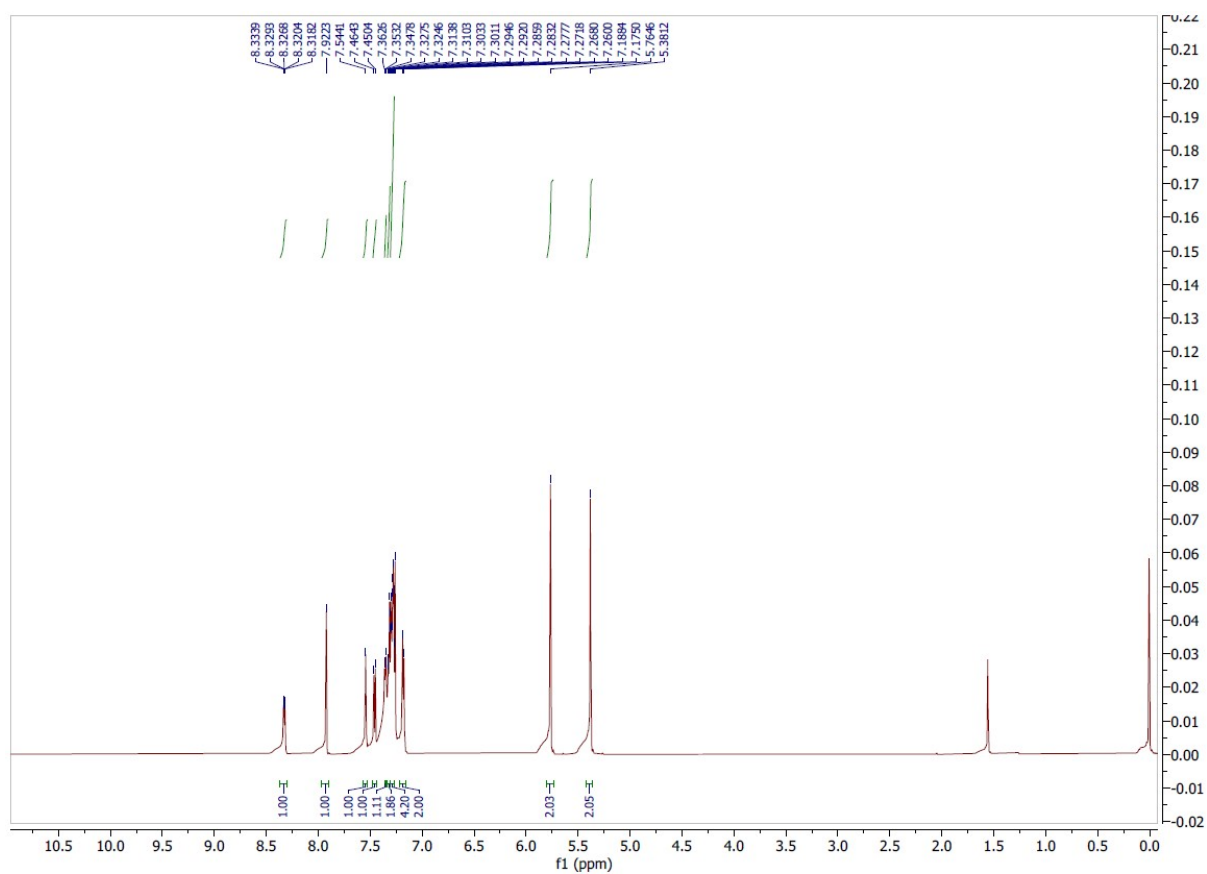

Figure S36. <sup>1</sup>H NMR spectrum of compound 5d

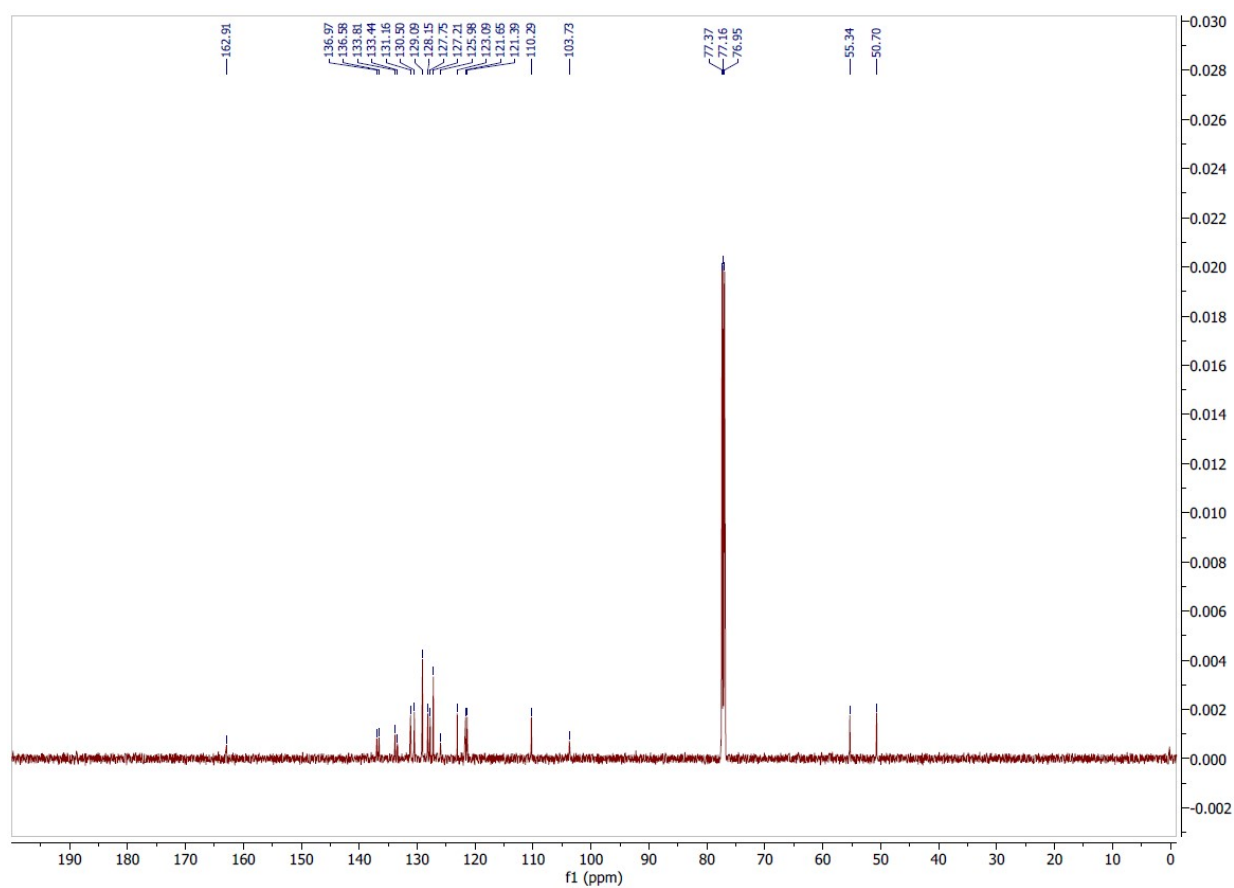

Figure S37. <sup>13</sup>C NMR spectrum of compound 5d

Sample Name : K\_272  
Test Name :  
03012022\_K\_272 10 (0.232)

IITRPR

XEVO G2-XS QTOF

1: TOF MS ES+  
1.94e+007

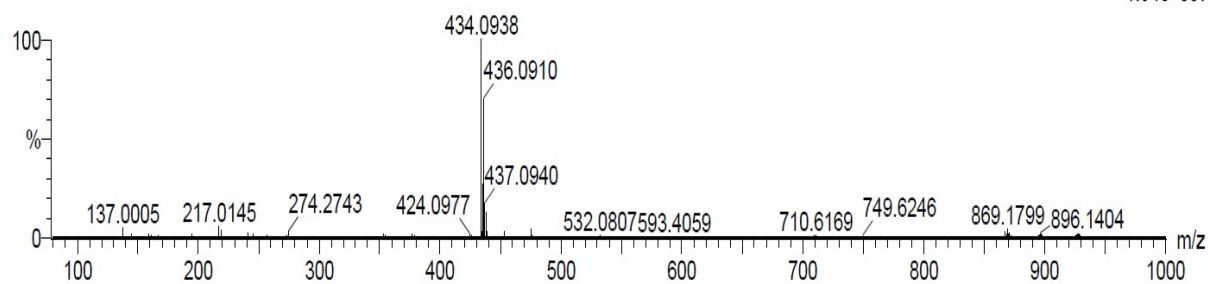

**Figure S38. HRMS spectrum of compound 5d**



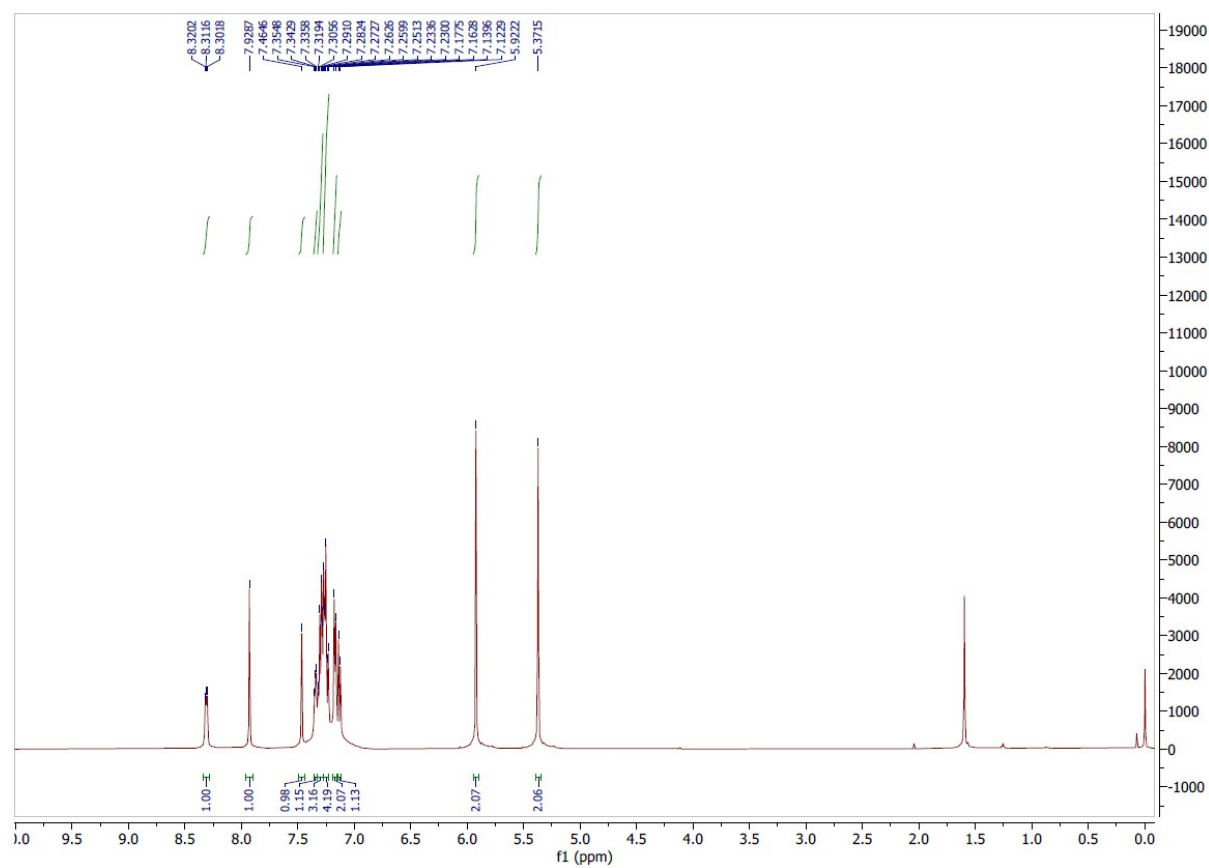

Figure S39.  $^1\text{H}$  NMR spectrum of compound 5e

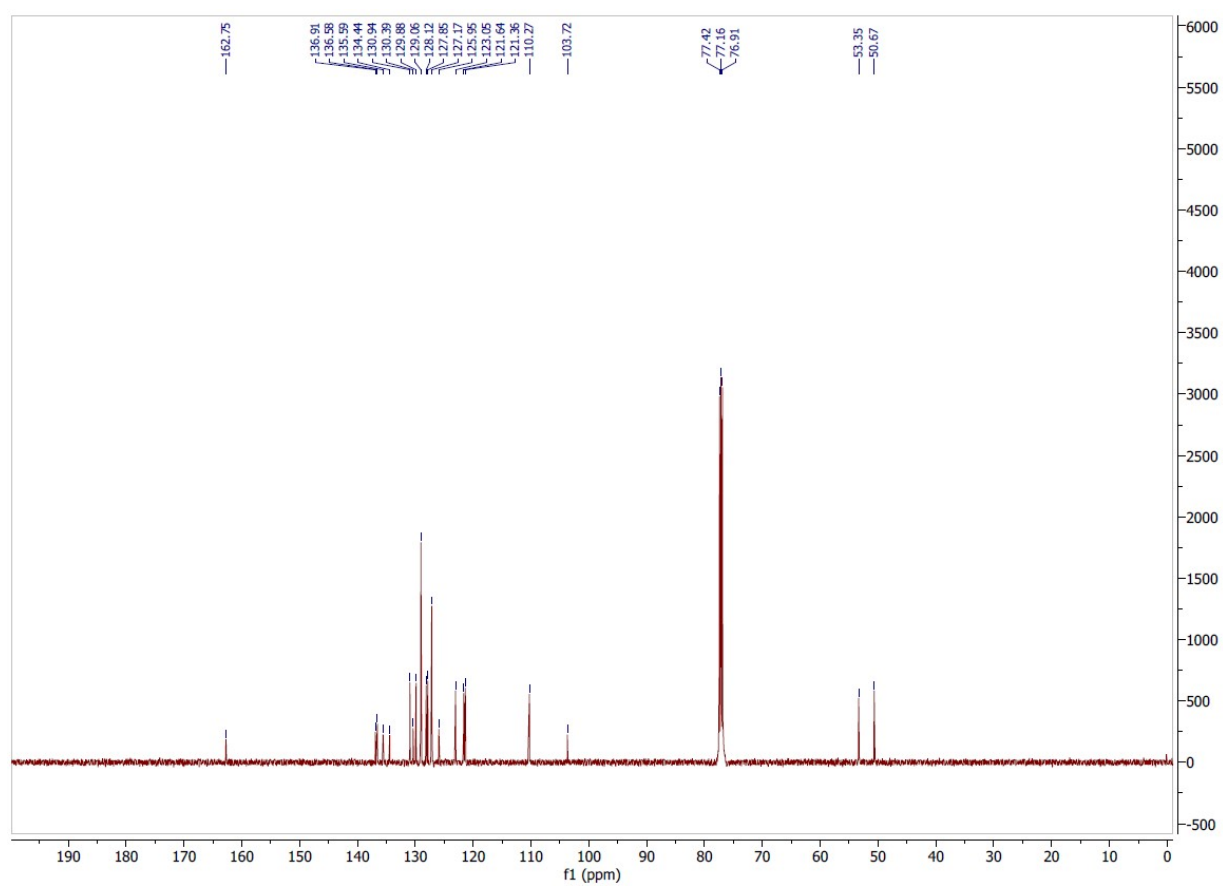

Figure S40.  $^{13}\text{C}$  NMR spectrum of compound 5e

Sample Name : K\_259  
Test Name :  
13012022\_K\_259 8 (0.186)

IITRPR

XEVO G2-XS QTOF

1: TOF MS ES+  
1.72e+007

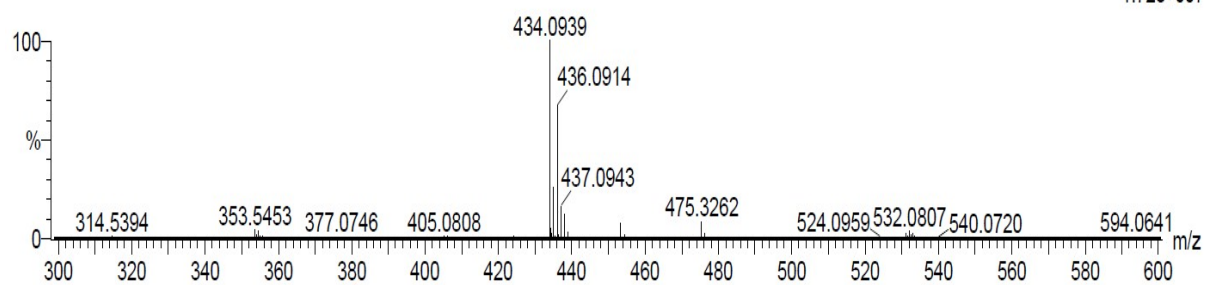

**Figure S41. HRMS spectrum of compound 5e**

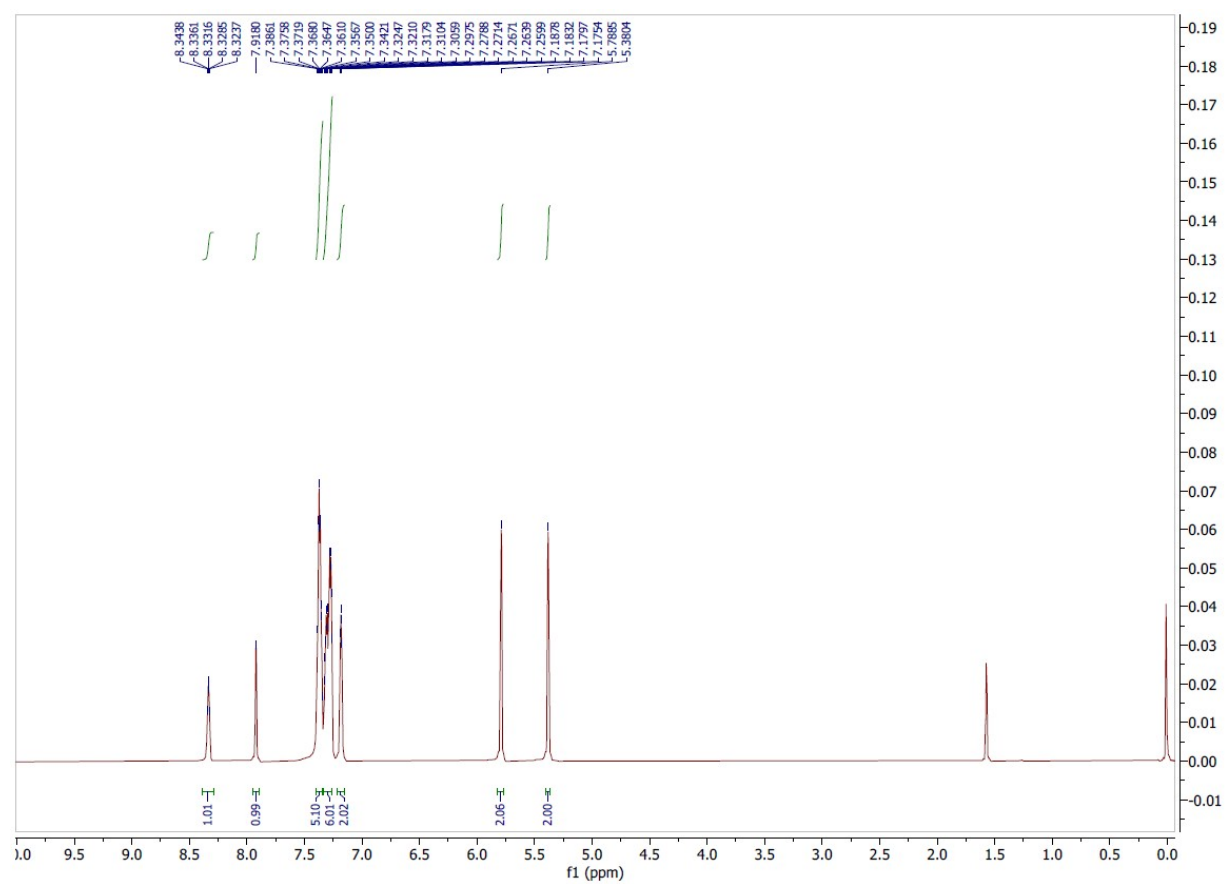

Figure S42.  $^1\text{H}$  NMR spectrum of compound 5f

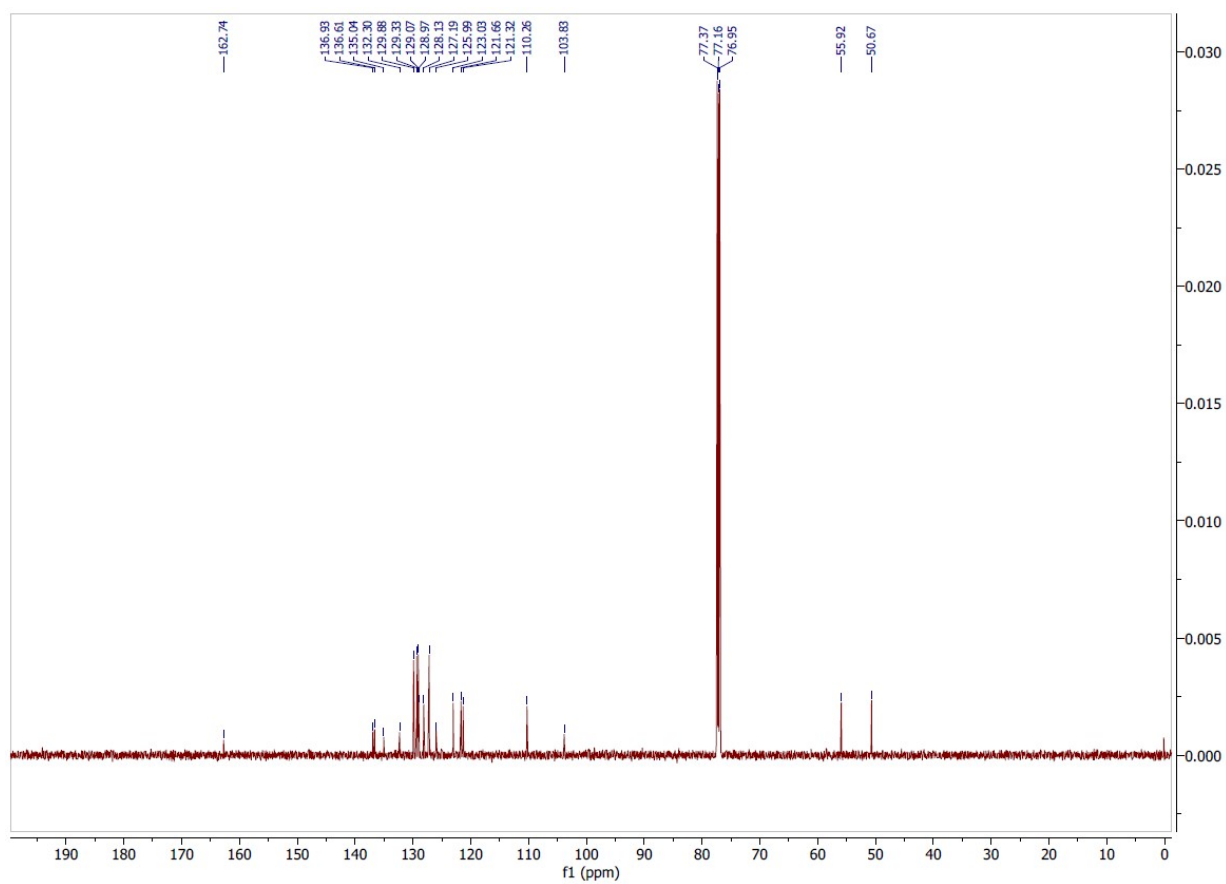

Figure S43.  $^{13}\text{C}$  NMR spectrum of compound 5f

Sample Name : K\_278  
Test Name :  
13012022\_K\_278 13 (0.294)

IITRPR

XEVO G2-XS QTOF

1: TOF MS ES+  
1.89e+007

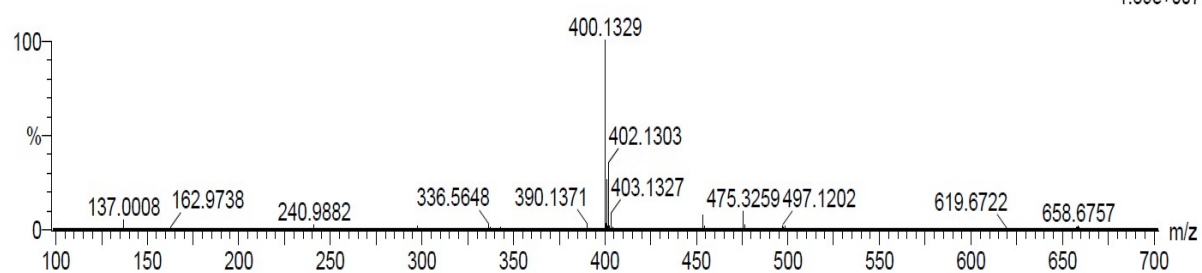

**Figure S44. HRMS spectrum of compound 5f**

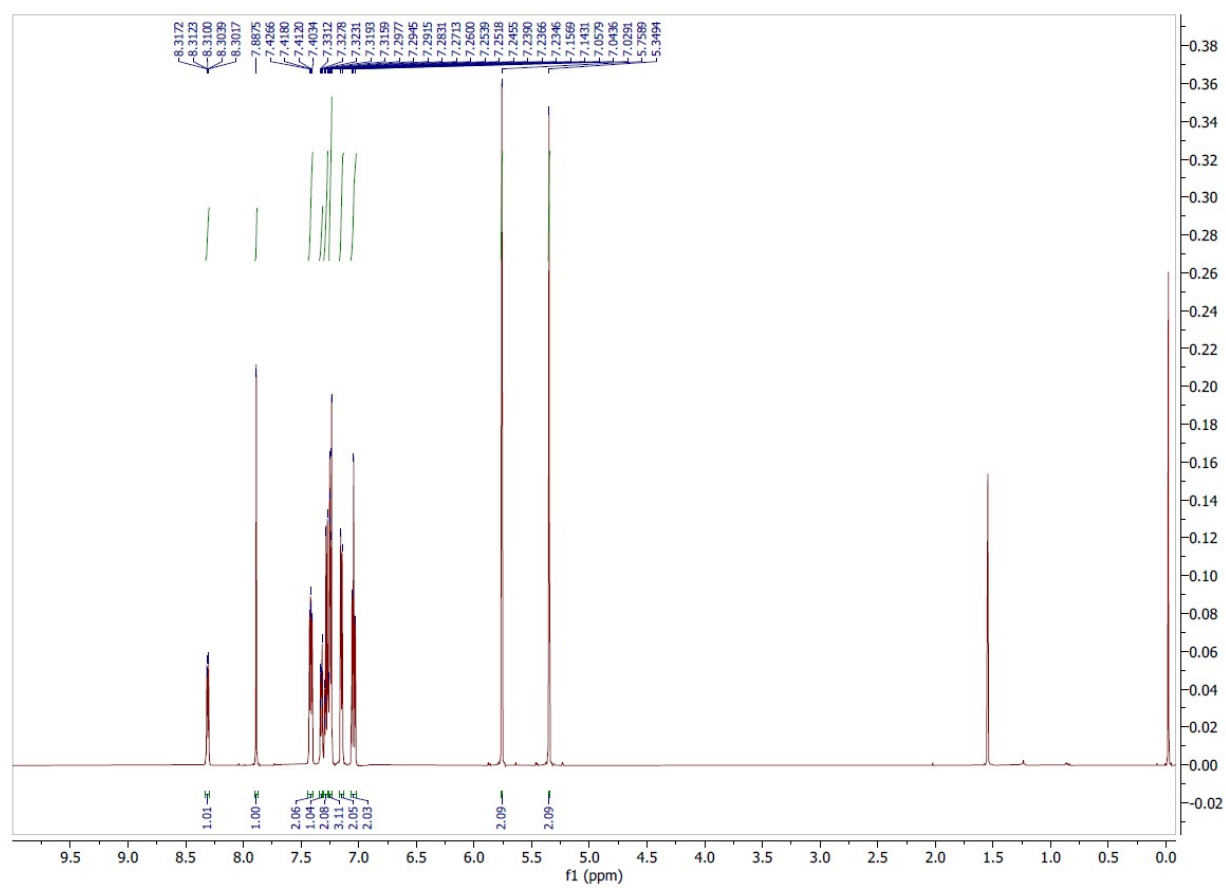

Figure S45.  $^1\text{H}$  NMR spectrum of compound 5g

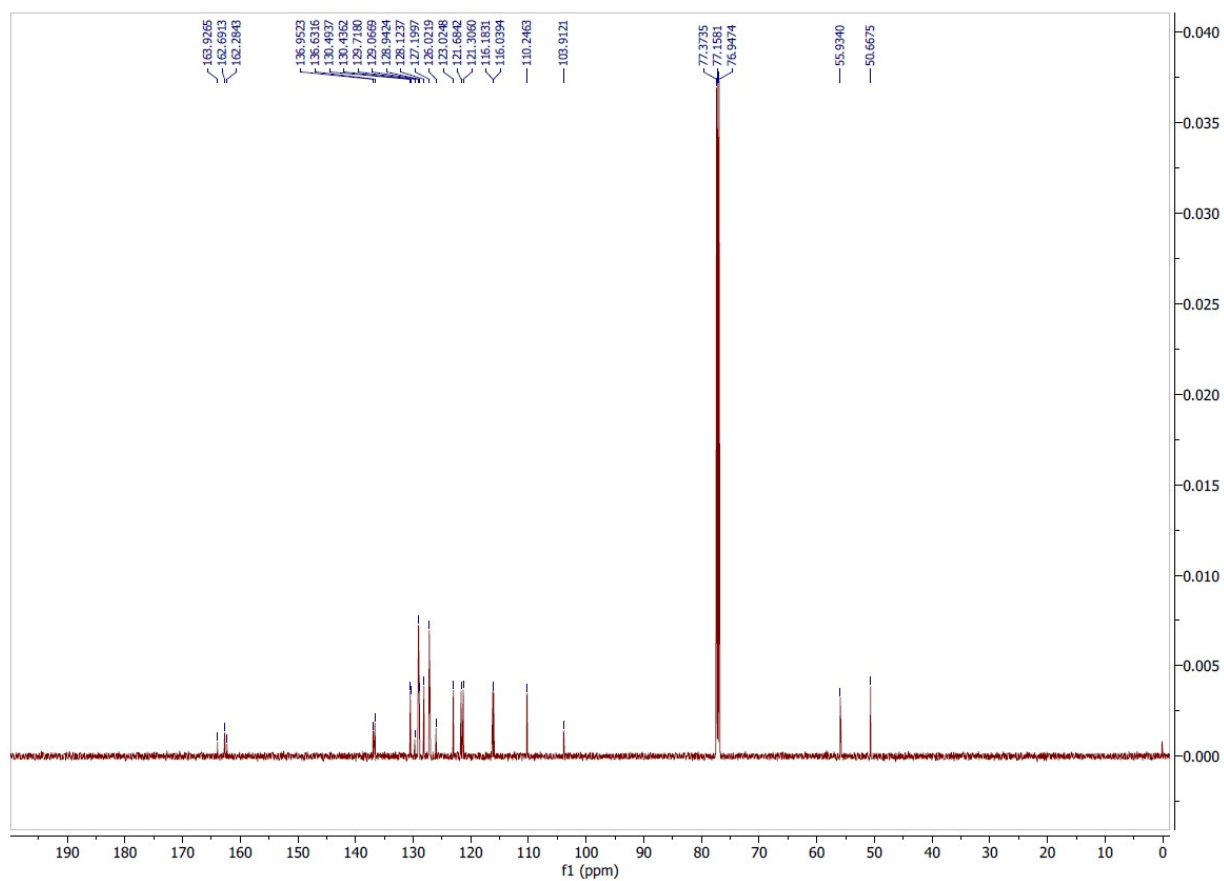

Figure S46. <sup>13</sup>C NMR spectrum of compound 5g



Sample Name : K\_279  
Test Name :  
13012022\_K\_279 30 (0.639)

IITRPR

XEVO G2-XS QTOF

1: TOF MS ES+  
1.78e+007

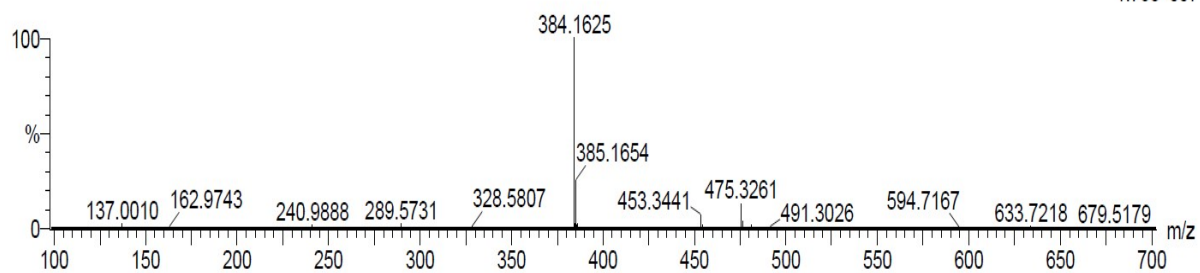

**Figure S47. HRMS spectrum of compound 5g**

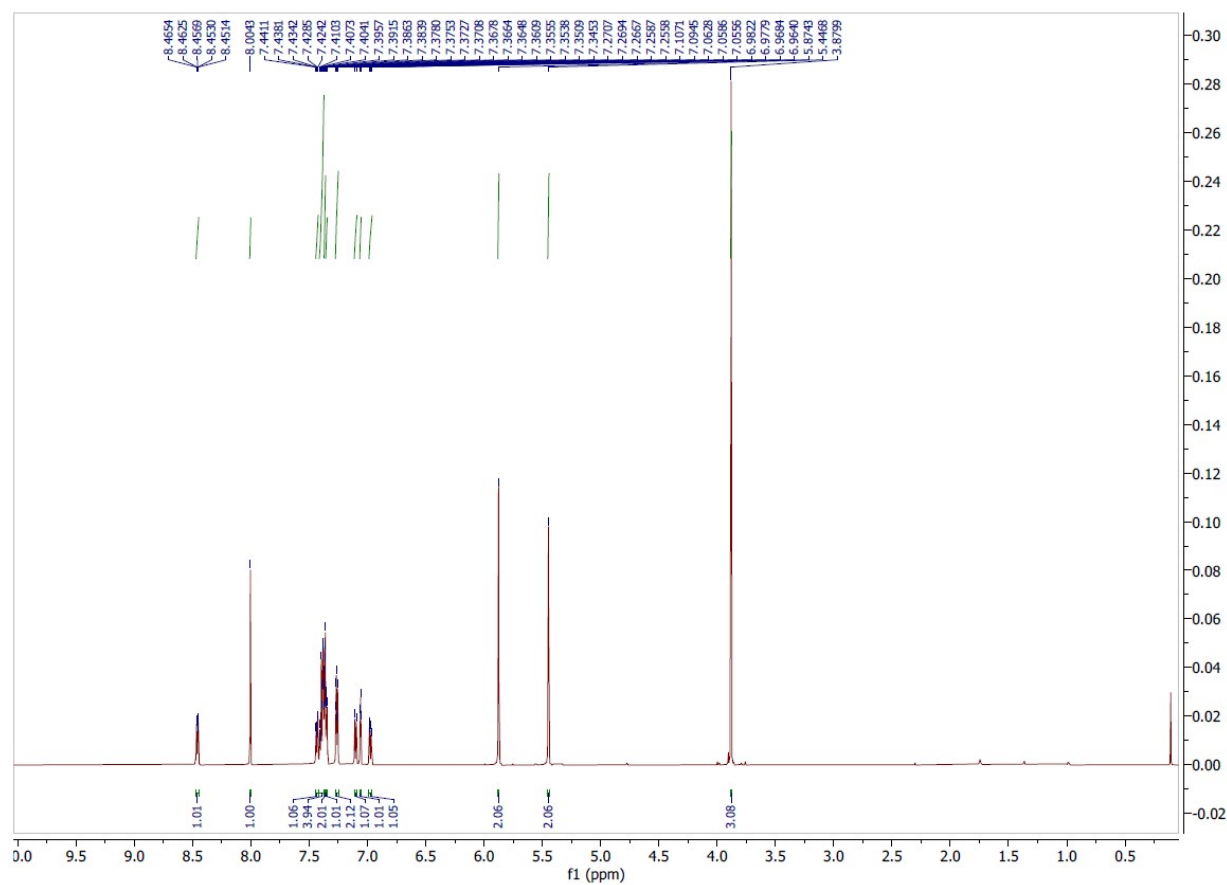

Figure S48.  $^1\text{H}$  NMR spectrum of compound 5h

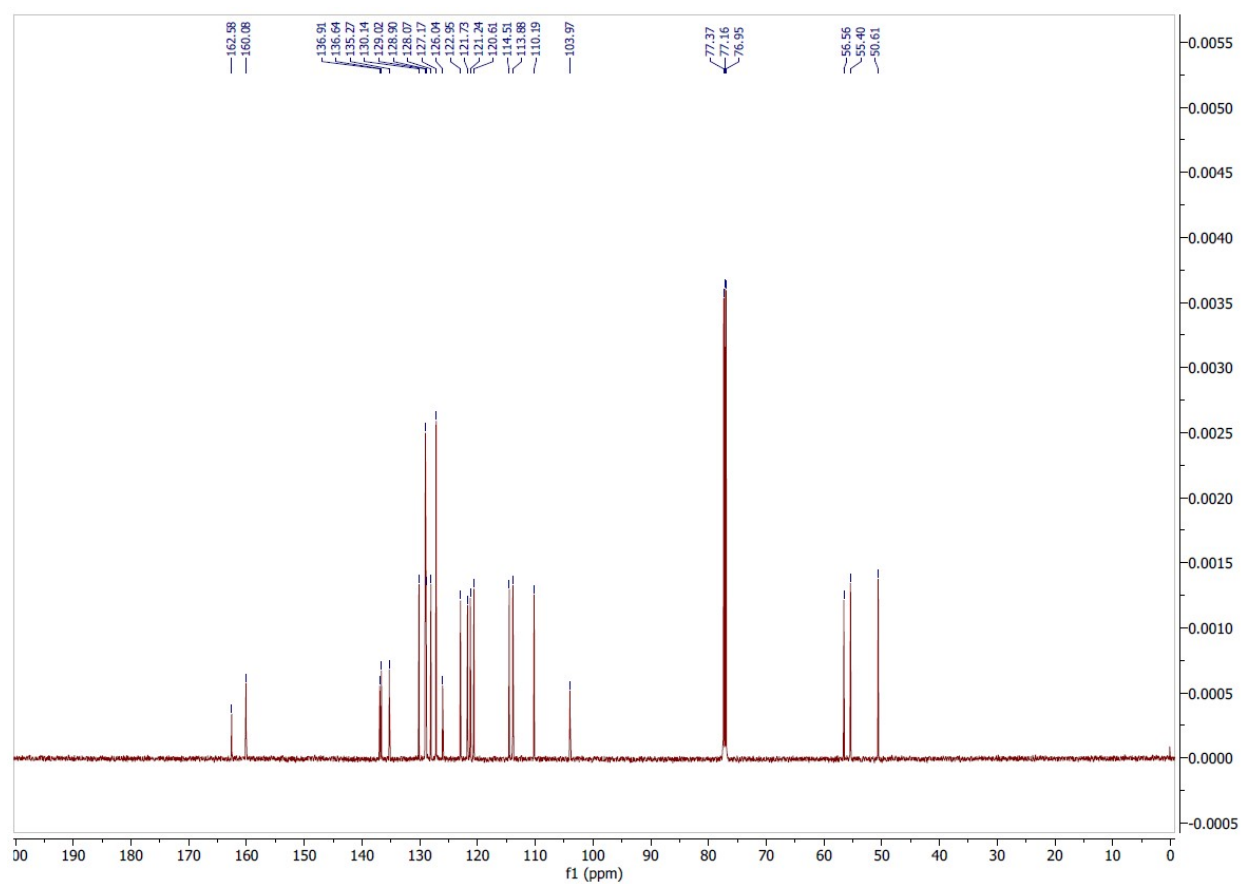

Figure S49. <sup>13</sup>C NMR spectrum of compound 5h

Sample Name : K\_322  
Test Name :  
03012022\_K\_322 33 (0.701)

IITRPR

XEVO G2-XS QTOF

1: TOF MS ES+  
2.17e+007

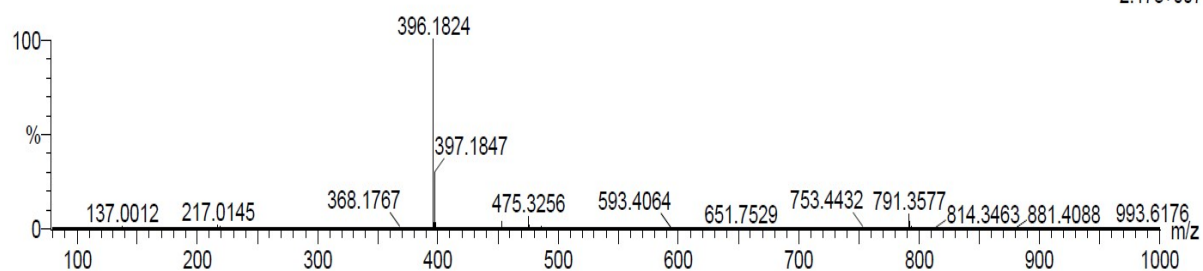

**Figure S50. HRMS spectrum of compound 5h**

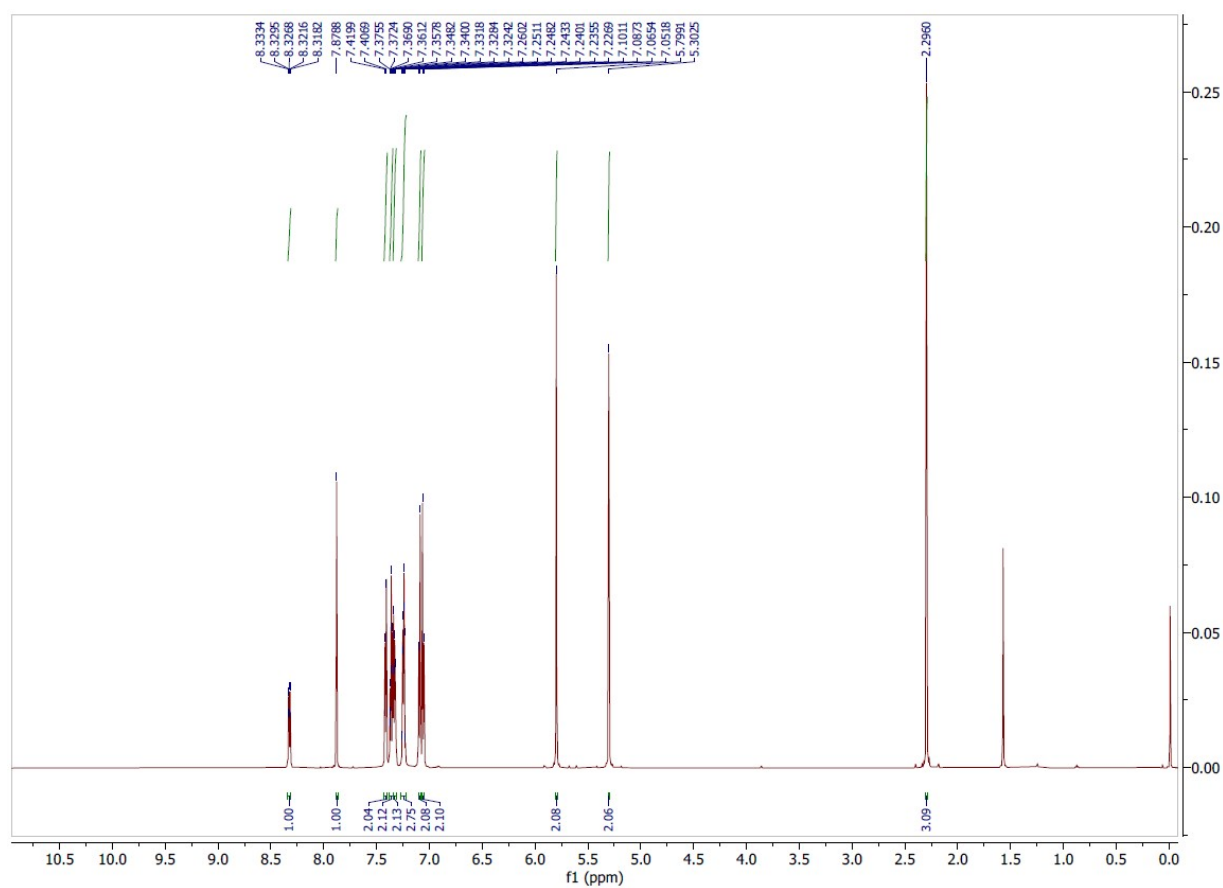

Figure S51. <sup>1</sup>H NMR spectrum of compound 5i

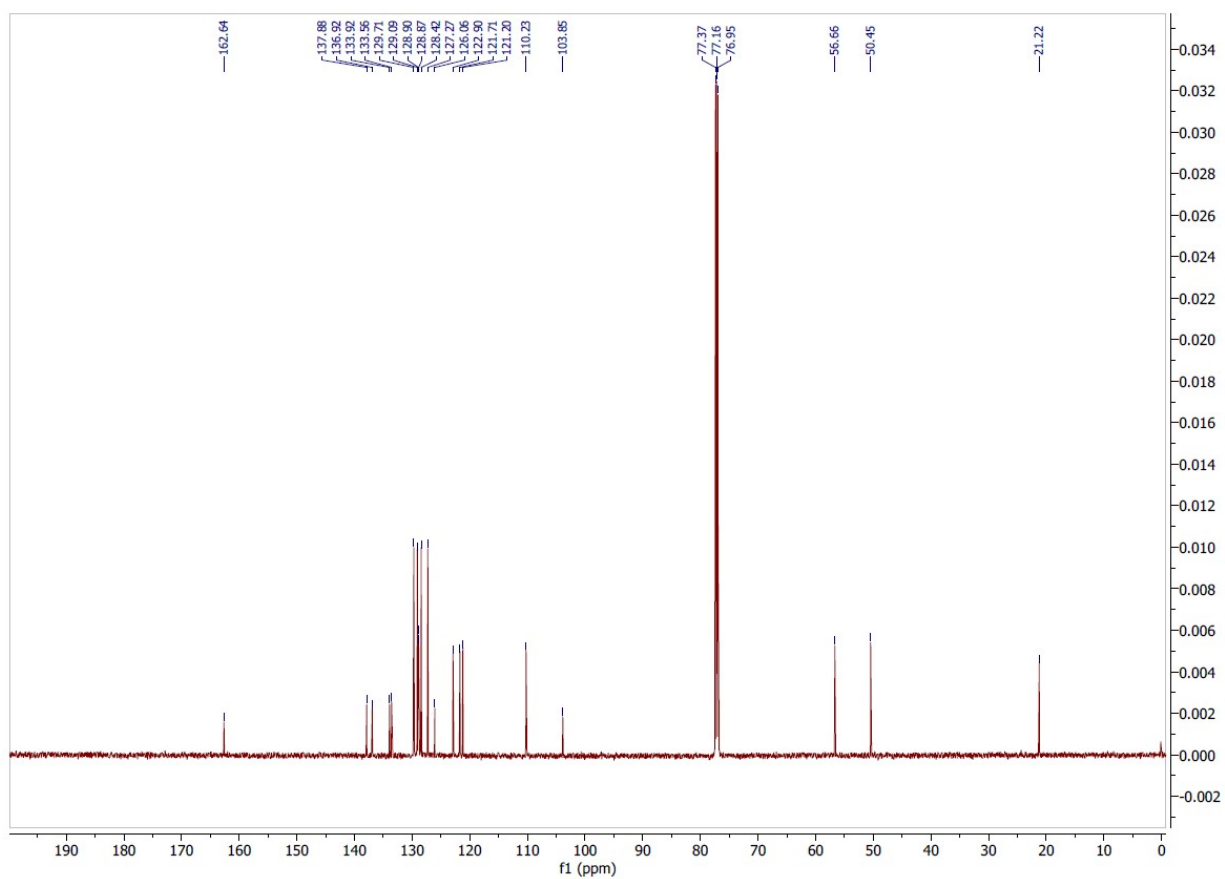

Figure S52.  $^{13}\text{C}$  NMR spectrum of compound 5i

Sample Name : K\_374 a  
Test Name :  
060822\_K\_374 a 33 (0.357)

IITRPR

XEVO G2-XS QTOF

1: TOF MS ES+  
4.51e+007

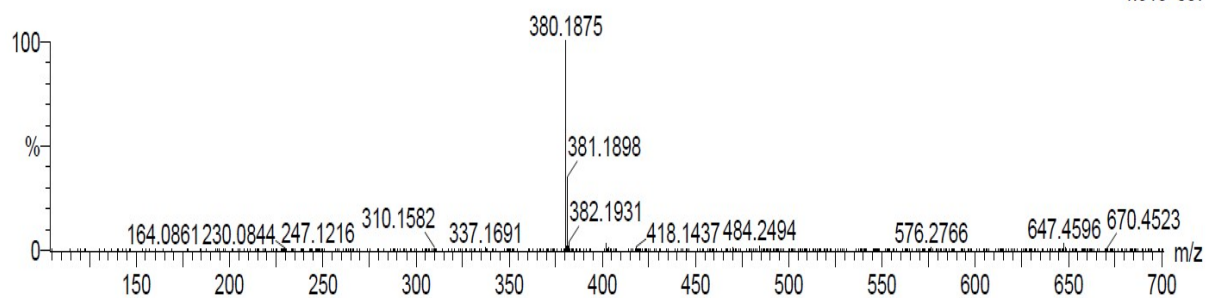

**Figure S53. HRMS spectrum of compound 5i**

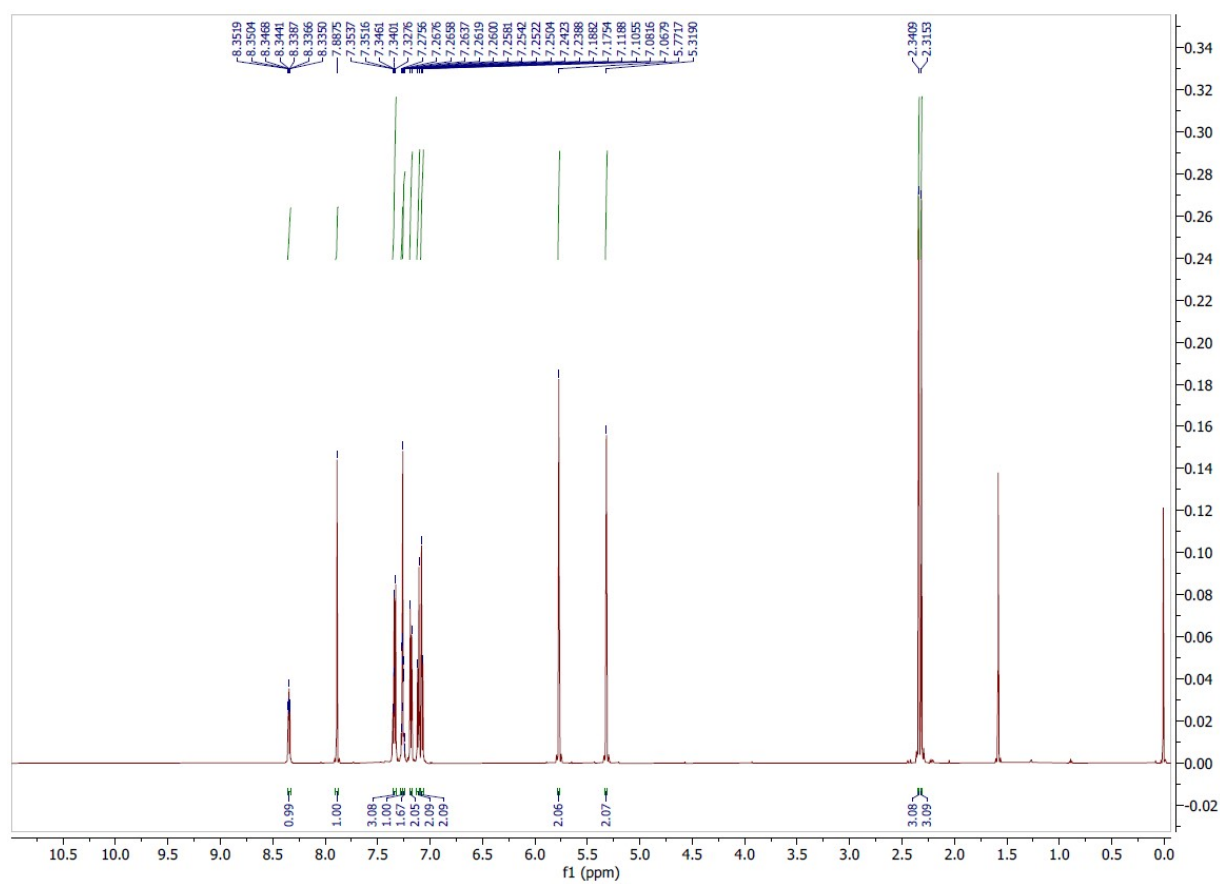

Figure S54. <sup>1</sup>H NMR spectrum of compound 5j



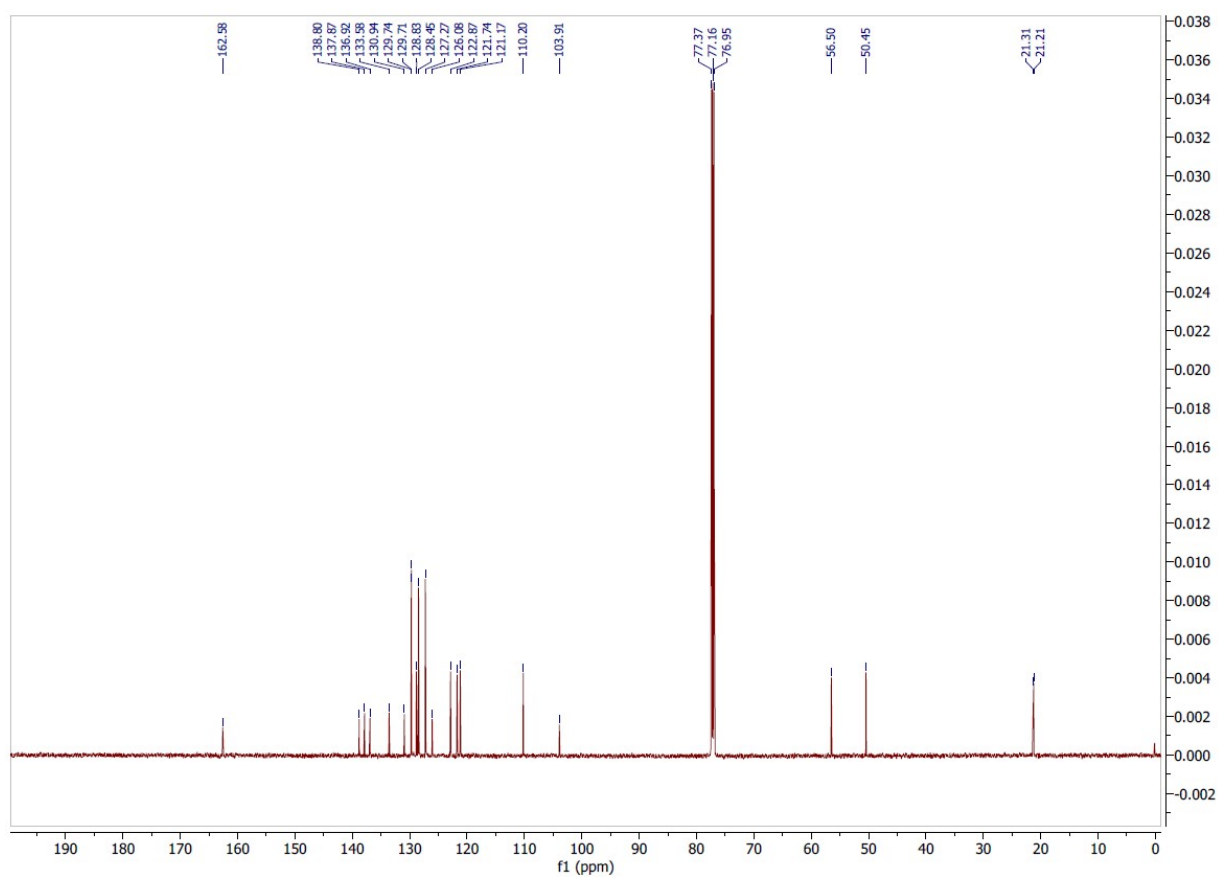

Figure S55. <sup>13</sup>C NMR spectrum of compound 5j

Sample Name : K\_370 a  
Test Name :  
060822\_K\_370 a 28 (0.303)

IITRPR

XEVO G2-XS QTOF

1: TOF MS ES+  
1.03e+007

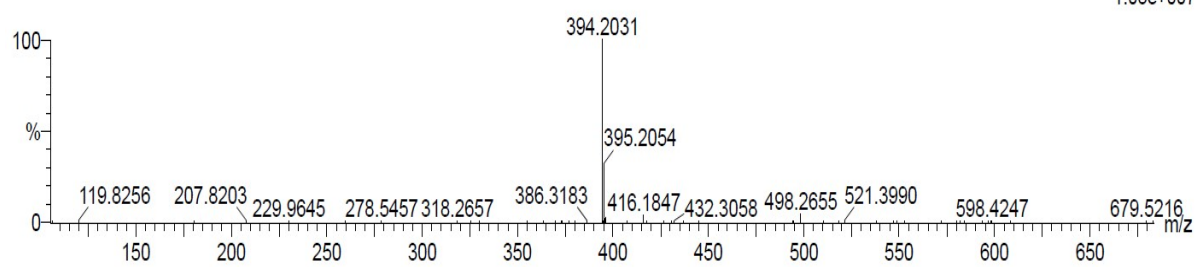

**Figure S56. HRMS spectrum of compound 5j**

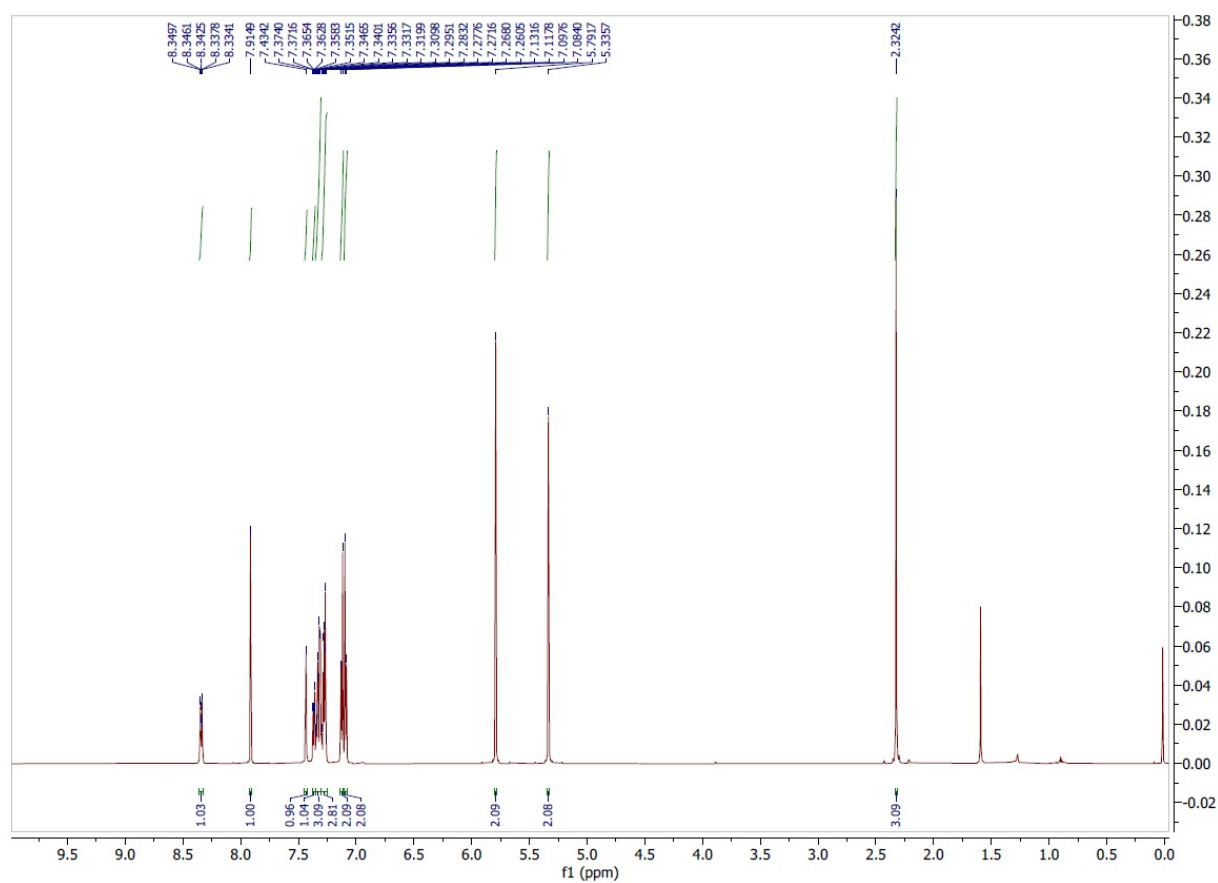

Figure S57. <sup>1</sup>H NMR spectrum of compound 5k

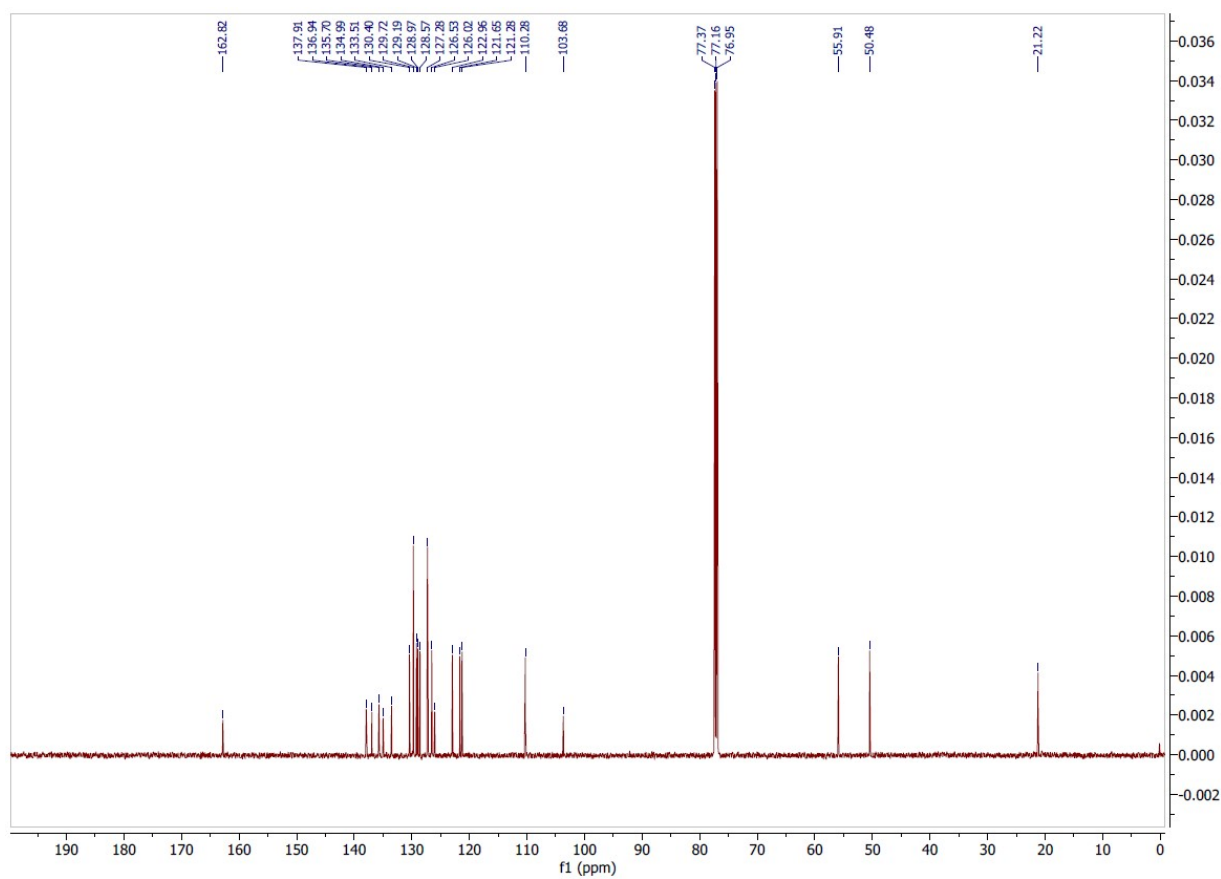

Figure S58. <sup>13</sup>C NMR spectrum of compound 5k

Sample Name : K\_371 a  
Test Name :  
060822\_K\_371 a 24 (0.257)

IITRPR

XEVO G2-XS QTOF

1: TOF MS ES+  
4.96e+007

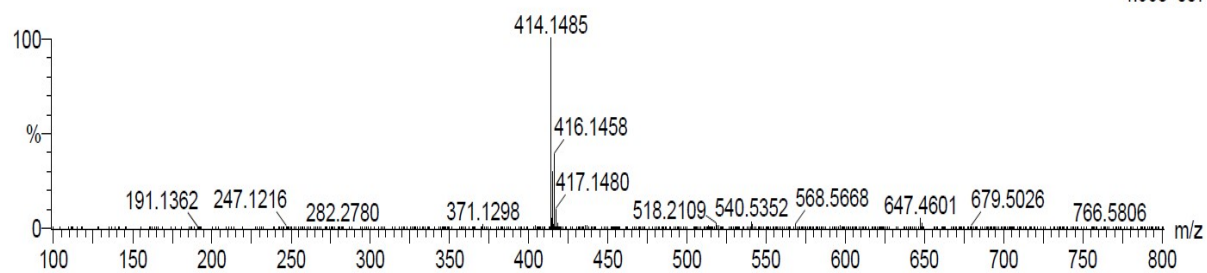

**Figure S59. HRMS spectrum of compound 5k**

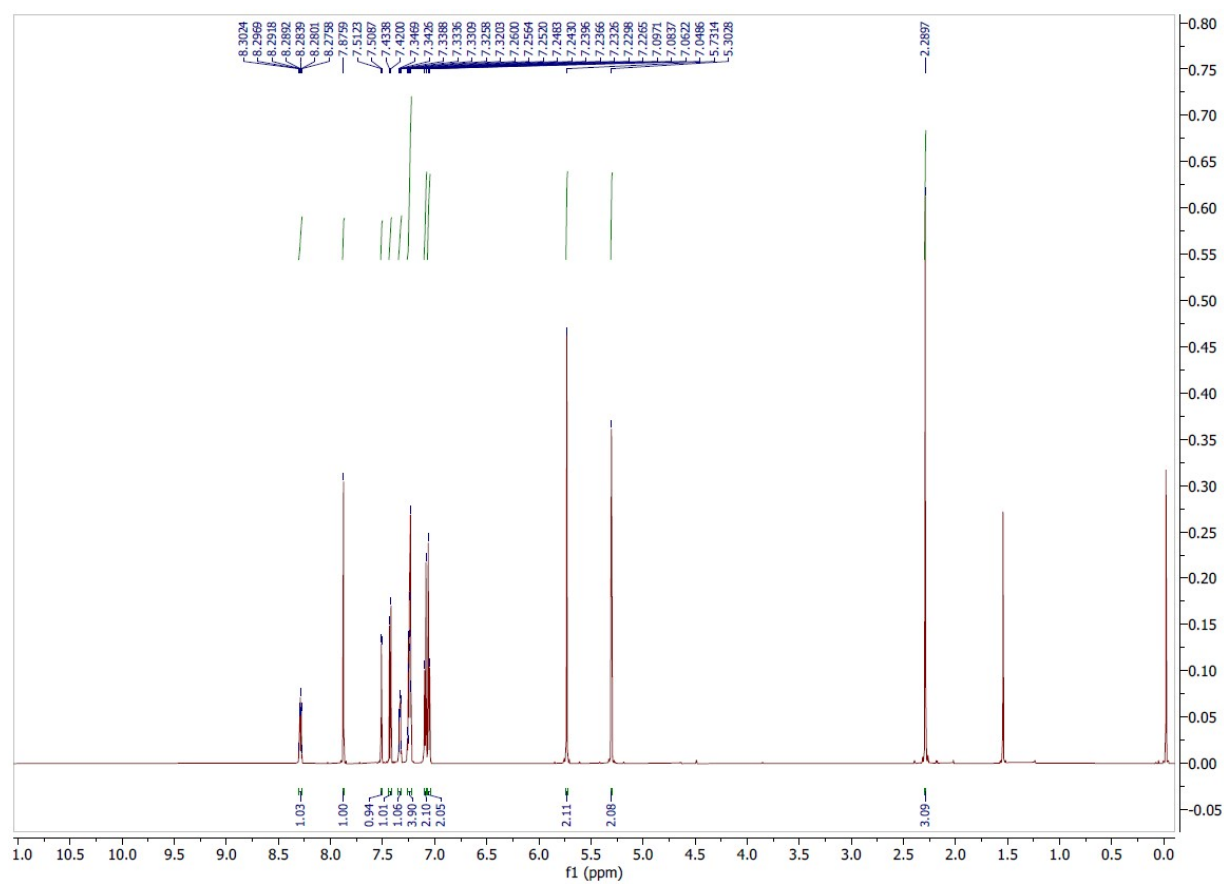

Figure S60. <sup>1</sup>H NMR spectrum of compound 5I

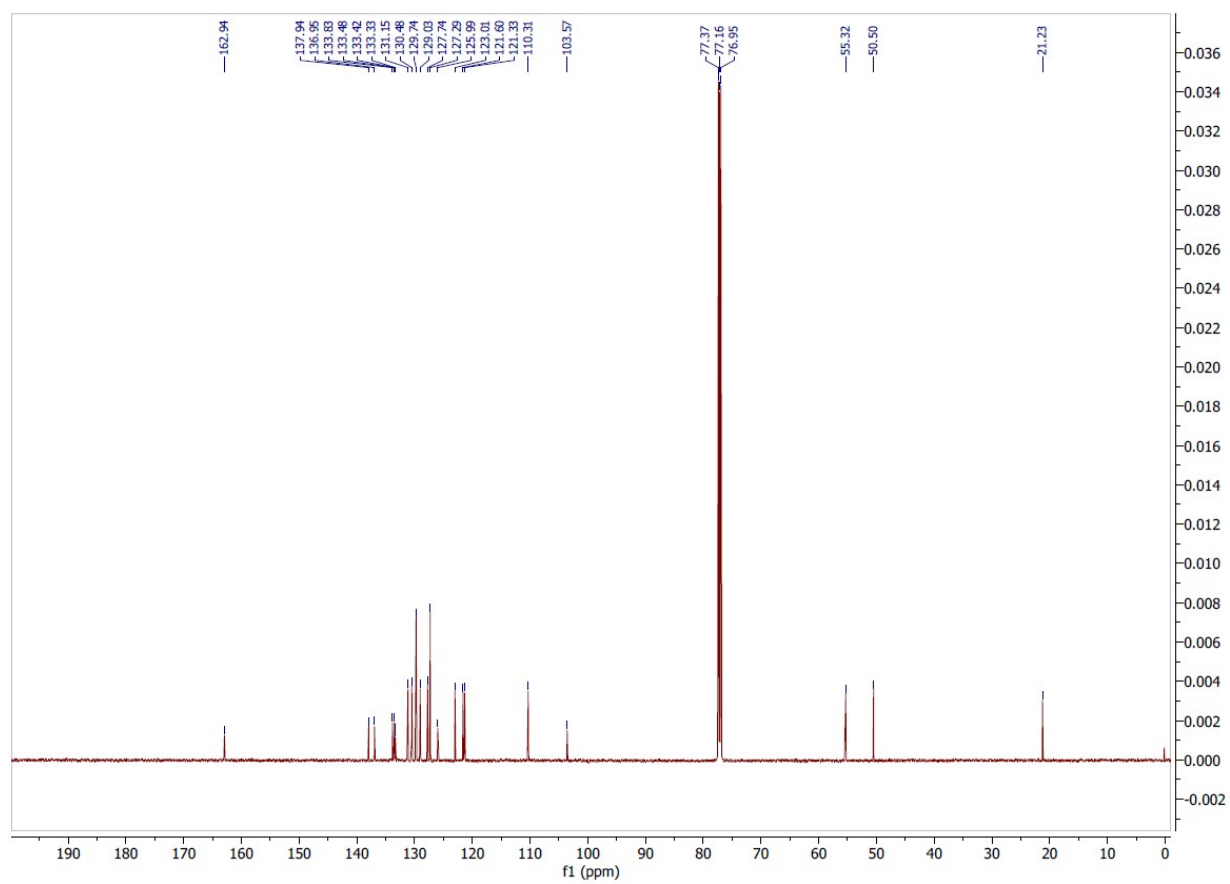

Figure S61. <sup>13</sup>C NMR spectrum of compound 5I

Sample Name : K\_366 a  
Test Name :  
060822\_K\_366 a 30 (0.320)

IITRPR

XEVO G2-XS QTOF

1: TOF MS ES+  
4.44e+006

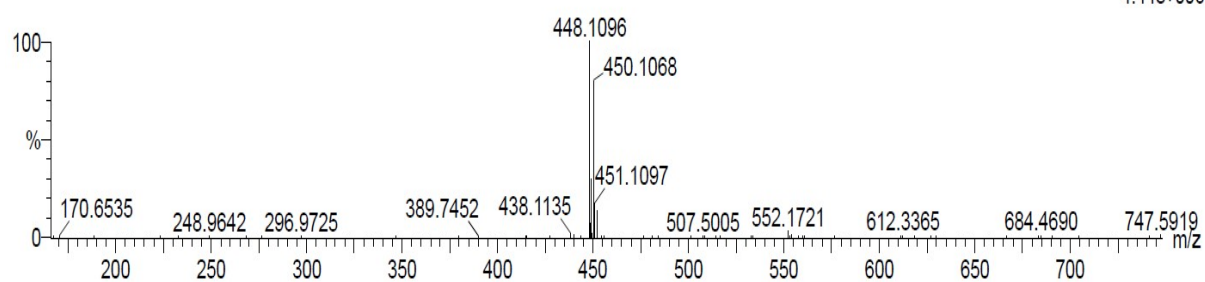

**Figure S62. HRMS spectrum of compound 5I**



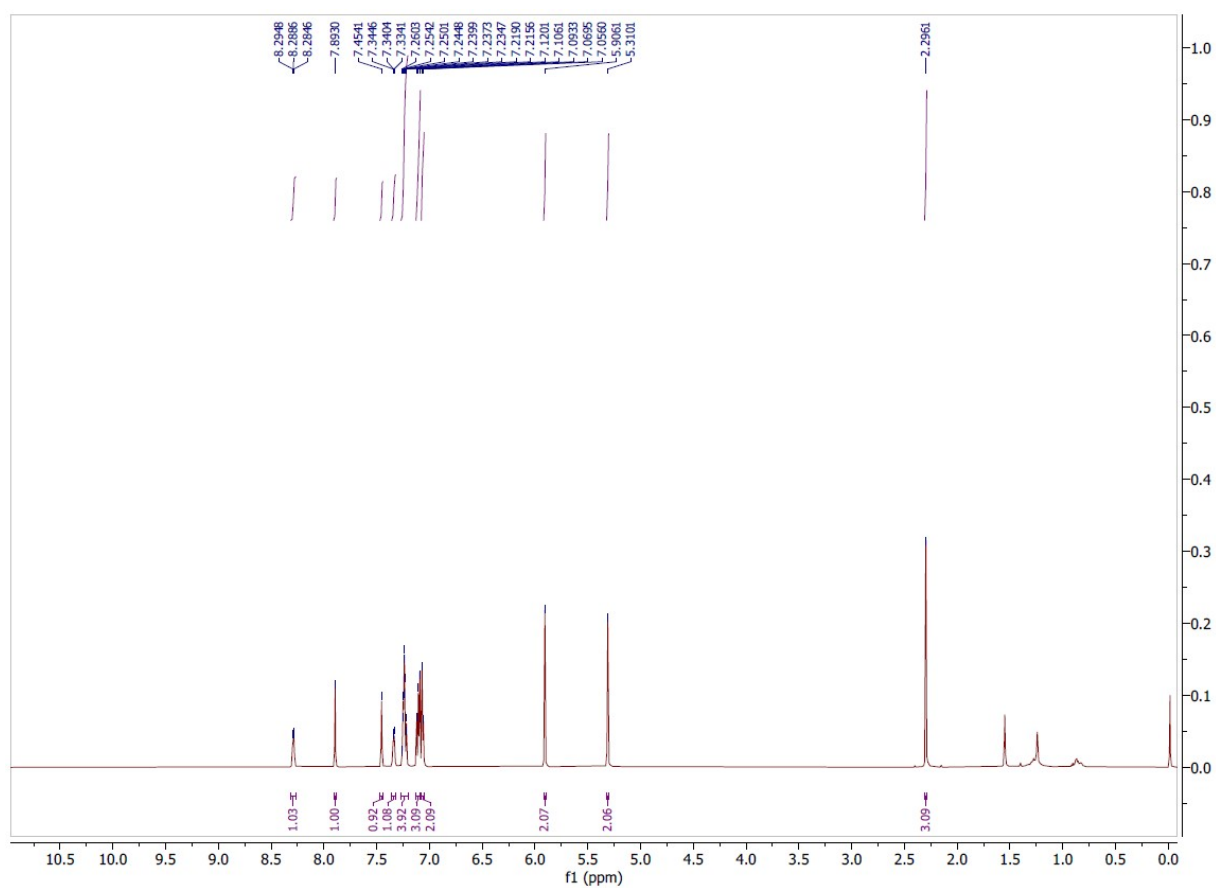

**Figure S63.**  $^1\text{H}$  NMR spectrum of compound 5m

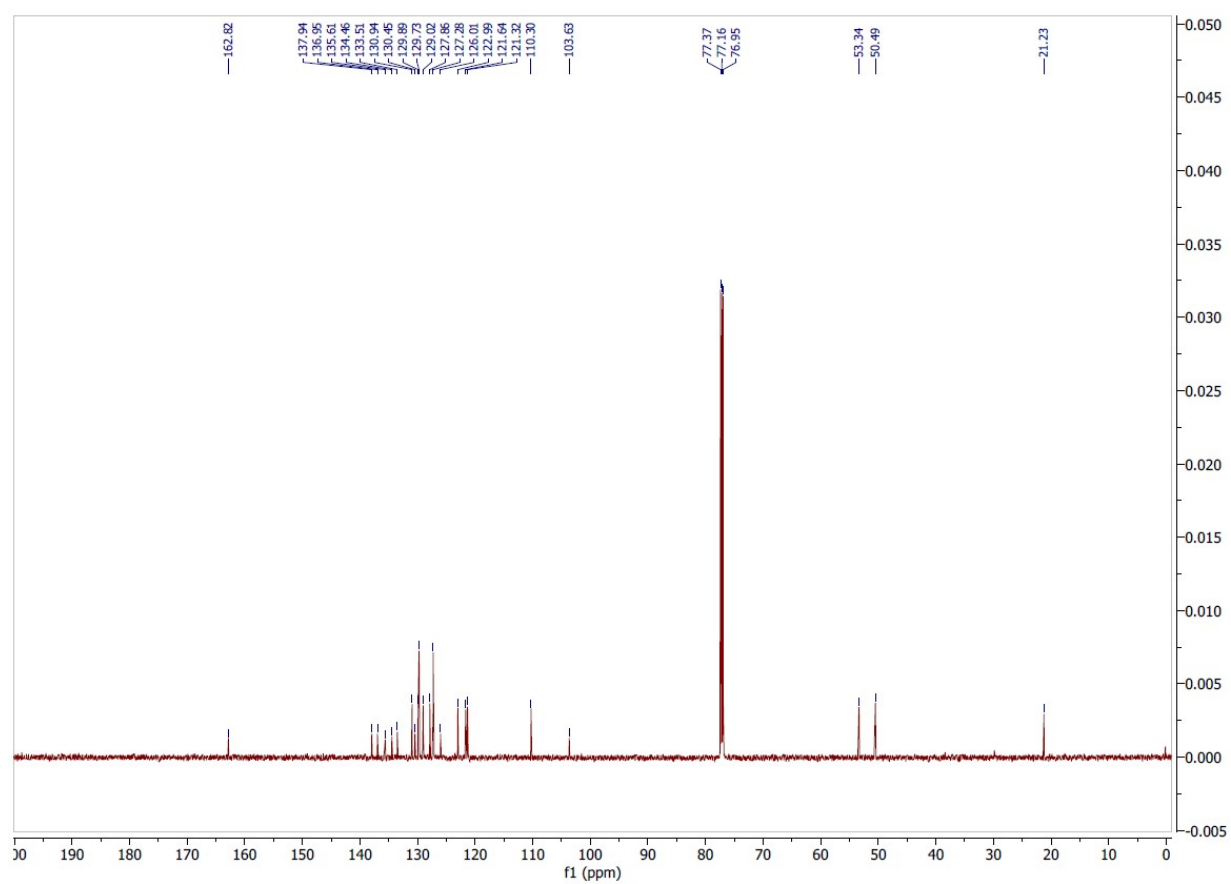

Figure S64. <sup>13</sup>C NMR spectrum of compound 5m

Sample Name : K\_365 a  
Test Name :  
060822\_K\_365 a 27 (0.294)

IITRPR

XEVO G2-XS QTOF

1: TOF MS ES+  
1.16e+007

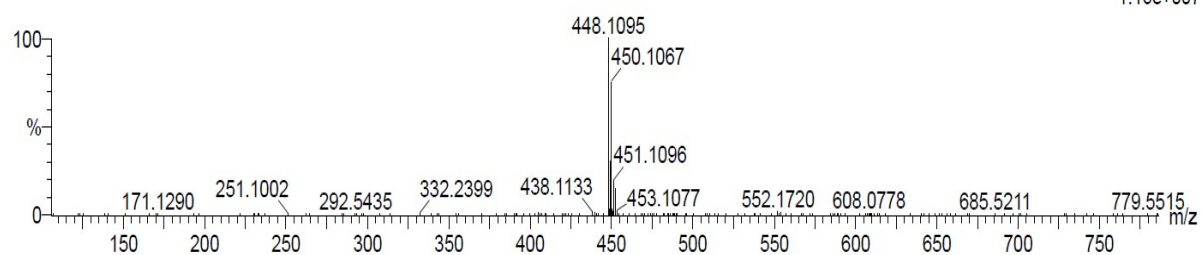

**Figure S65. HRMS spectrum of compound 5m**

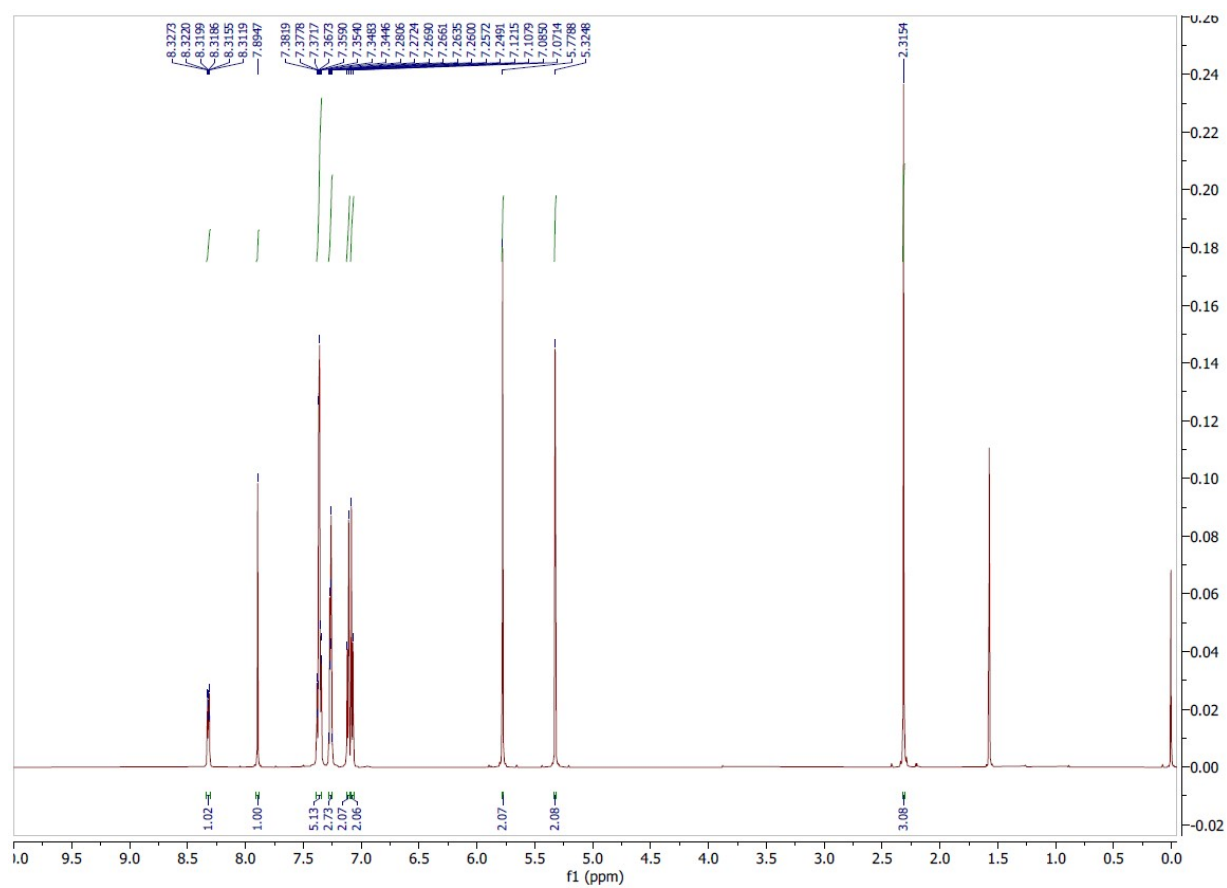

Figure S66. <sup>1</sup>H NMR spectrum of compound 5n

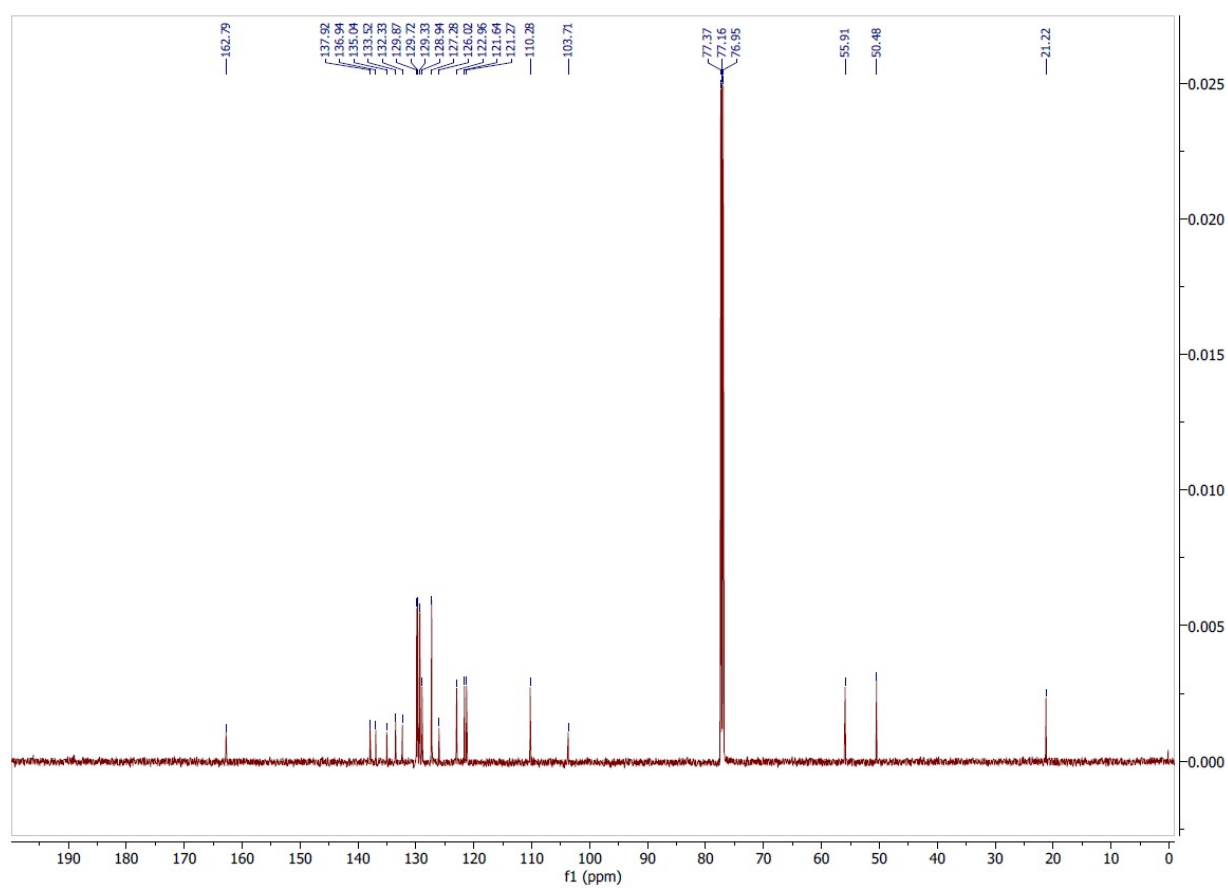

Figure S67.  $^{13}\text{C}$  NMR spectrum of compound 5n

Sample Name : K\_372 a  
Test Name :  
060822\_K\_372 a 34 (0.366)

IITRPR

XEVO G2-XS QTOF

1: TOF MS ES+  
2.05e+007

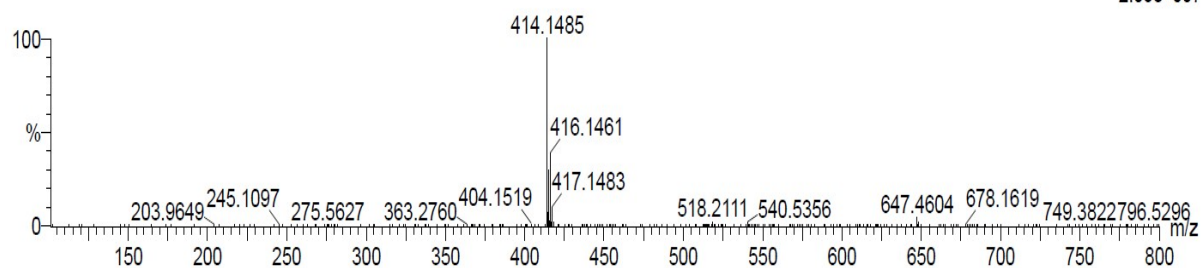

**Figure S68. HRMS spectrum of compound 5n**

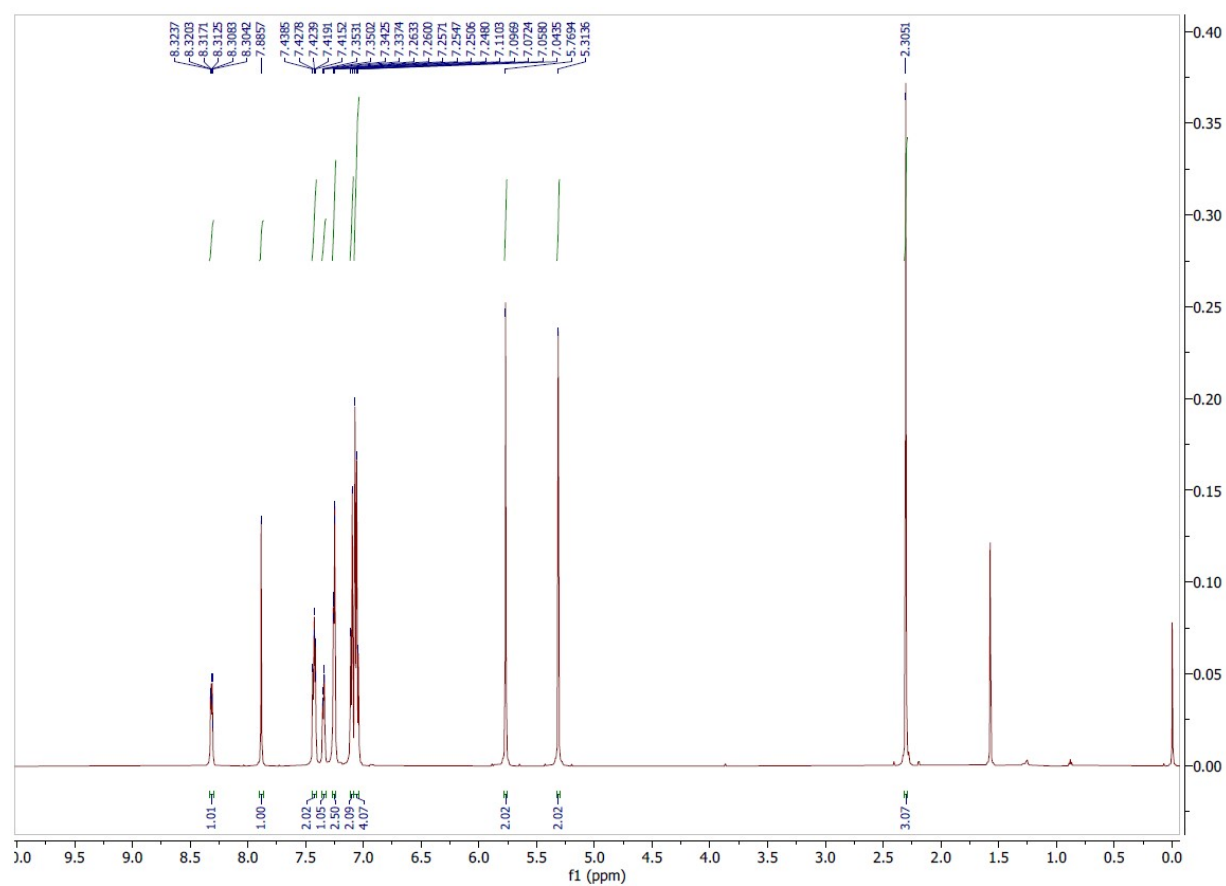

Figure S69. <sup>1</sup>H NMR spectrum of compound 5o

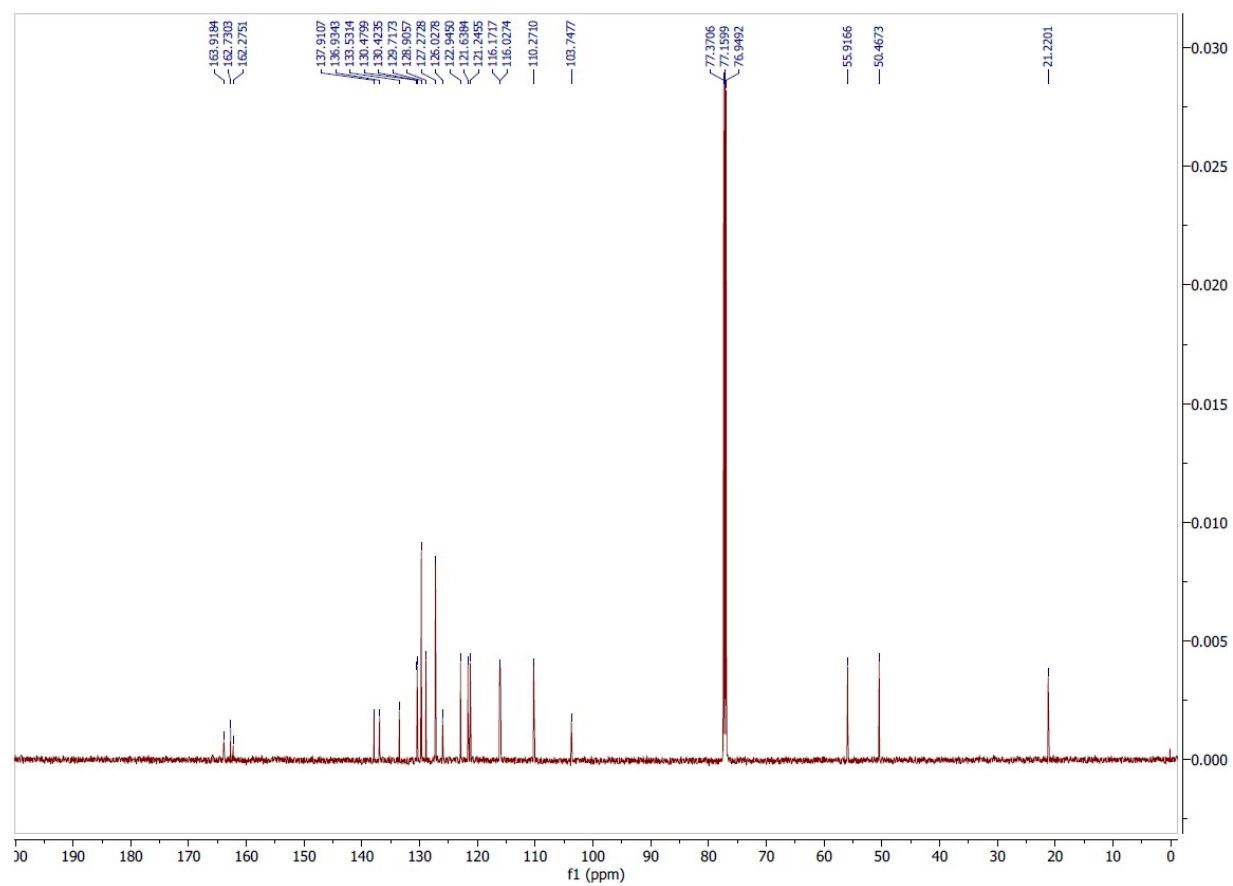

Figure S70. <sup>13</sup>C NMR spectrum of compound 5o



Sample Name : K\_373 a  
Test Name :  
060822\_K\_373 a 32 (0.337)

IITRPR

XEVO G2-XS QTOF

1: TOF MS ES+  
1.00e+007

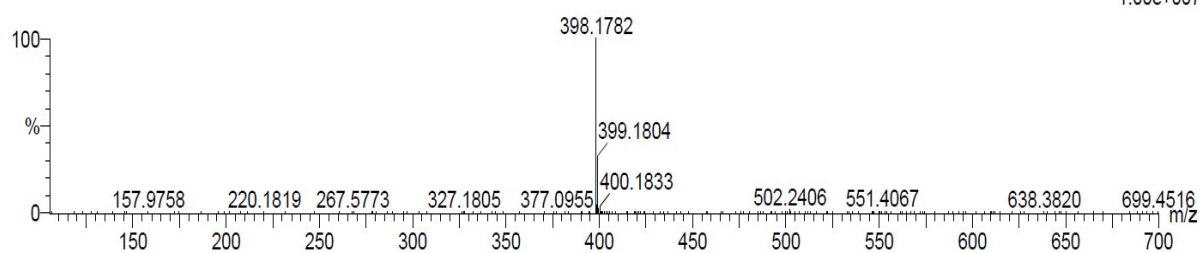

**Figure S71. HRMS spectrum of compound 5o**

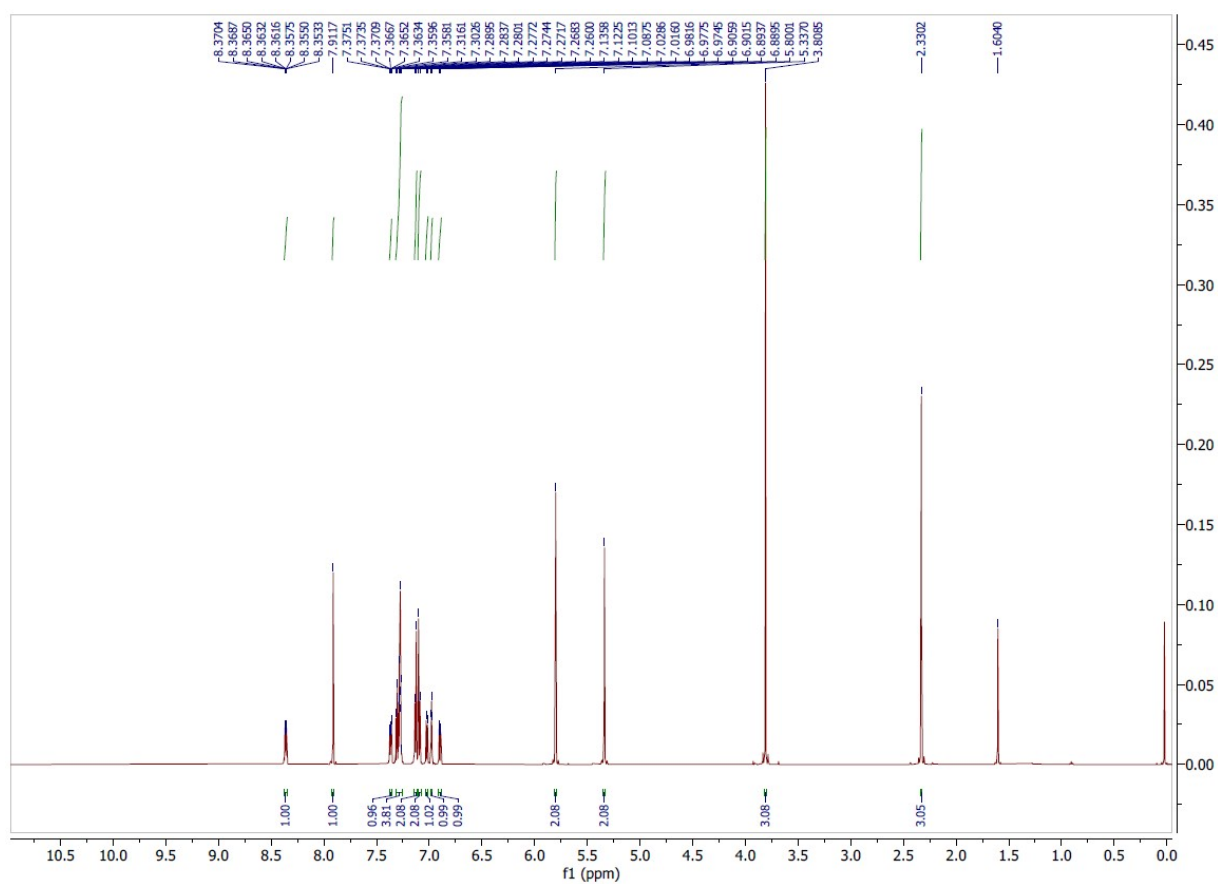

Figure S72.  $^1\text{H}$  NMR spectrum of compound 5p

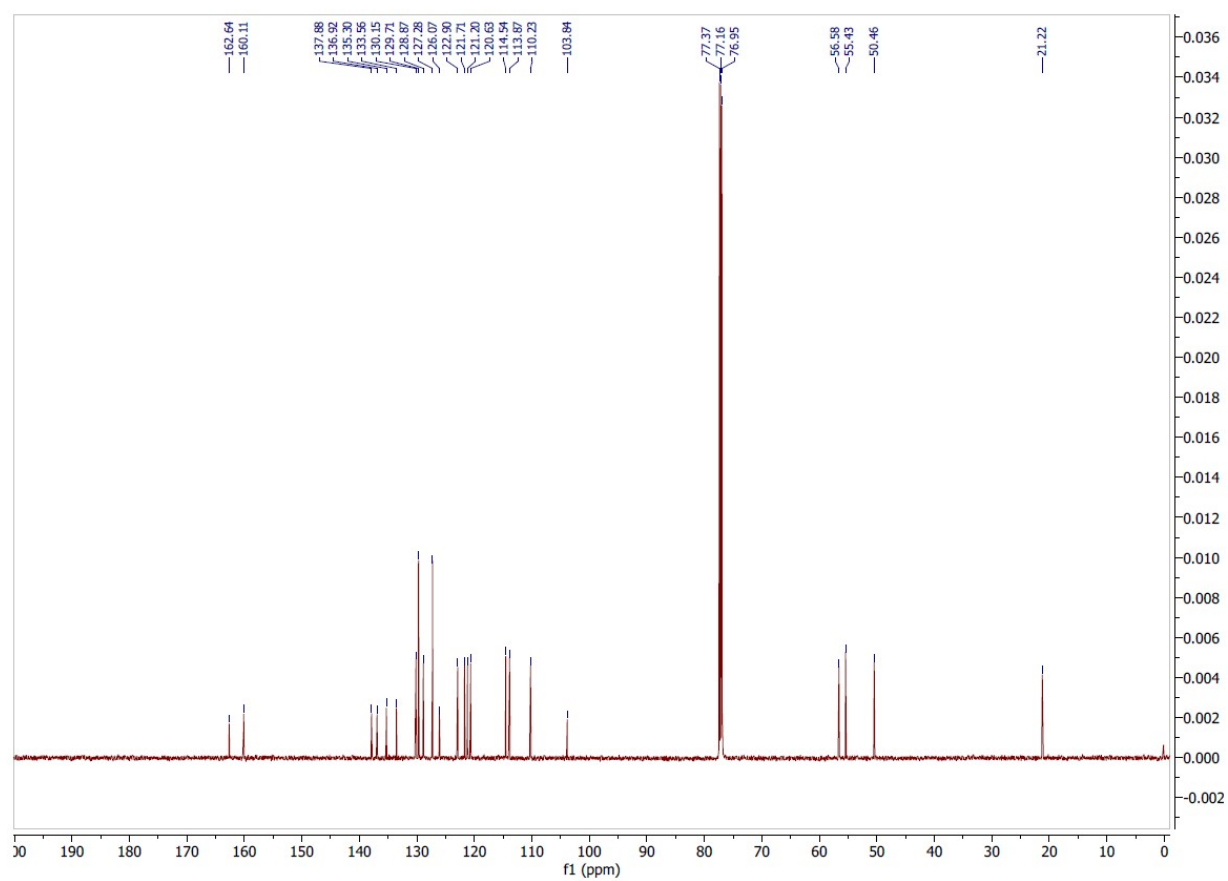

Figure S73. <sup>13</sup>C NMR spectrum of compound 5p

Sample Name : K\_369 a  
Test Name :  
060822\_K\_369 a 34 (0.366)

IITRPR

XEVO G2-XS QTOF

1: TOF MS ES+  
7.03e+006

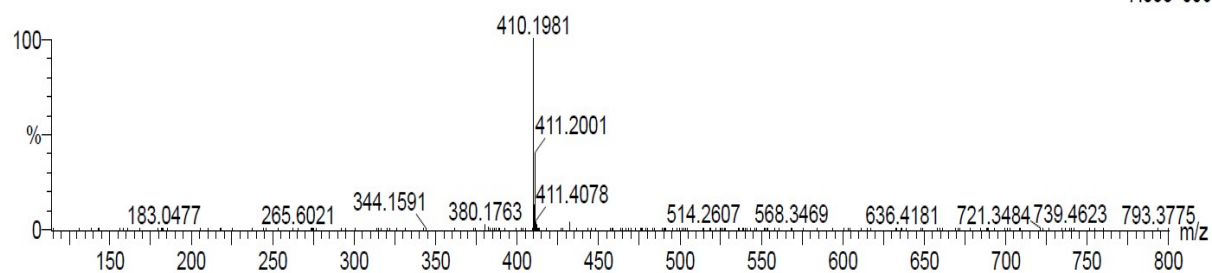

**Figure S74. HRMS spectrum of compound 5p**

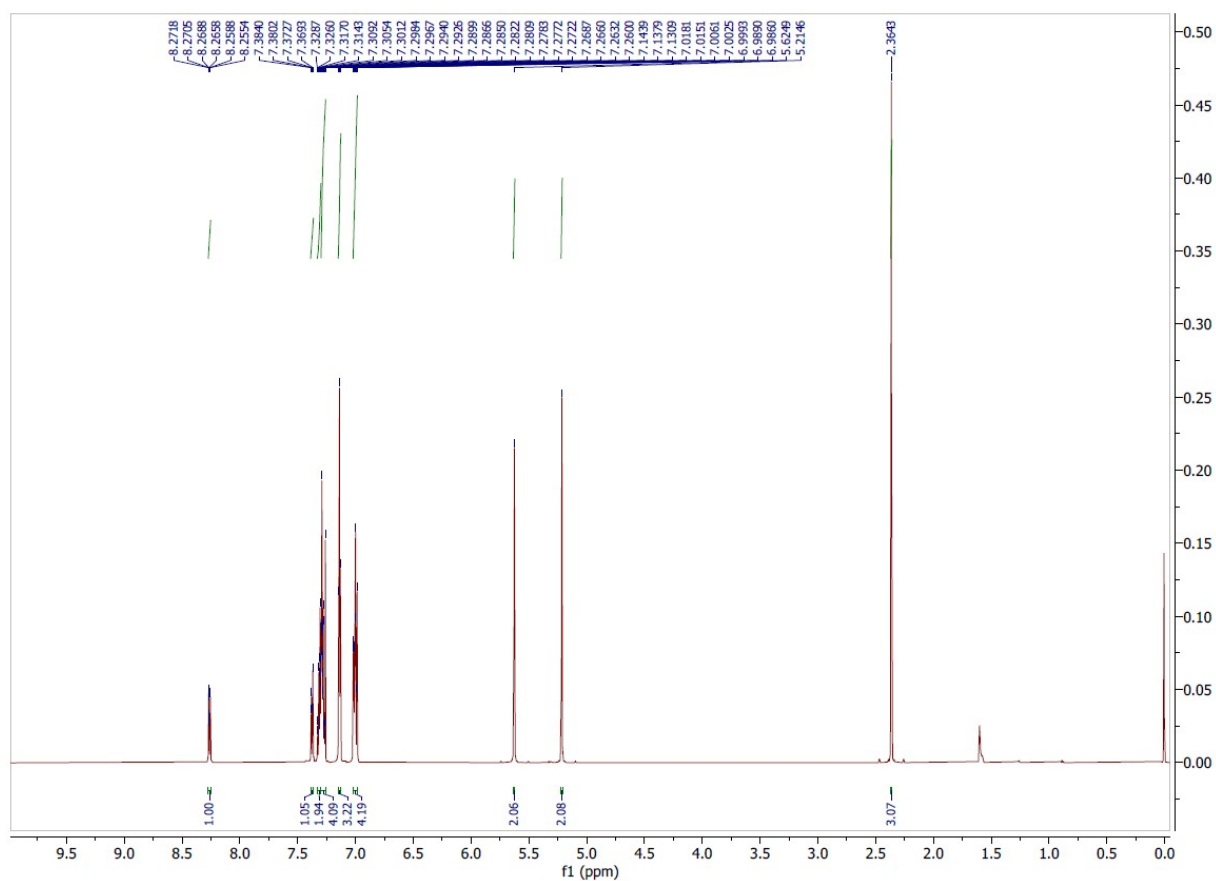

Figure S75.  $^1\text{H}$  NMR spectrum of compound 6i

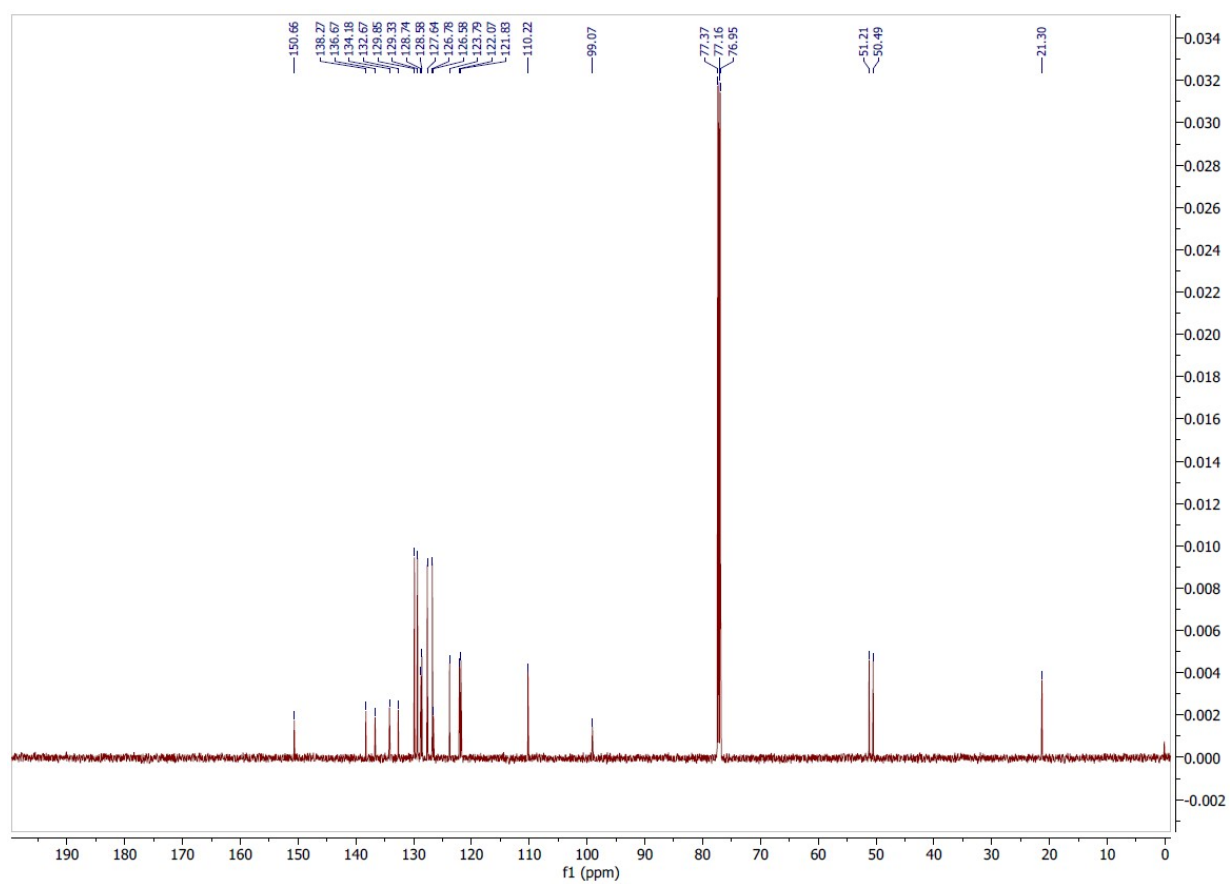

Figure S76.  $^{13}\text{C}$  NMR spectrum of compound 6i

Sample Name : K\_374 b  
Test Name :  
060822\_K\_374 b 35 (0.374)

IITRPR

XEVO G2-XS QTOF

1: TOF MS ES+  
2.18e+007

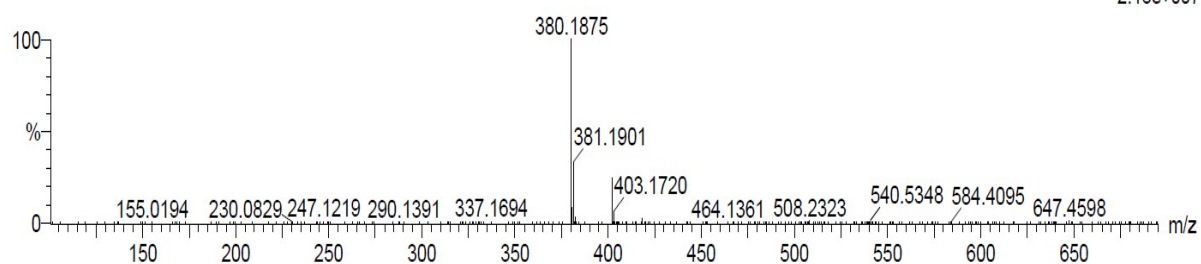

**Figure S77. HRMS spectrum of compound 6i**

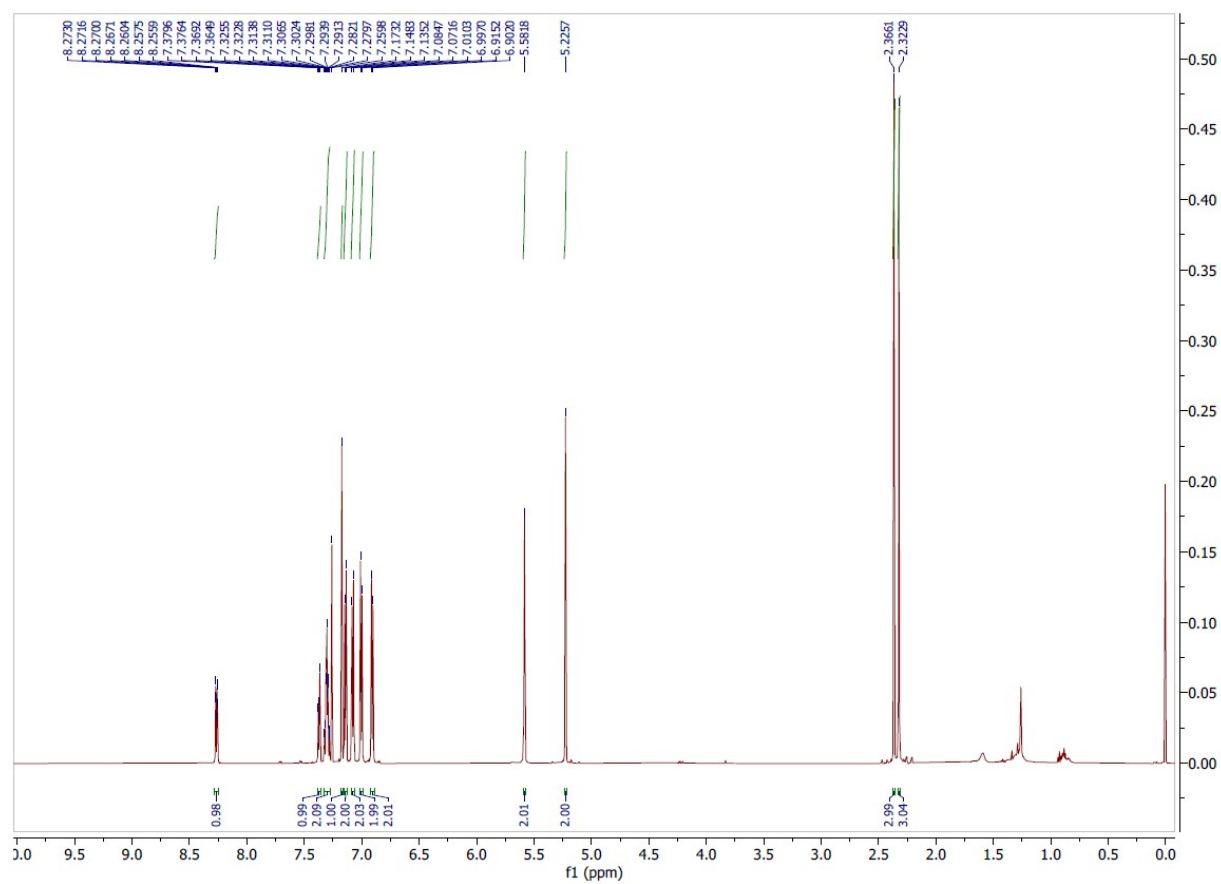

Figure S78. <sup>1</sup>H NMR spectrum of compound 6j



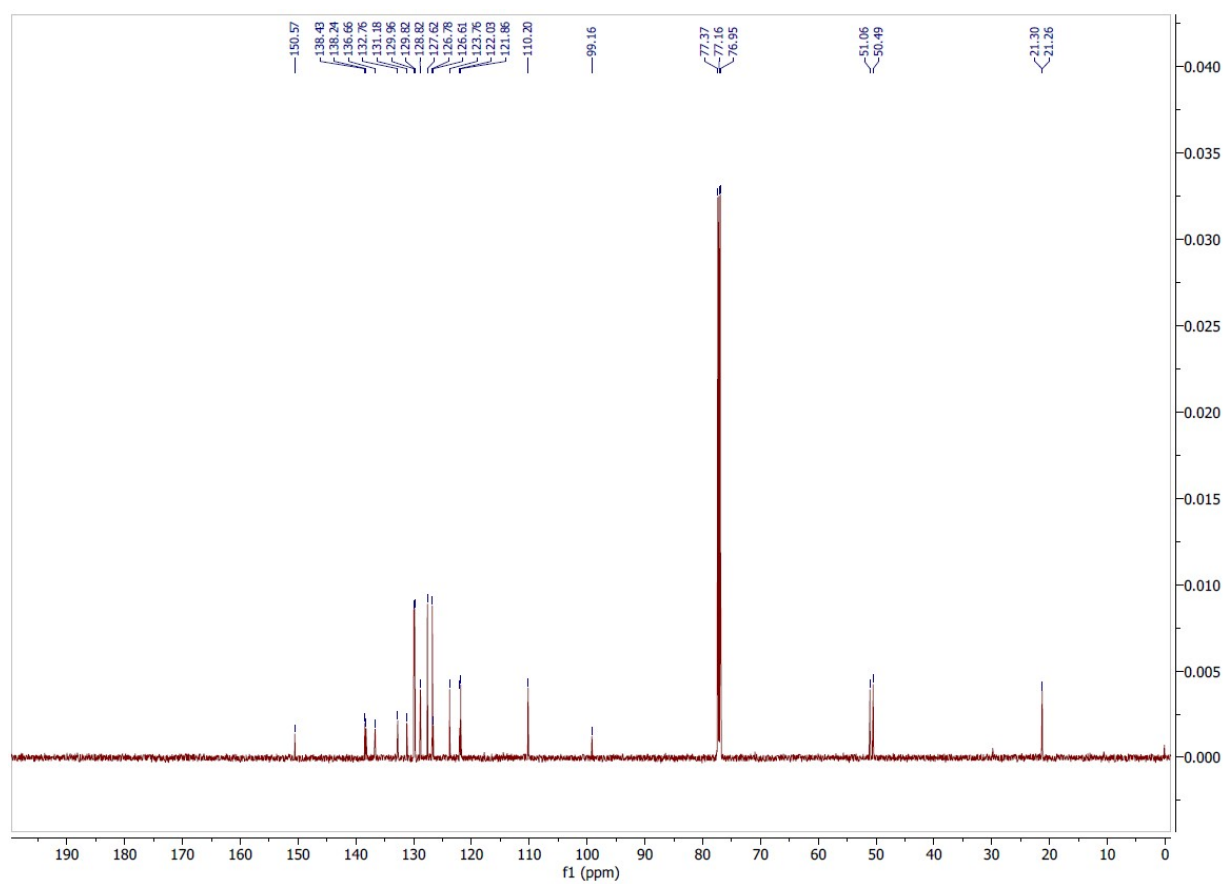

Figure S79. <sup>13</sup>C NMR spectrum of compound 6j

Sample Name : K\_370 b  
Test Name :  
060822\_K\_370 b 41 (0.437)

IITRPR

XEVO G2-XS QTOF

1: TOF MS ES+  
3.69e+007

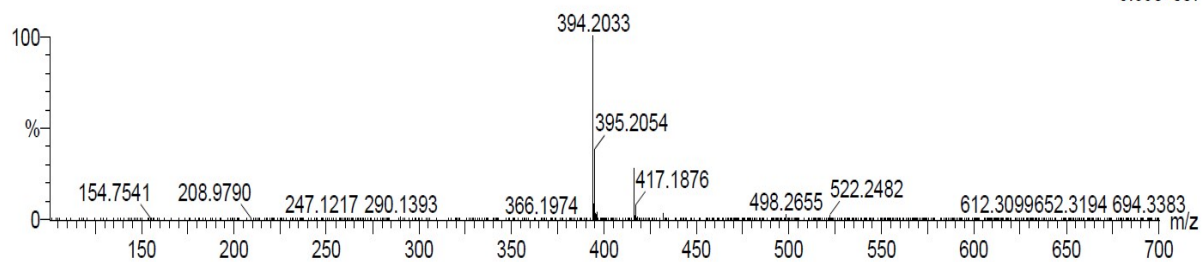

**Figure S80. HRMS spectrum of compound 6j**

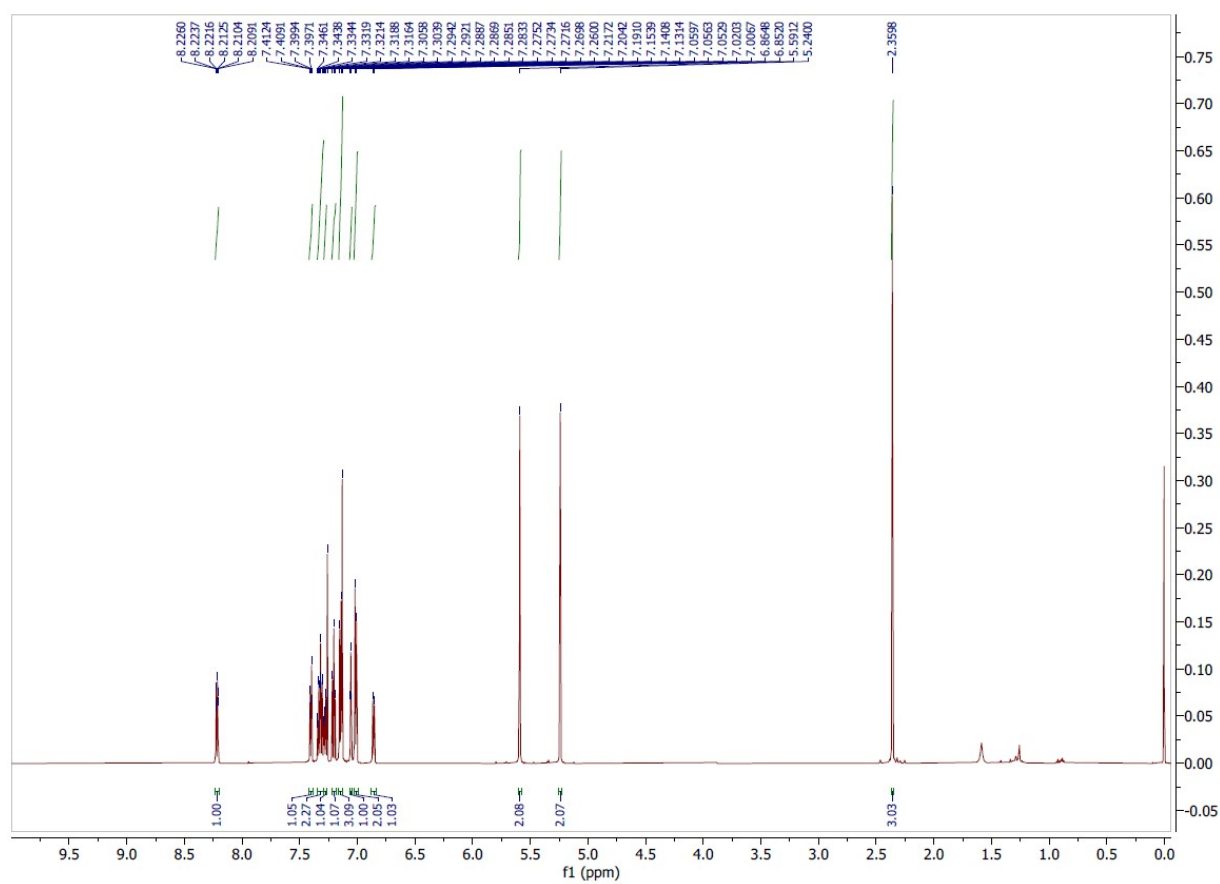

**Figure S81.**  $^1\text{H}$  NMR spectrum of compound 6k

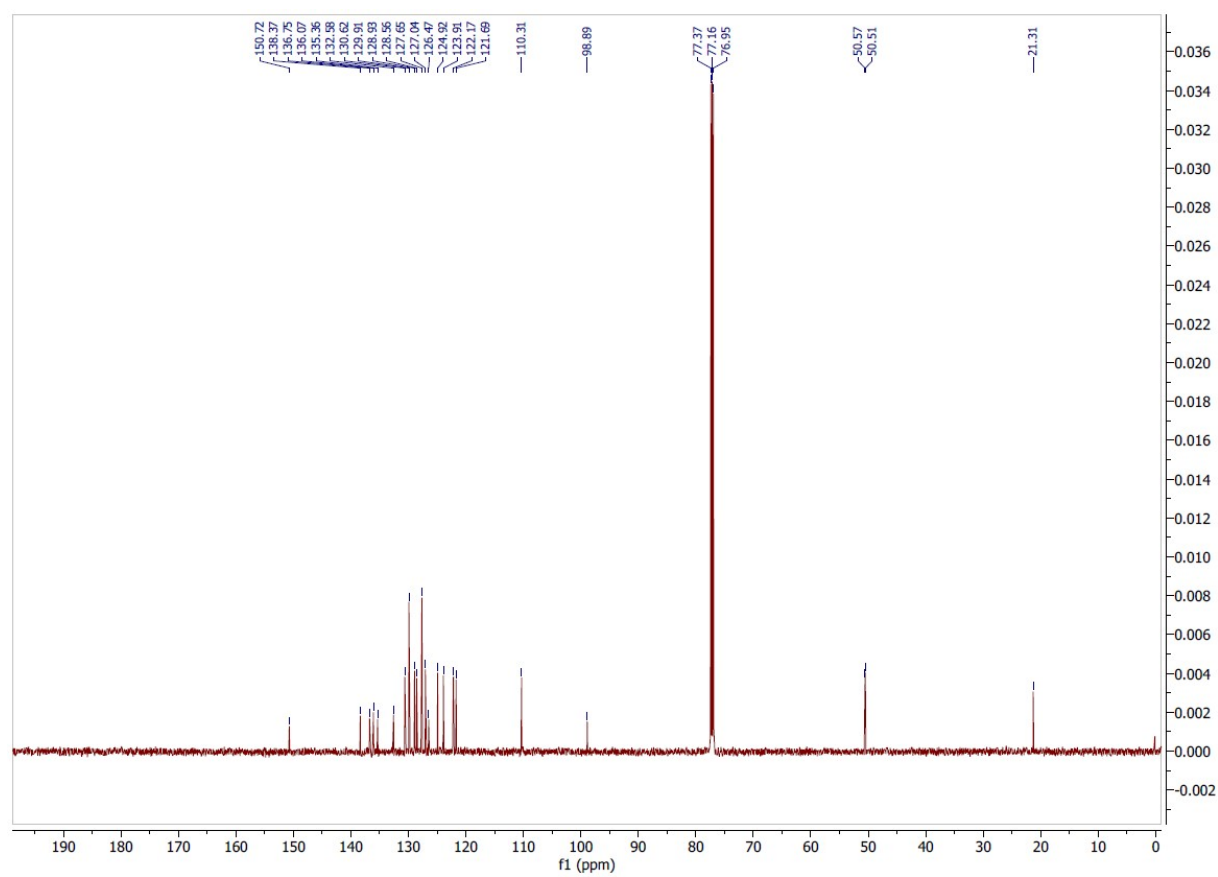

Figure S82. <sup>13</sup>C NMR spectrum of compound 6k

Sample Name : K\_371 b  
Test Name :  
060822\_K\_371 b 29 (0.311)

IITRPR

XEVO G2-XS QTOF

1: TOF MS ES+  
1.24e+007

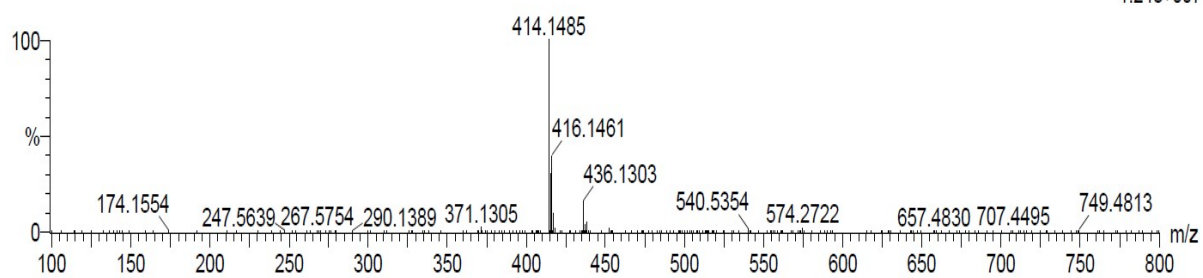

**Figure S83. HRMS spectrum of compound 6k**

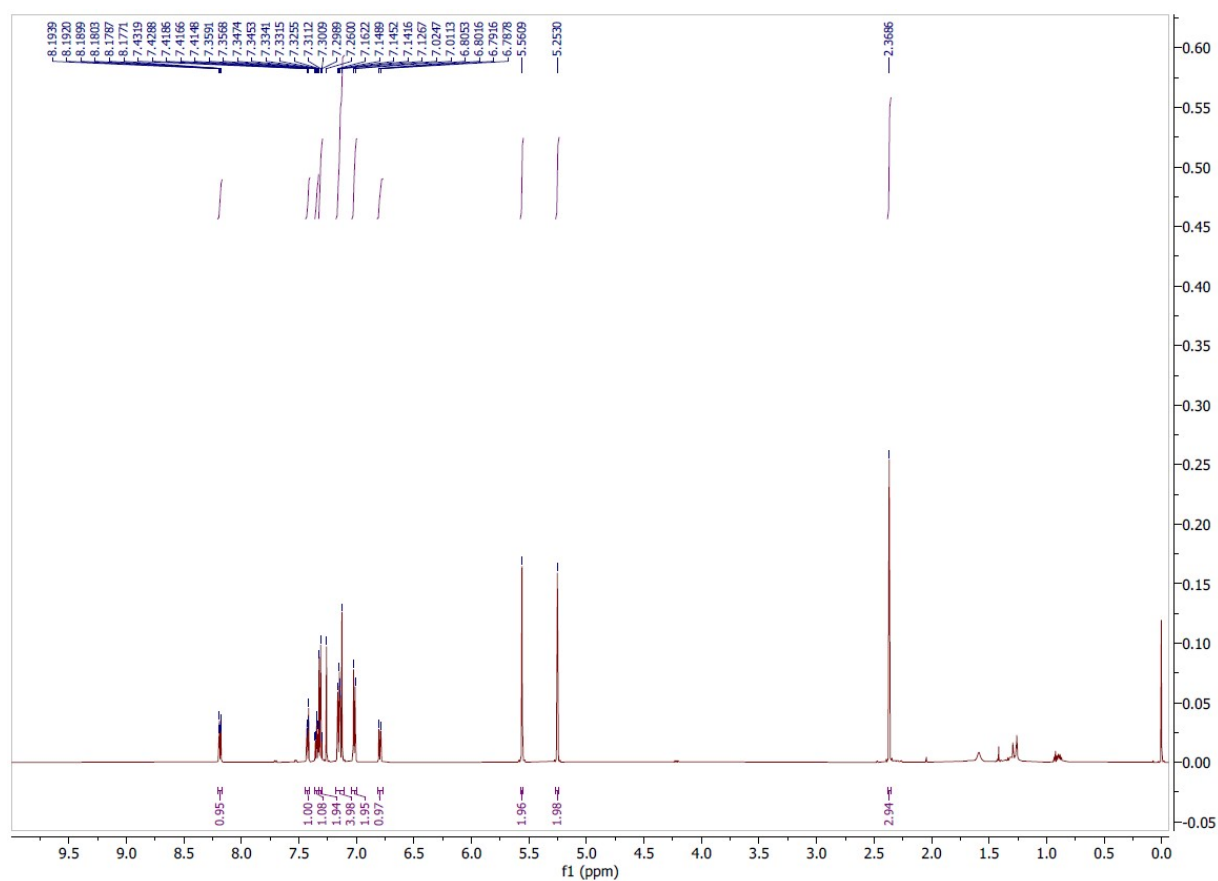

Figure S84. <sup>1</sup>H NMR spectrum of compound 6l

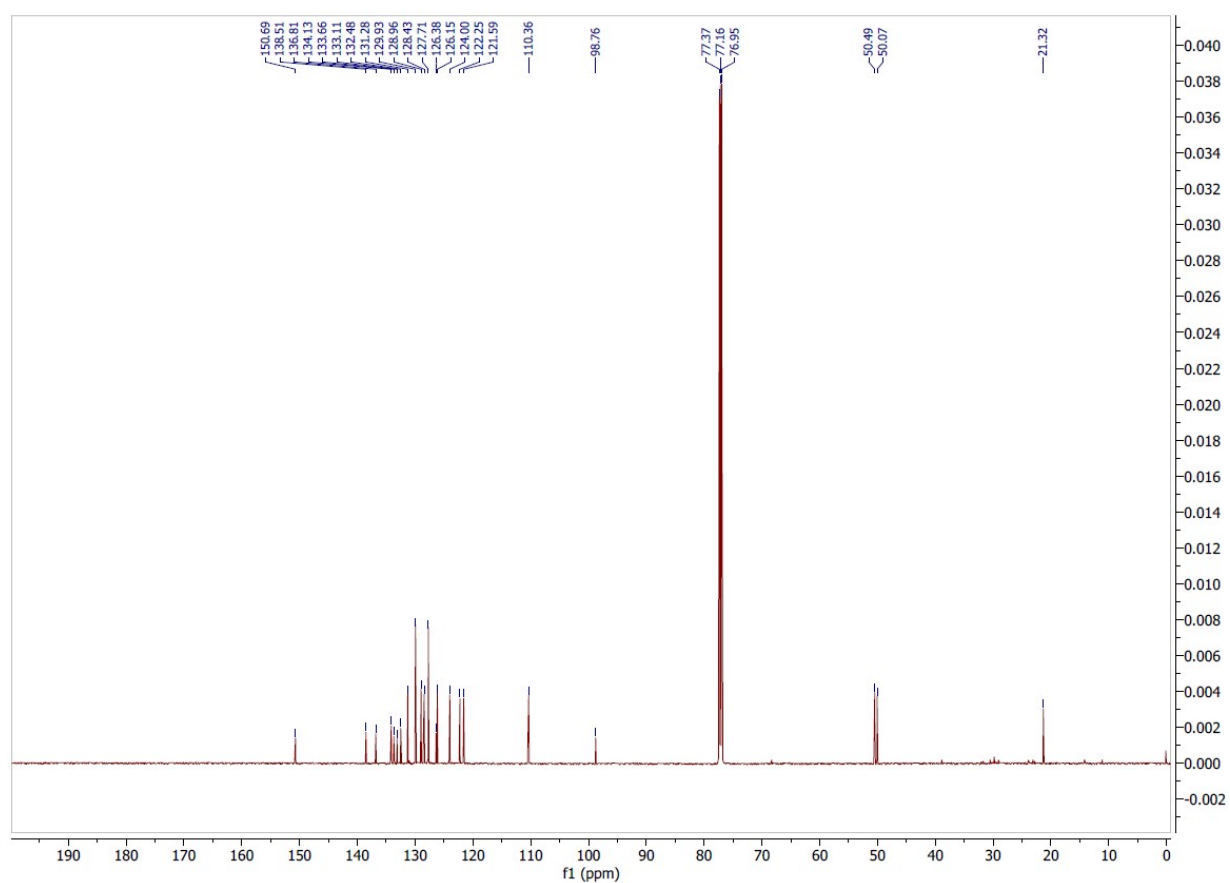

Figure S85.  $^{13}\text{C}$  NMR spectrum of compound 6l

Sample Name : K\_366 b  
Test Name :  
060822\_K\_366 b 28 (0.303)

IITRPR

XEVO G2-XS QTOF

1: TOF MS ES+  
1.28e+007

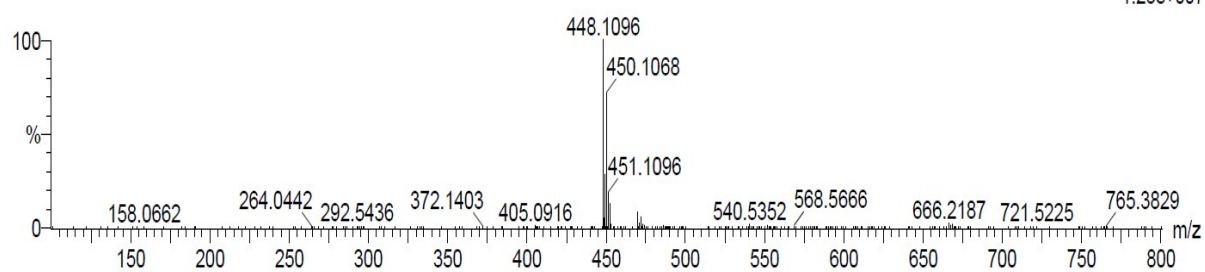

**Figure S86. HRMS spectrum of compound 6I**



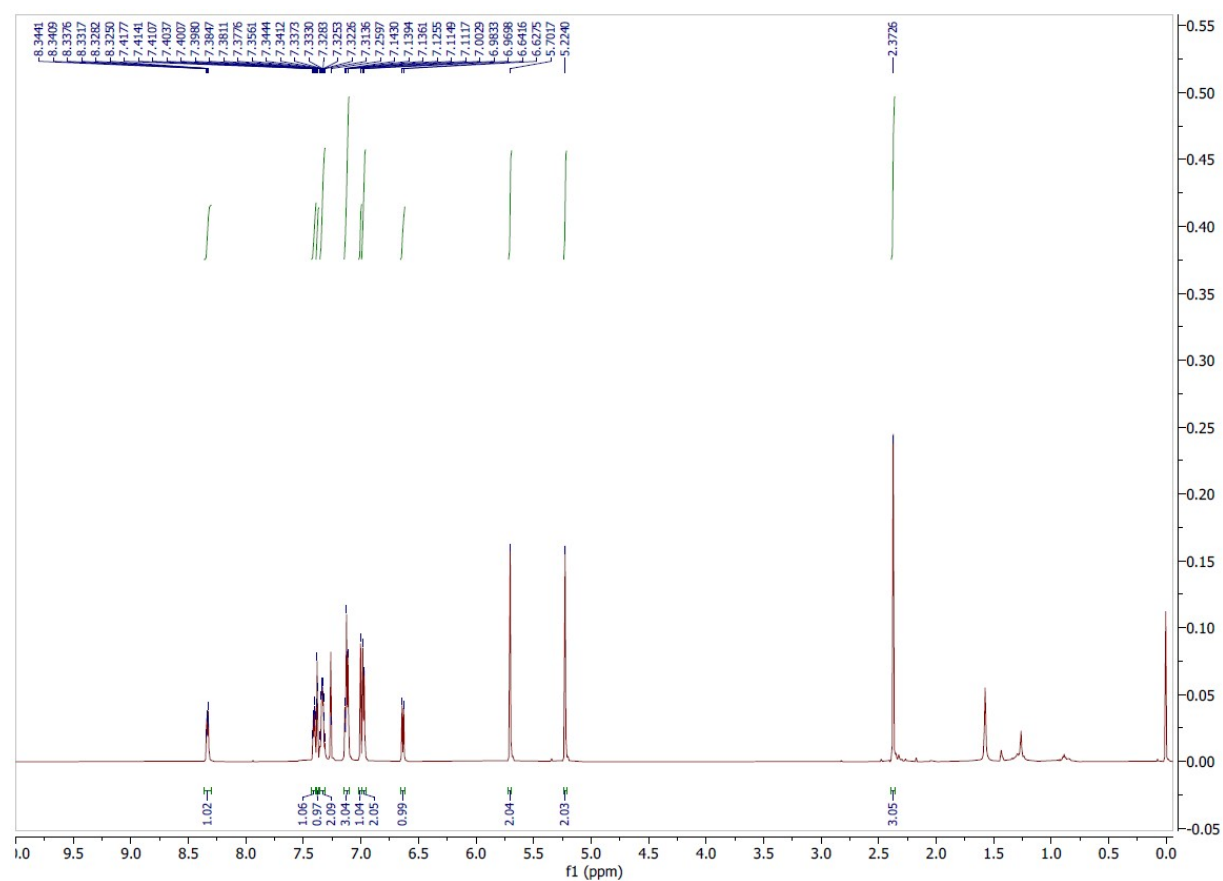

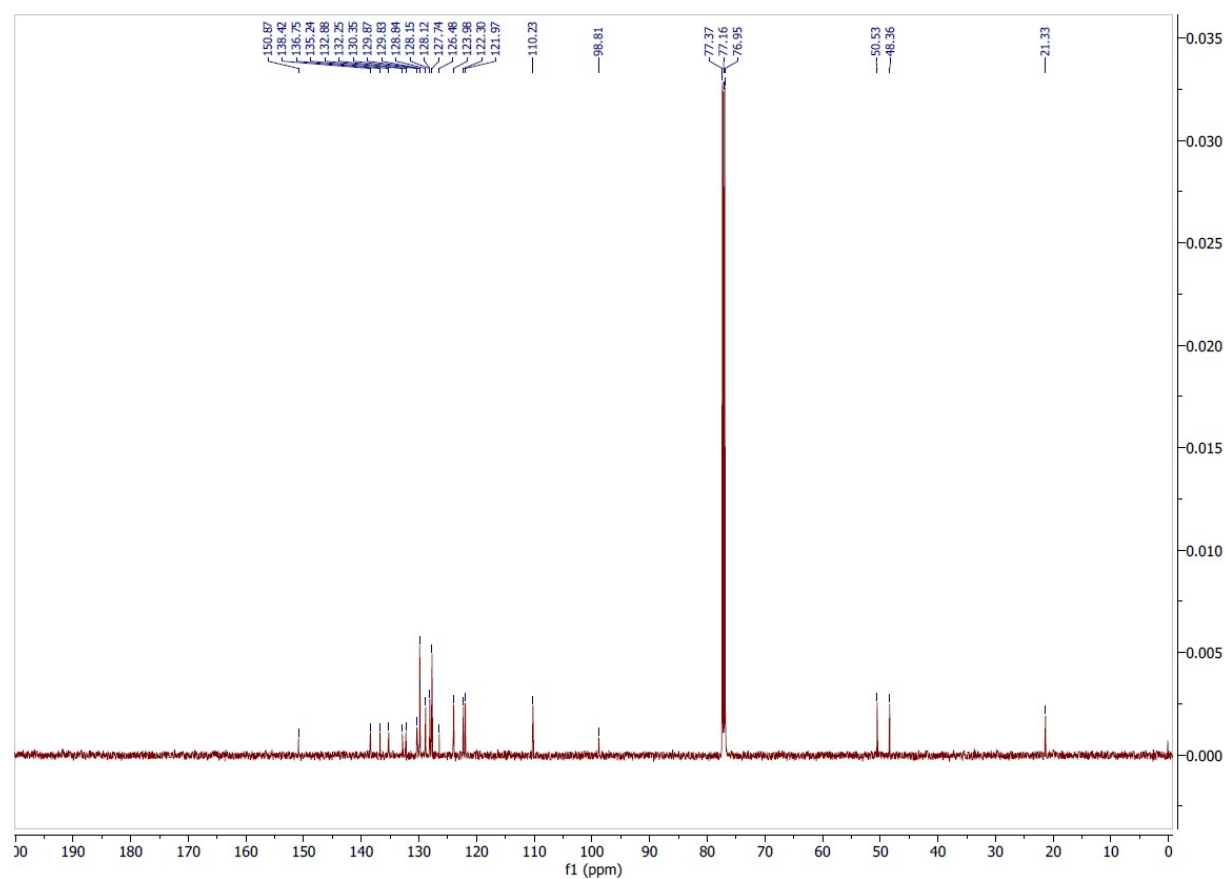

Figure S88.  $^{13}\text{C}$  NMR spectrum of compound 6m

Sample Name : K\_365 b  
Test Name :  
060822\_K\_365 b 28 (0.303)

IITRPR

XEVO G2-XS QTOF

1: TOF MS ES+  
2.62e+007

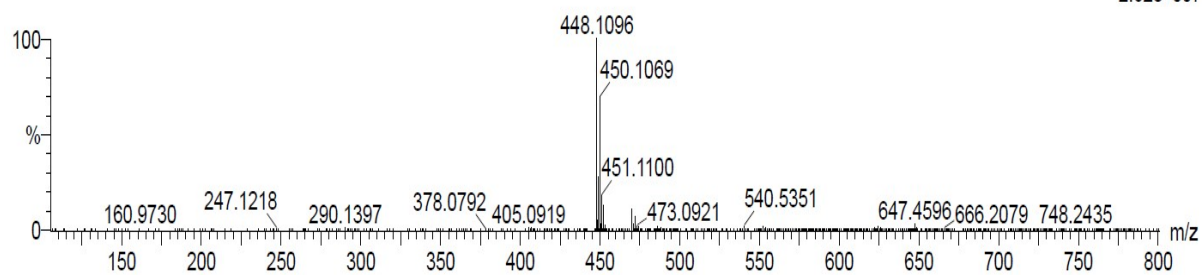

**Figure S89. HRMS spectrum of compound 6m**
